# Supplementary material for: Schiff Bases of Isatin and Adamantane-1-Carbohydrazide: Synthesis, Characterization and Anticonvulsant Activity
Source: Hindawi journal article supplement (doi:10.1155/2021/6659156), 2021-01-25

84.77  
77.36  
77.04  
76.72

38.87  
36.42  
27.96

Current Data Parameters  
NAME Hend M-Othman\_C\_H4  
EXPNO 10  
PROCNO 1

F2 - Acquisition Parameters  
Date\_ 20180611  
Time 16.09  
INSTRUM spect  
PROBHD 5 mm PABBO BB/  
PULPROG zgpg30  
TD 65536  
SOLVENT CDCl3  
NS 1200  
DS 4  
SWH 24038.461 Hz  
FIDRES 0.366798 Hz  
AQ 1.3631488 sec  
RG 202.37  
DW 20.800 usec  
DE 6.50 usec  
TE 298.0 K  
D1 2.00000000 sec  
D11 0.03000000 sec  
TDO 1

===== CHANNEL f1 =====  
SFO1 100.6379178 MHz  
NUC1 13C  
P1 10.00 usec  
PLW1 45.00000000 W

===== CHANNEL f2 =====  
SFO2 400.1916008 MHz  
NUC2 1H  
CPDPRG[2] waltz16

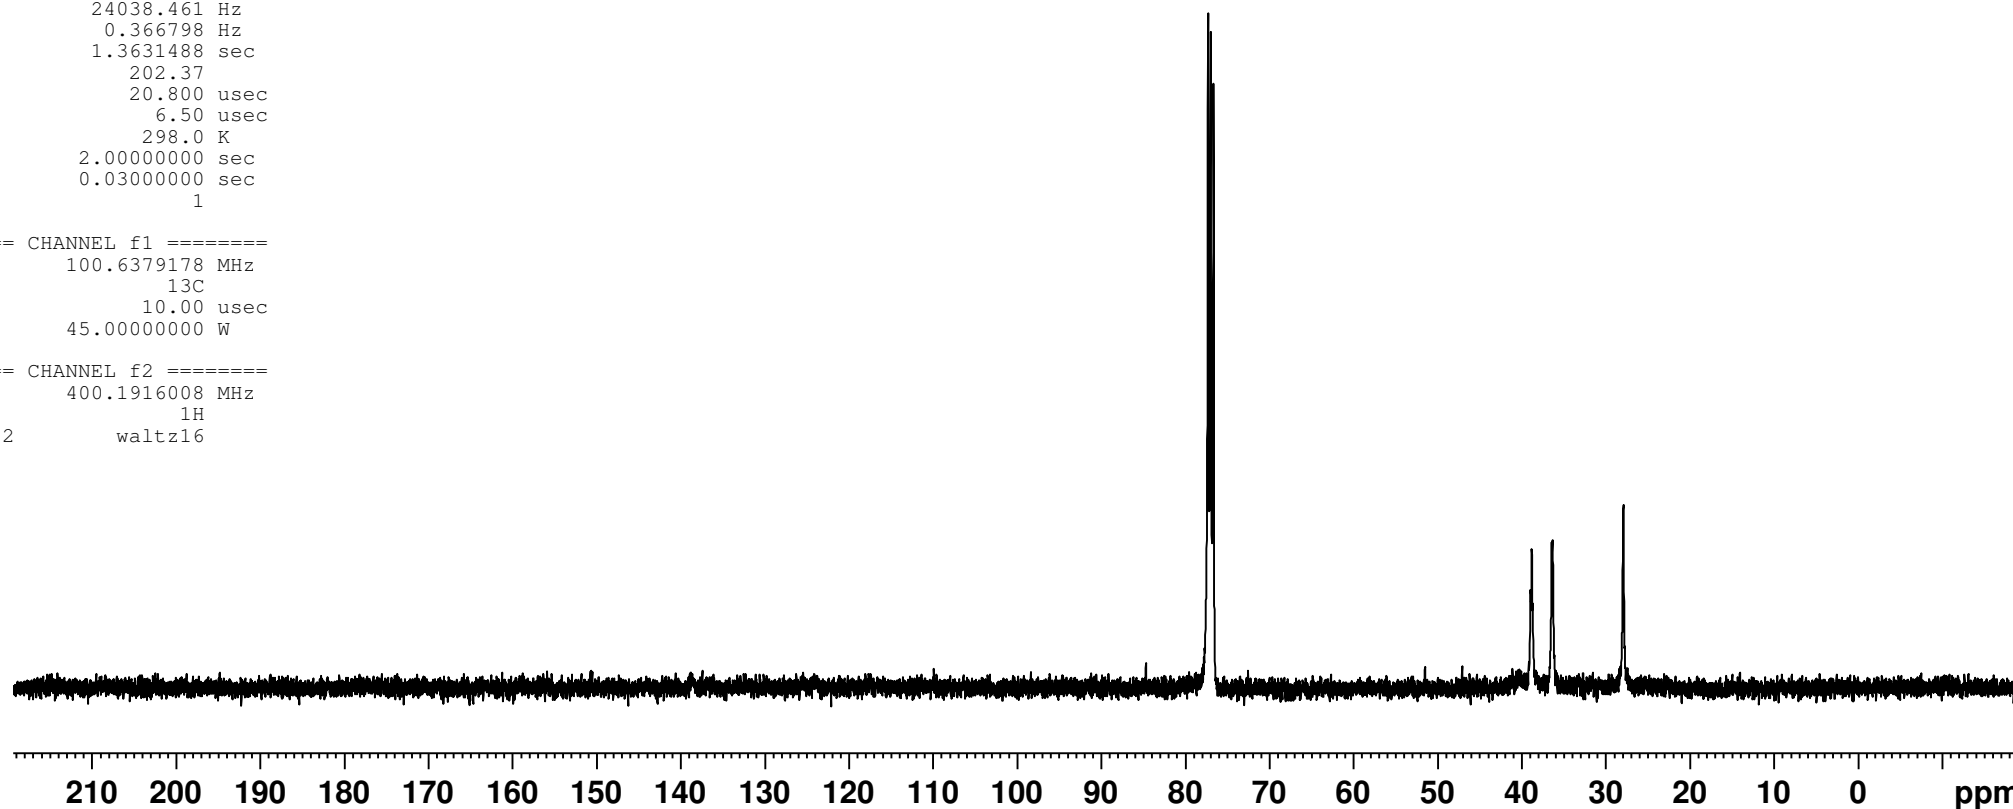

84.77  
77.36  
77.04  
76.7238.87  
36.42  
27.96

Current Data Parameters  
NAME Hend M-Othman\_C\_H4  
EXPNO 10  
PROCNO 1

F2 - Acquisition Parameters  
Date\_ 20180611  
Time 16.09  
INSTRUM spect  
PROBHD 5 mm PABBO BB/  
PULPROG zgpg30  
TD 65536  
SOLVENT CDCl3  
NS 1200  
DS 4  
SWH 24038.461 Hz  
FIDRES 0.366798 Hz  
AQ 1.3631488 sec  
RG 202.37  
DW 20.800 usec  
DE 6.50 usec  
TE 298.0 K  
D1 2.00000000 sec  
D11 0.03000000 sec  
TDO 1

==== CHANNEL f1 =====  
SFO1 100.6379178 MHz  
NUC1 13C  
P1 10.00 usec  
PLW1 45.00000000 W

==== CHANNEL f2 =====  
SFO2 400.1916008 MHz  
NUC2 1H  
CPDPRG[2] waltz16

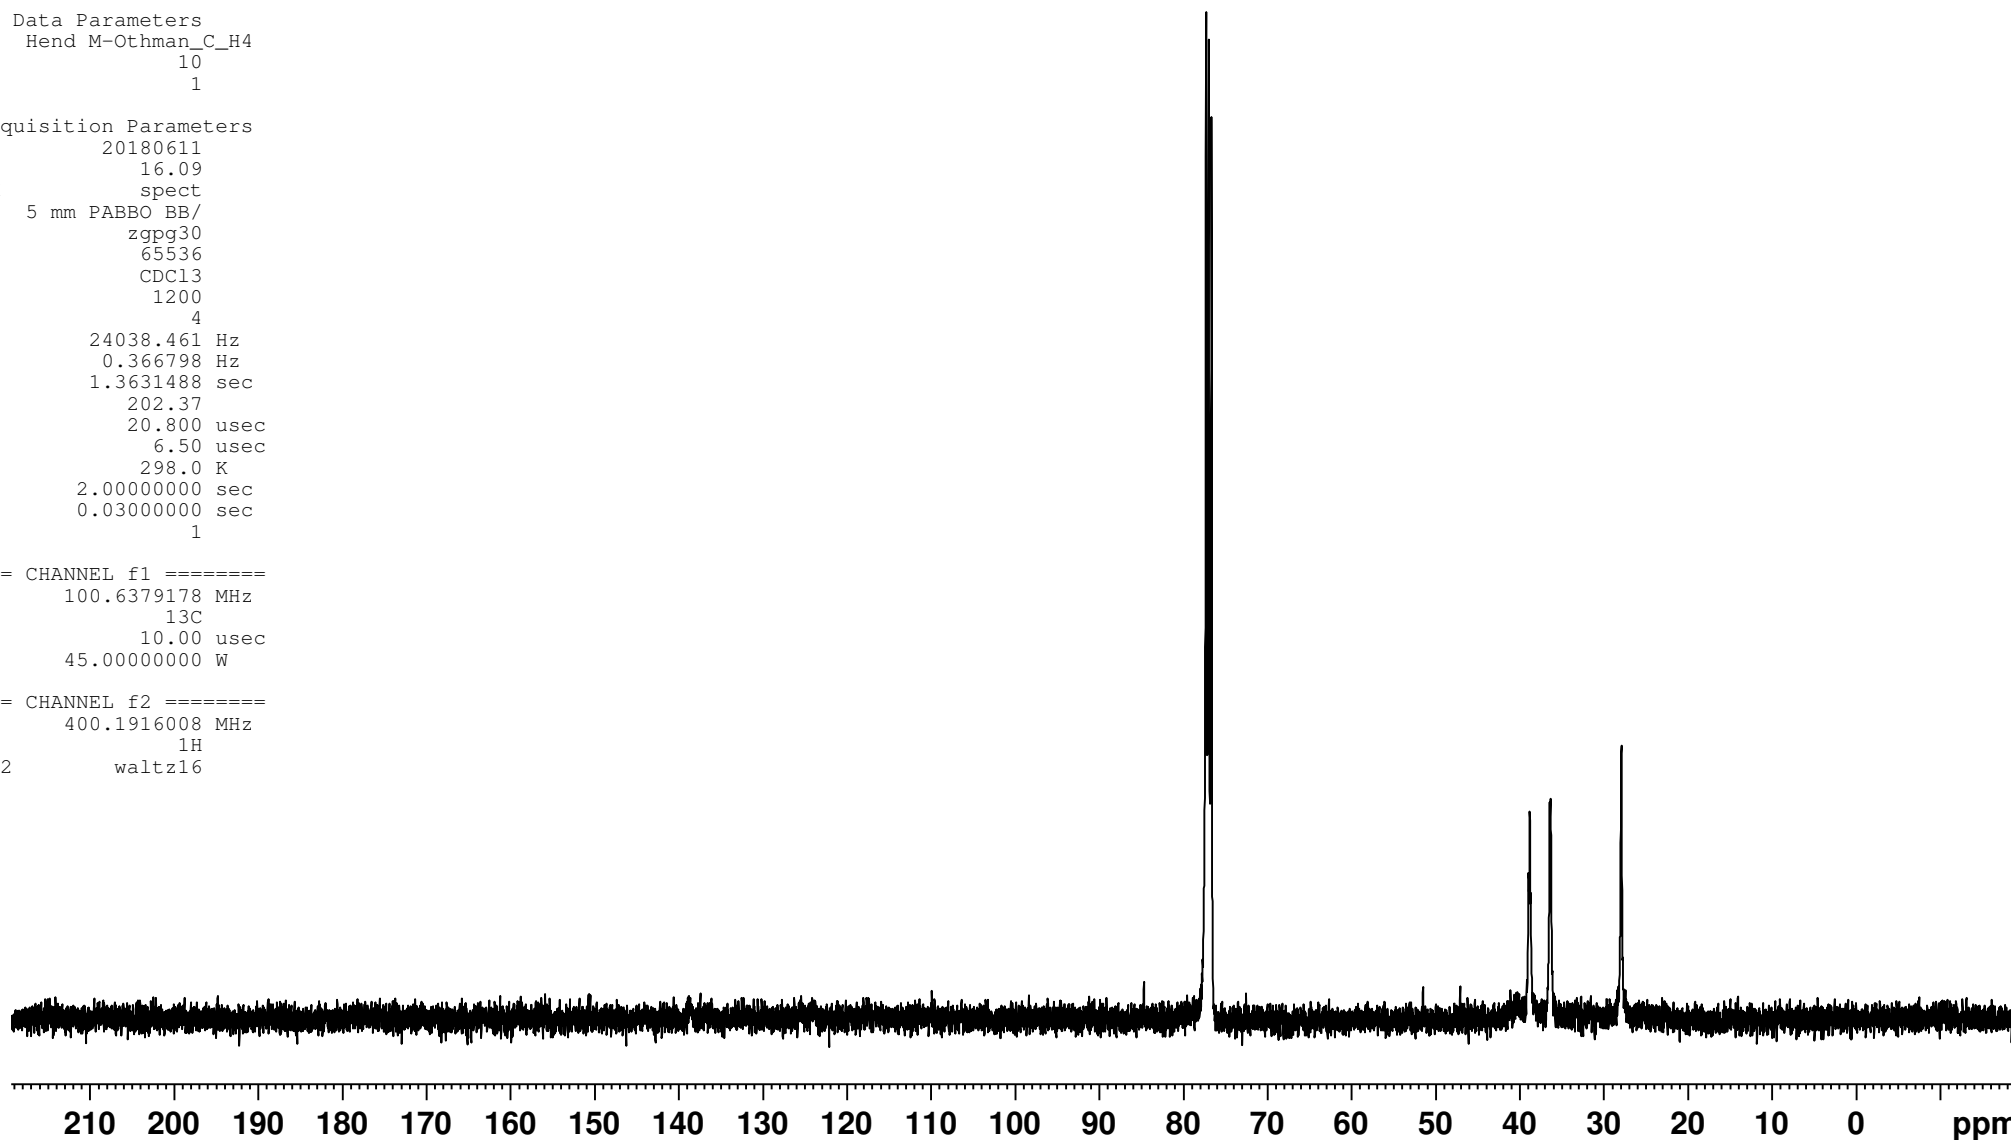

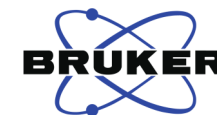

— 84.77

77.36  
77.04  
76.72

— 38.87

— 36.42

— 27.96

Current Data Parameters  
NAME Hend M-Othman\_C\_H4  
EXPNO 10  
PROCNO 1

F2 - Acquisition Parameters  
Date\_ 20180611  
Time 16.09  
INSTRUM spect  
PROBHD 5 mm PABBO BB/  
PULPROG zgpg30  
TD 65536  
SOLVENT CDCl3  
NS 1200  
DS 4  
SWH 24038.461 Hz  
FIDRES 0.366798 Hz  
AQ 1.3631488 sec  
RG 202.37  
DW 20.800 usec  
DE 6.50 usec  
TE 298.0 K  
D1 2.00000000 sec  
D11 0.03000000 sec  
TD0 1

===== CHANNEL f1 =====  
SFO1 100.6379178 MHz  
NUC1 13C  
P1 10.00 usec  
PLW1 45.00000000 W

===== CHANNEL f2 =====  
SFO2 400.1916008 MHz  
NUC2 1H  
CPDPRG[2] waltz16

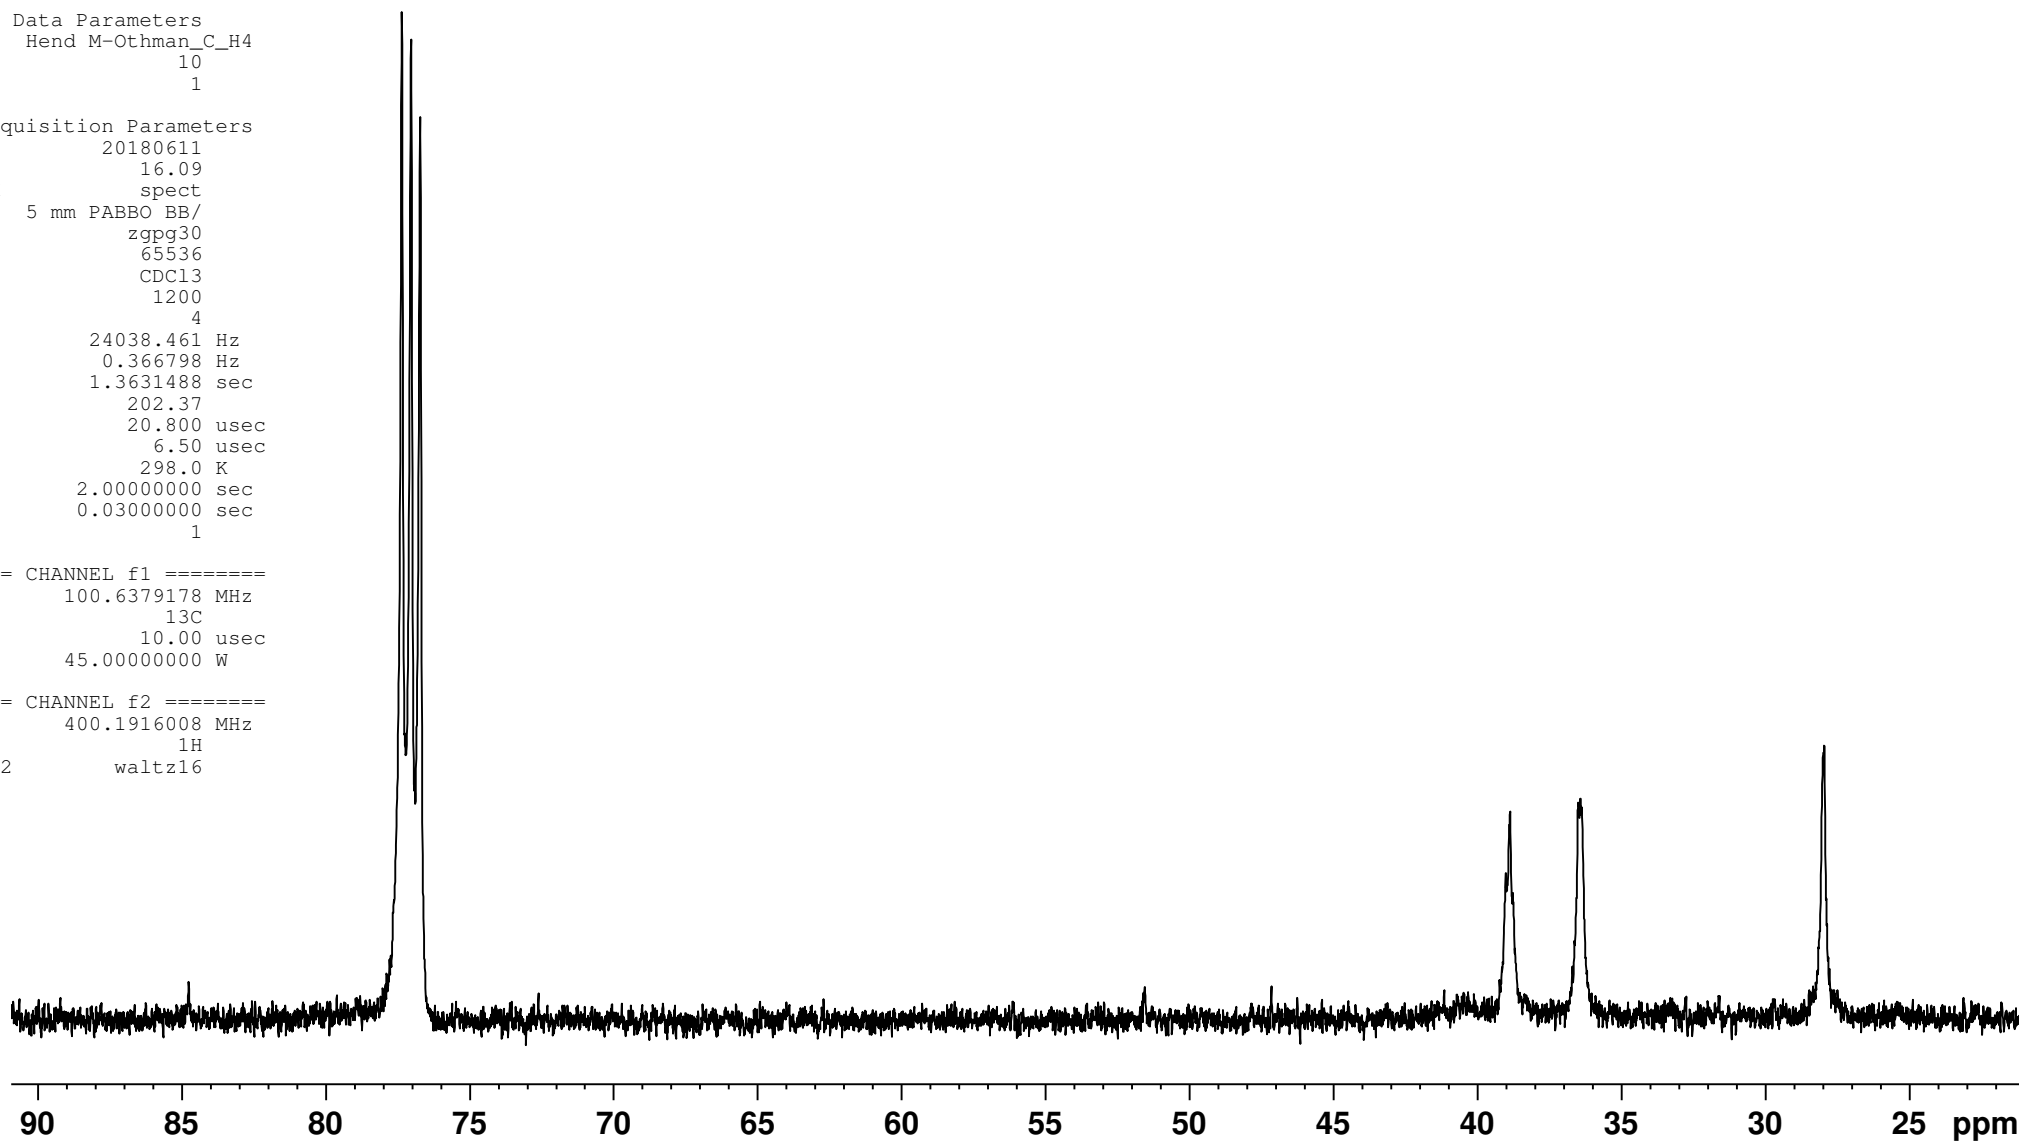

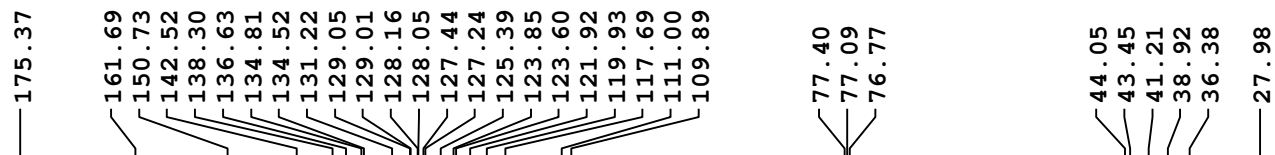

Current Data Parameters  
NAME Hend M-Othman\_C\_H7  
EXPNO 10  
PROCNO 1

F2 - Acquisition Parameters  
Date\_ 20180611  
Time 17.24  
INSTRUM spect  
PROBHD 5 mm PABBO BB/  
PULPROG zgpg30  
TD 65536  
SOLVENT CDC13  
NS 1200  
DS 4  
SWH 24038.461 Hz  
FIDRES 0.366798 Hz  
AQ 1.3631488 sec  
RG 202.37  
DW 20.800 usec  
DE 6.50 usec  
TE 298.1 K  
D1 2.00000000 sec  
D11 0.03000000 sec  
TD0 1

===== CHANNEL f1 =====  
SFO1 100.6379178 MHz  
NUC1 13C  
P1 10.00 usec  
PLW1 45.00000000 W

===== CHANNEL f2 =====  
SFO2 400.1916008 MHz  
NUC2 1H  
CPDPRG[2] waltz16

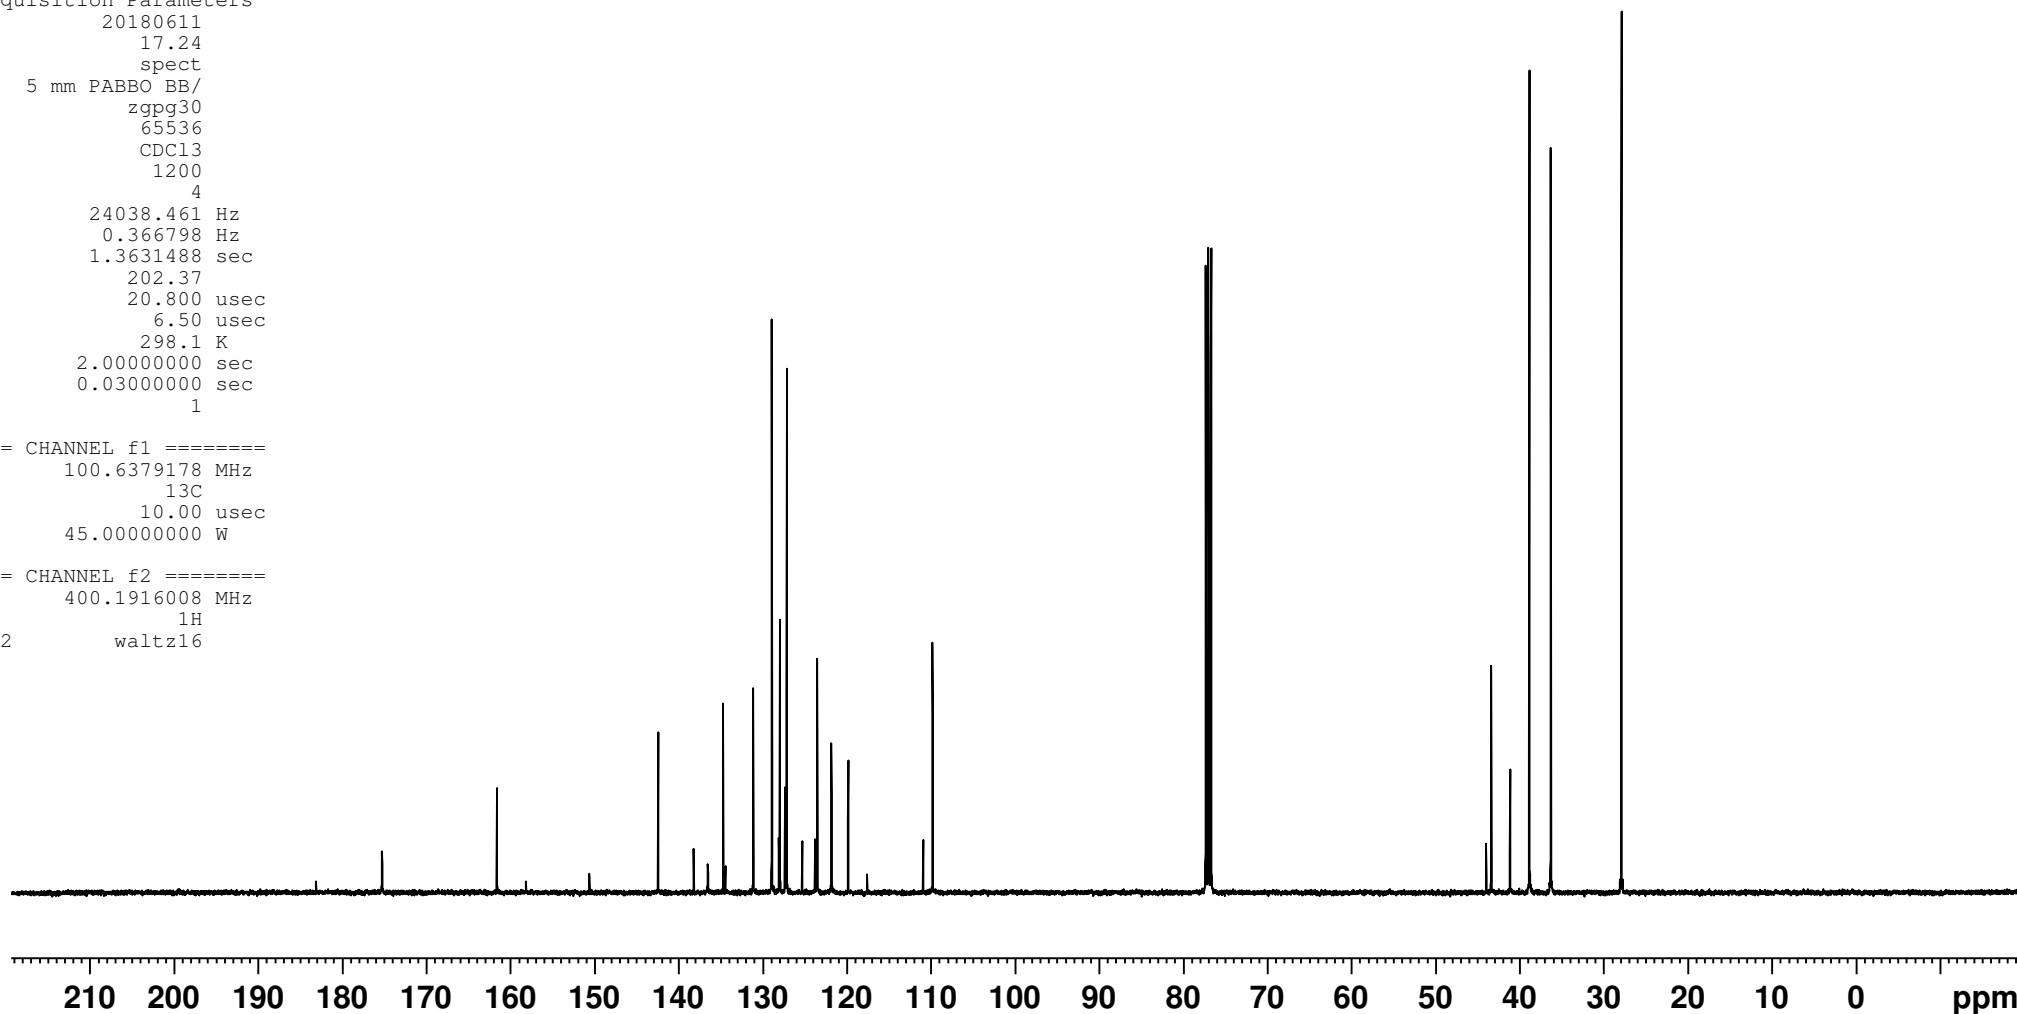

—175.37

—161.69

—150.73

—142.52

—138.30

—136.63

—134.81

—134.52

—131.22

—129.05

—129.01

—128.16

—128.05

—127.44

—127.24

—125.39

—123.85

—123.60

—121.92

—119.93

—117.69

—111.00

—109.89

Current Data Parameters  
NAME Hend M-Othman\_C\_H7  
EXPNO 10  
PROCNO 1

F2 - Acquisition Parameters  
Date\_ 20180611  
Time 17.24  
INSTRUM spect  
PROBHD 5 mm PABBO BB/  
PULPROG zgpg30  
TD 65536  
SOLVENT CDC13  
NS 1200  
DS 4  
SWH 24038.461 Hz  
FIDRES 0.366798 Hz  
AQ 1.3631488 sec  
RG 202.37  
DW 20.800 usec  
DE 6.50 usec  
TE 298.1 K  
D1 2.00000000 sec  
D11 0.03000000 sec  
TDO 1

===== CHANNEL f1 =====  
SFO1 100.6379178 MHz  
NUC1 13C  
P1 10.00 usec  
PLW1 45.00000000 W

===== CHANNEL f2 =====  
SFO2 400.1916008 MHz  
NUC2 1H  
CPDPRG[2] waltz16

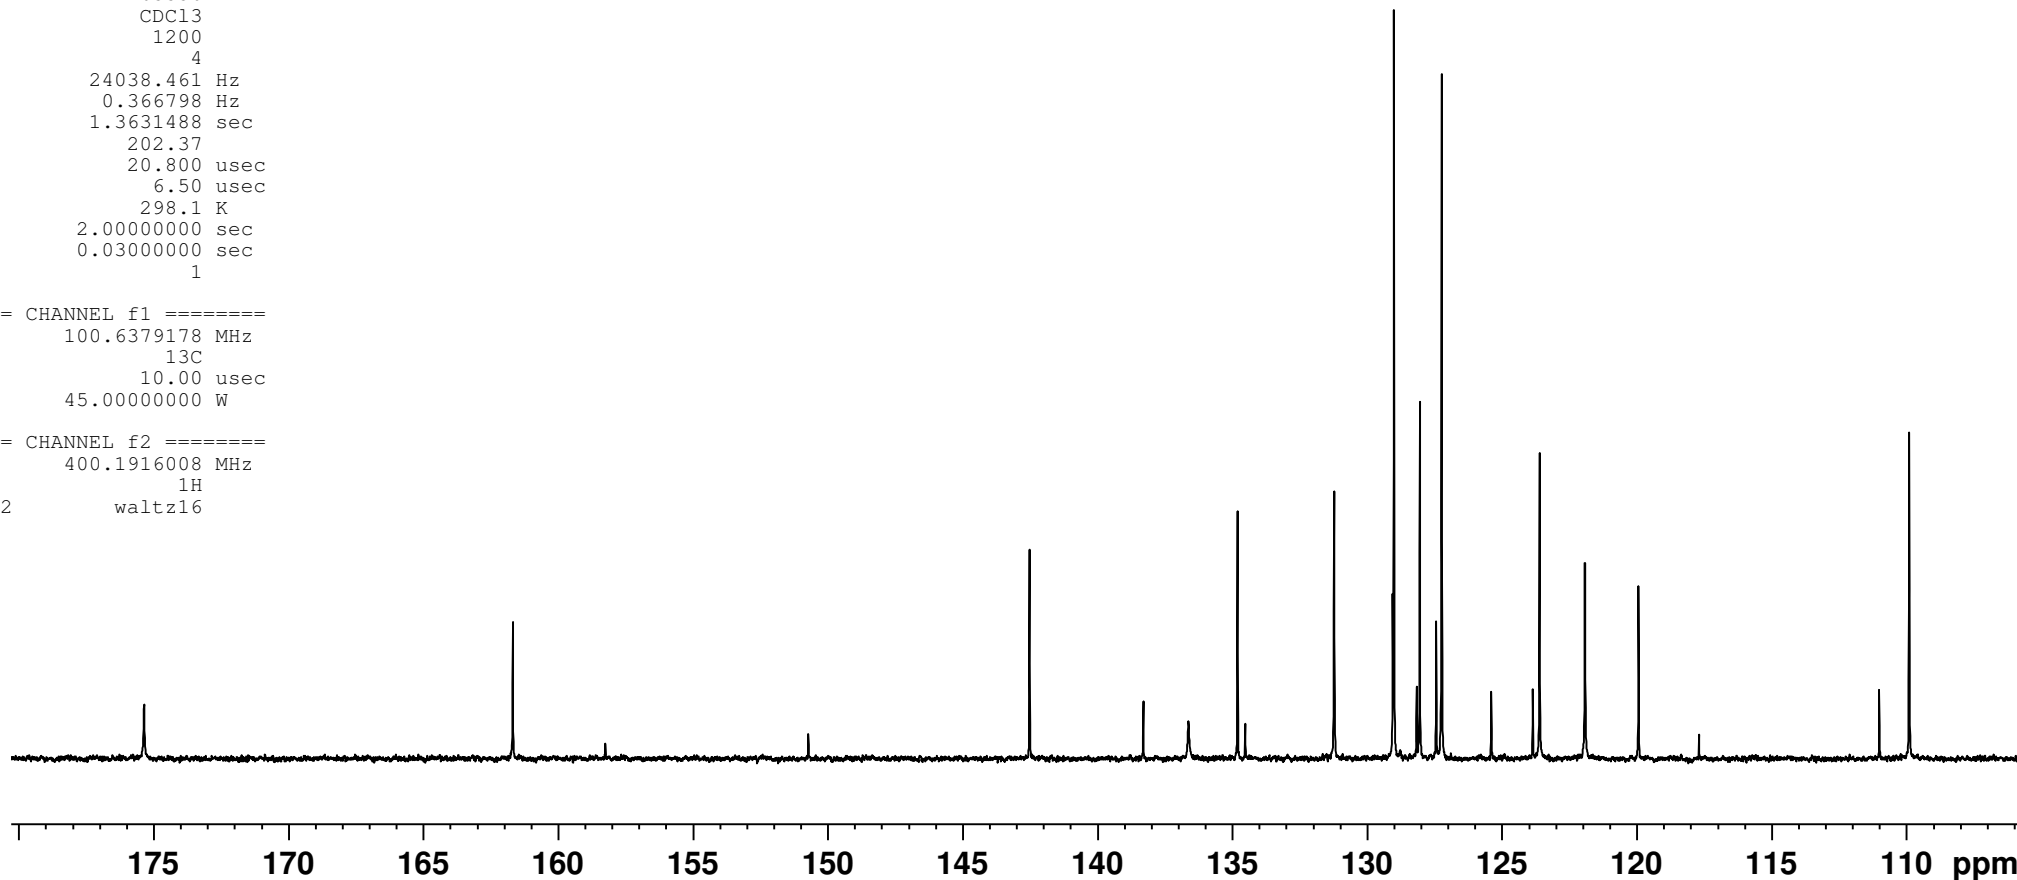

—134.81  
—134.52

—131.22

—129.05  
—129.01—128.16  
—128.05—127.44  
—127.24

—125.39

—123.85  
—123.60

—121.92

—119.93

Current Data Parameters  
NAME Hend M-Othman\_C\_H7  
EXPNO 10  
PROCNO 1

F2 - Acquisition Parameters  
Date\_ 20180611  
Time 17.24  
INSTRUM spect  
PROBHD 5 mm PABBO BB/  
PULPROG zgpg30  
TD 65536  
SOLVENT CDCl3  
NS 1200  
DS 4  
SWH 24038.461 Hz  
FIDRES 0.366798 Hz  
AQ 1.3631488 sec  
RG 202.37  
DW 20.800 usec  
DE 6.50 usec  
TE 298.1 K  
D1 2.00000000 sec  
D11 0.03000000 sec  
TDO 1

===== CHANNEL f1 =====  
SFO1 100.6379178 MHz  
NUC1 13C  
P1 10.00 usec  
PLW1 45.00000000 W

===== CHANNEL f2 =====  
SFO2 400.1916008 MHz  
NUC2 1H  
CPDPRG[2] waltz16

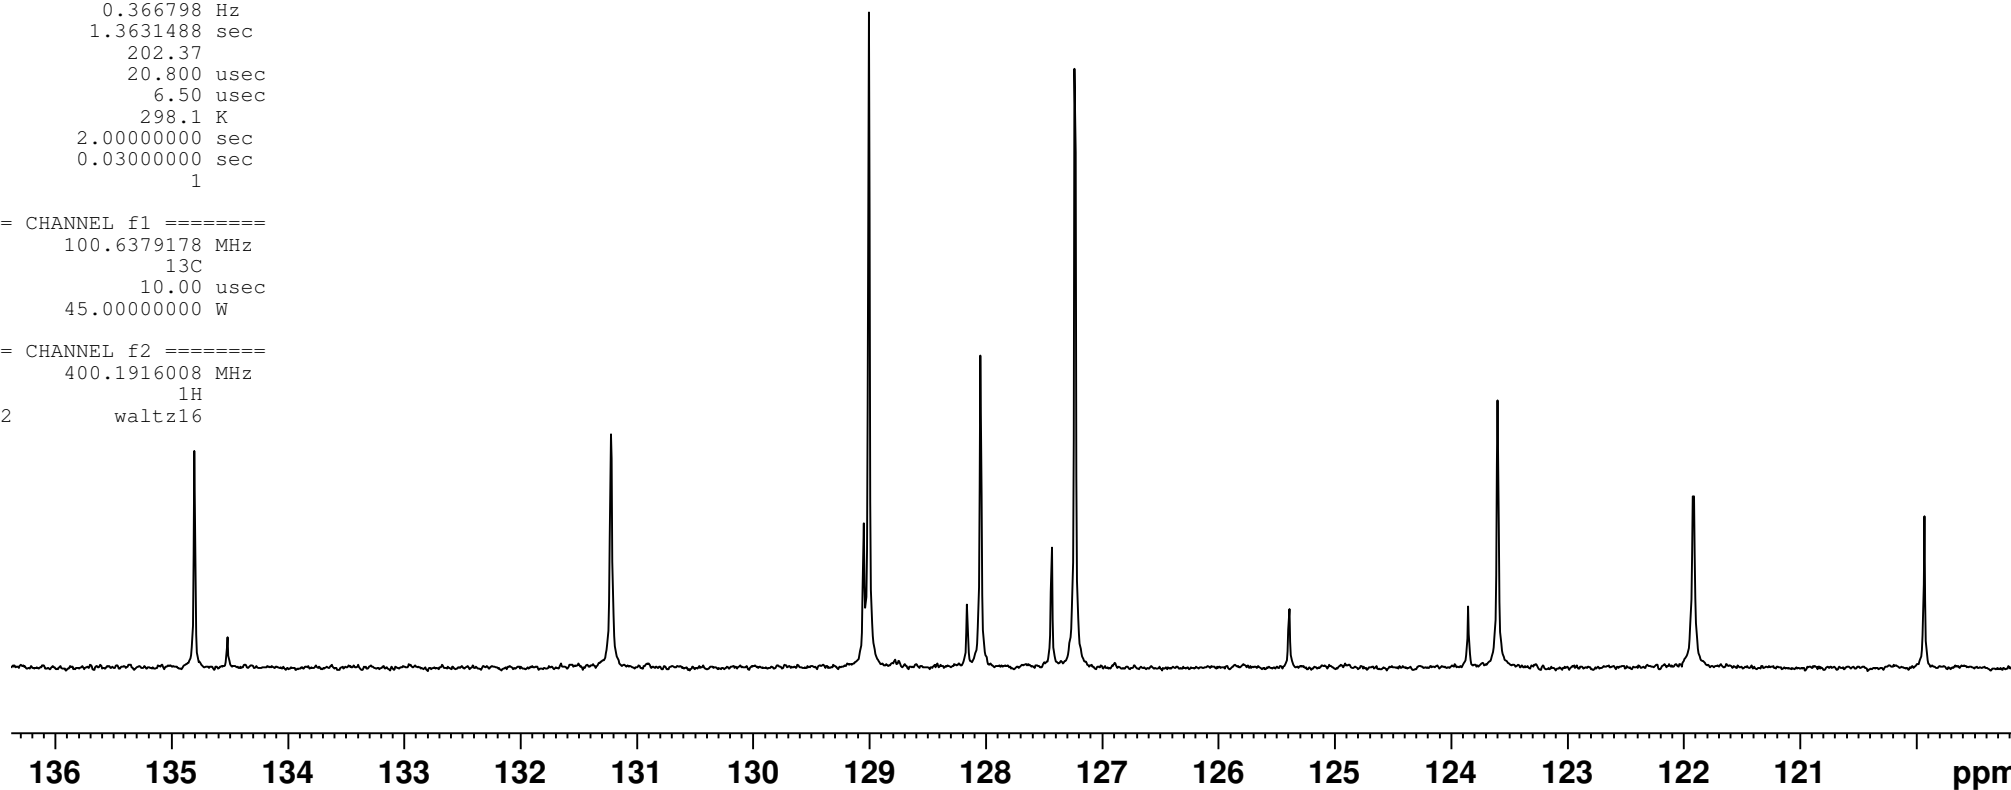

— 111.00  
— 109.89

77.40  
77.09  
76.77

Current Data Parameters  
NAME Hend M-Othman\_C\_H7  
EXPNO 10  
PROCNO 1

F2 - Acquisition Parameters  
Date\_ 20180611  
Time 17.24  
INSTRUM spect  
PROBHD 5 mm PABBO BB/  
PULPROG zgpg30  
TD 65536  
SOLVENT CDCl3  
NS 1200  
DS 4  
SWH 24038.461 Hz  
FIDRES 0.366798 Hz  
AQ 1.3631488 sec  
RG 202.37  
DW 20.800 usec  
DE 6.50 usec  
TE 298.1 K  
D1 2.00000000 sec  
D11 0.03000000 sec  
TDO 1

==== CHANNEL f1 =====  
SFO1 100.6379178 MHz  
NUC1 13C  
P1 10.00 usec  
PLW1 45.00000000 W

==== CHANNEL f2 =====  
SFO2 400.1916008 MHz  
NUC2 1H  
CPDPRG[2] waltz16

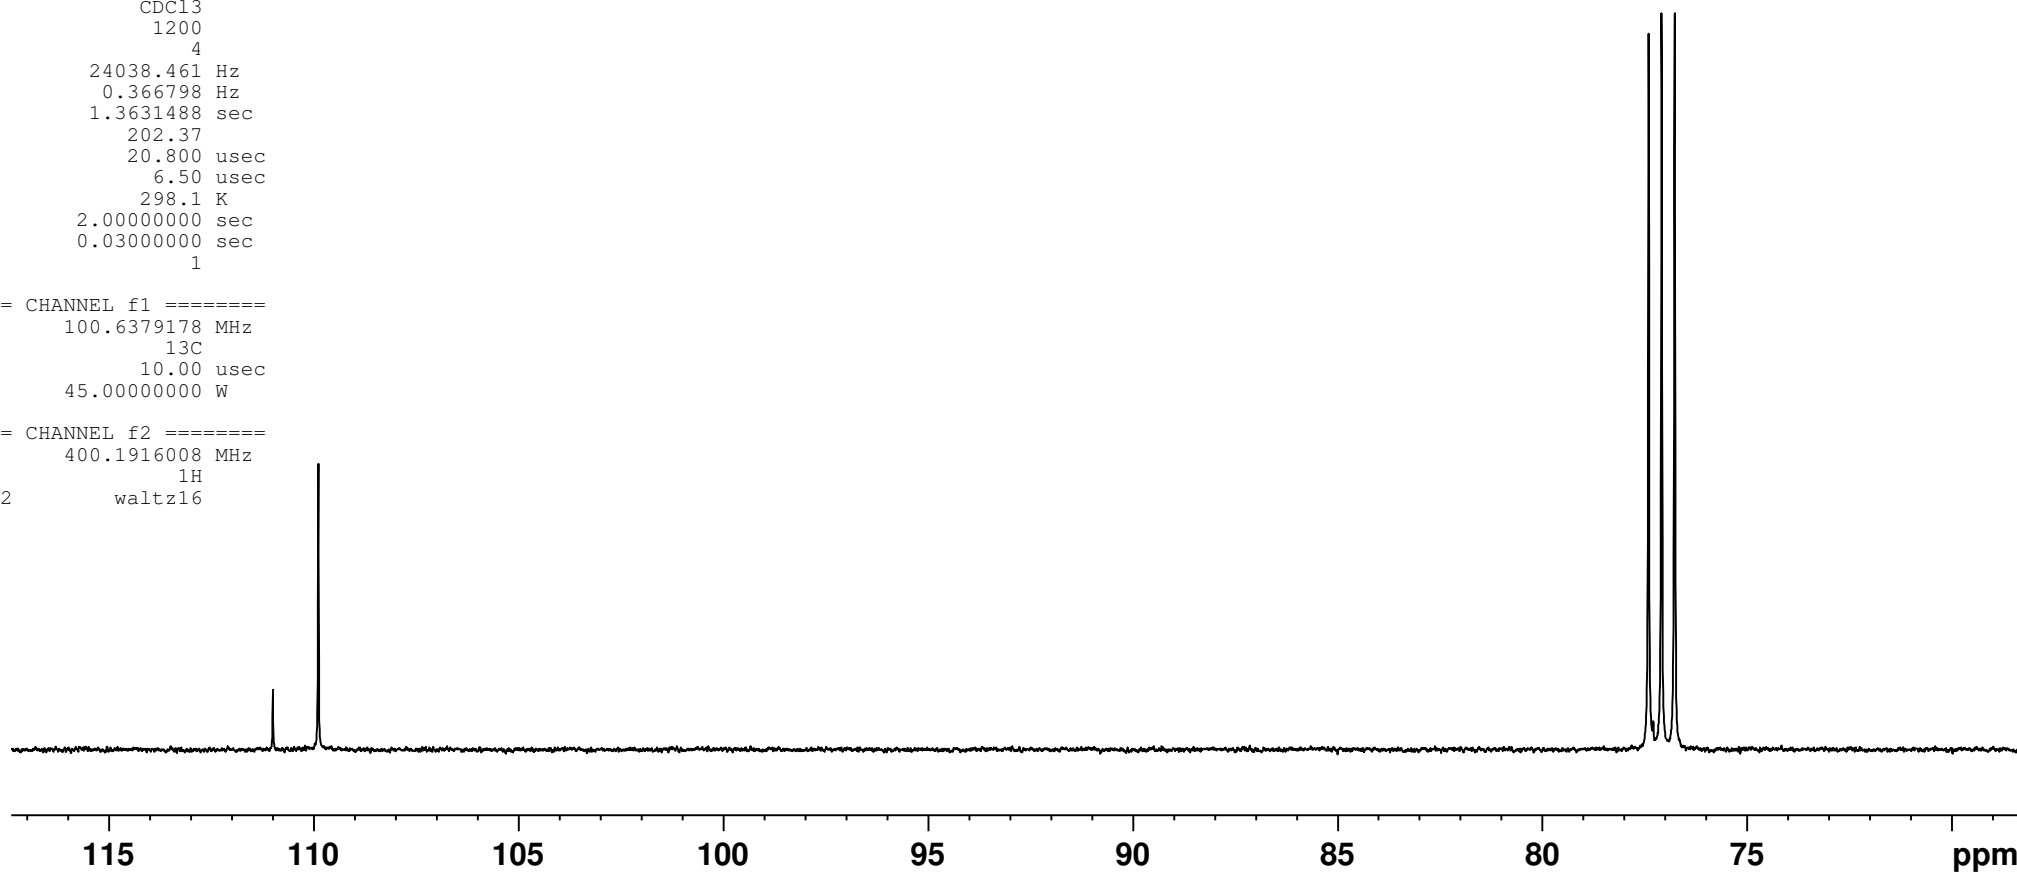

— 44.05  
— 43.45  
  
— 41.21  
  
— 38.92  
  
— 36.38  
  
  
— 27.98

Current Data Parameters  
NAME Hend M-Othman\_C\_H7  
EXPNO 10  
PROCNO 1

F2 - Acquisition Parameters  
Date\_ 20180611  
Time 17.24  
INSTRUM spect  
PROBHD 5 mm PABBO BB/  
PULPROG zgpg30  
TD 65536  
SOLVENT CDCl3  
NS 1200  
DS 4  
SWH 24038.461 Hz  
FIDRES 0.366798 Hz  
AQ 1.3631488 sec  
RG 202.37  
DW 20.800 usec  
DE 6.50 usec  
TE 298.1 K  
D1 2.00000000 sec  
D11 0.03000000 sec  
TDO 1

===== CHANNEL f1 =====  
SFO1 100.6379178 MHz  
NUC1 13C  
P1 10.00 usec  
PLW1 45.00000000 W

===== CHANNEL f2 =====  
SFO2 400.1916008 MHz  
NUC2 1H  
CPDPRG[2] waltz16

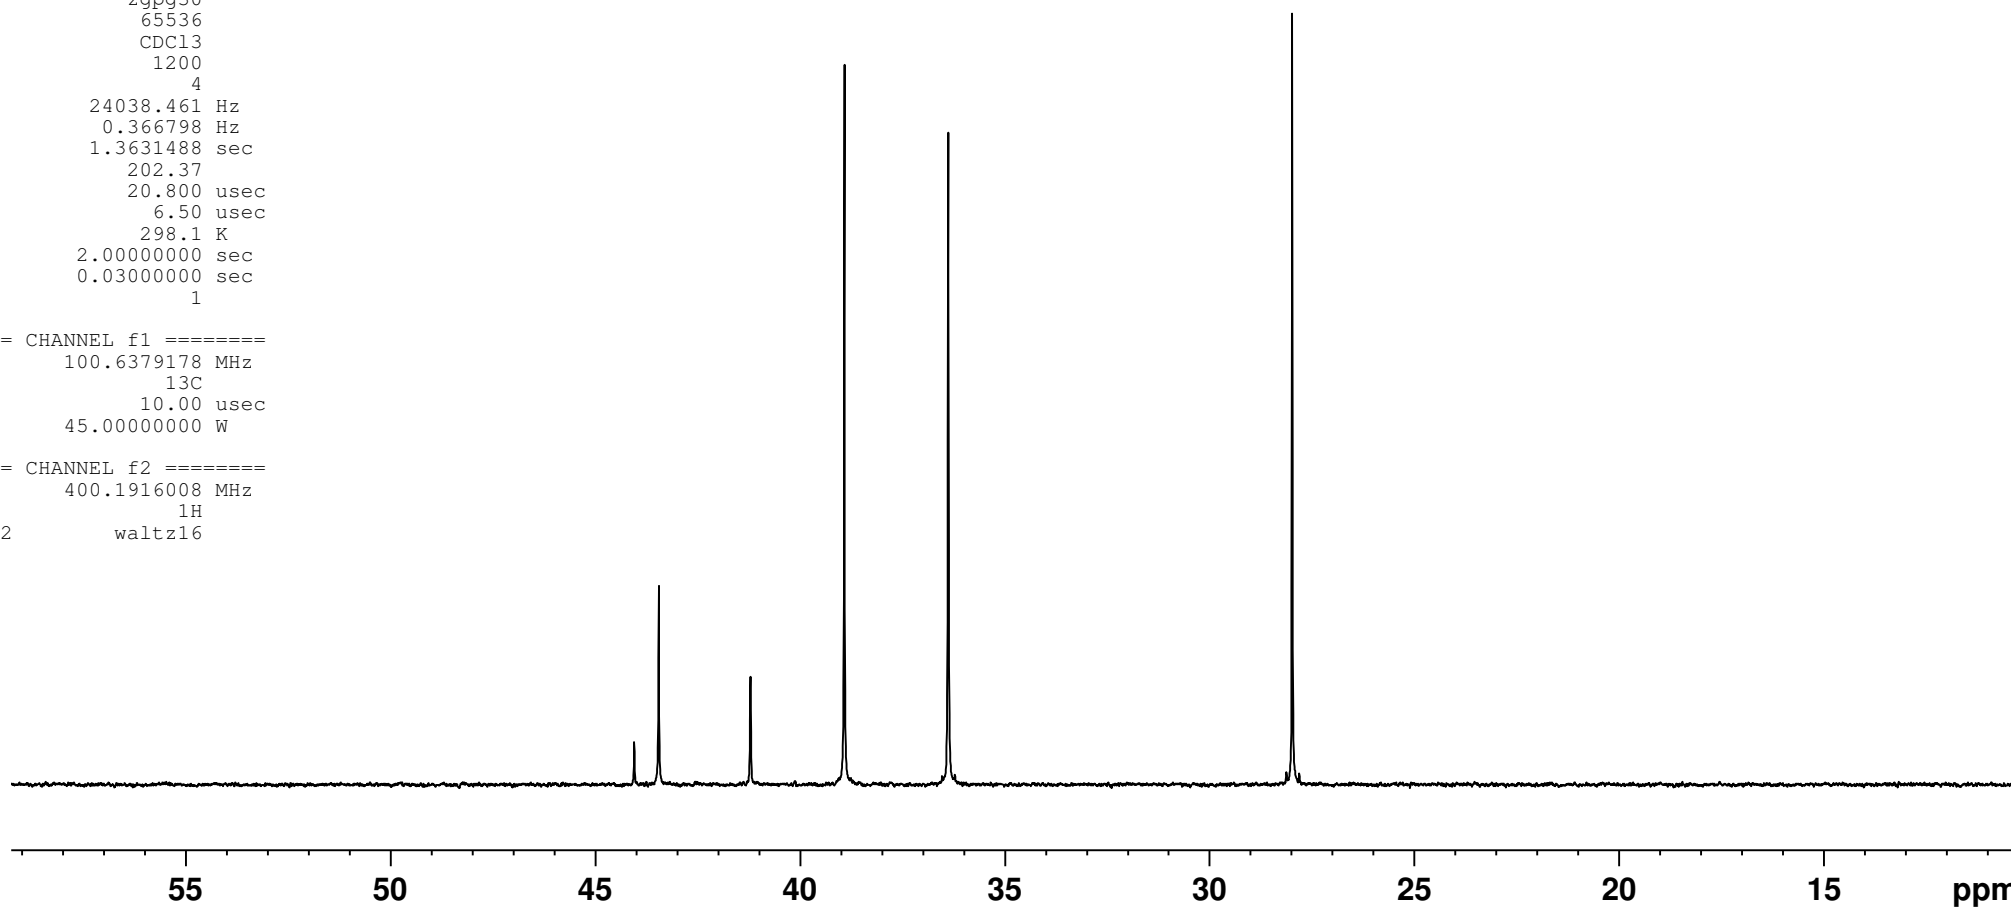

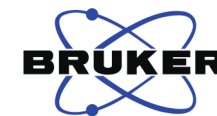

—176.76  
—161.42  
—143.28  
—131.98  
—123.62  
—121.04  
—119.74  
—110.62

40.61  
40.40  
40.19  
39.99  
39.78  
39.57  
39.49  
39.36  
39.05  
38.80  
36.61  
36.31  
31.71  
29.33  
29.10  
29.03  
28.68  
28.19  
28.04  
27.84  
27.37  
26.64  
22.53  
14.39

Current Data Parameters  
NAME Hend M-Othman\_C\_H8  
EXPNO 10  
PROCNO 1

F2 - Acquisition Parameters  
Date\_ 20180612  
Time 0.57  
INSTRUM spect  
PROBHD 5 mm PABBO BB/  
PULPROG zgpg30  
TD 65536  
SOLVENT DMSO  
NS 1200  
DS 4  
SWH 24038.461 Hz  
FIDRES 0.366798 Hz  
AQ 1.3631488 sec  
RG 202.37  
DW 20.800 usec  
DE 6.50 usec  
TE 298.1 K  
D1 2.00000000 sec  
D11 0.03000000 sec  
TD0 1

===== CHANNEL f1 =====  
SFO1 100.6379178 MHz  
NUC1 13C  
P1 10.00 usec  
PLW1 45.00000000 W

===== CHANNEL f2 =====  
SFO2 400.1916008 MHz  
NUC2 1H  
CPDPRG[2] waltz16

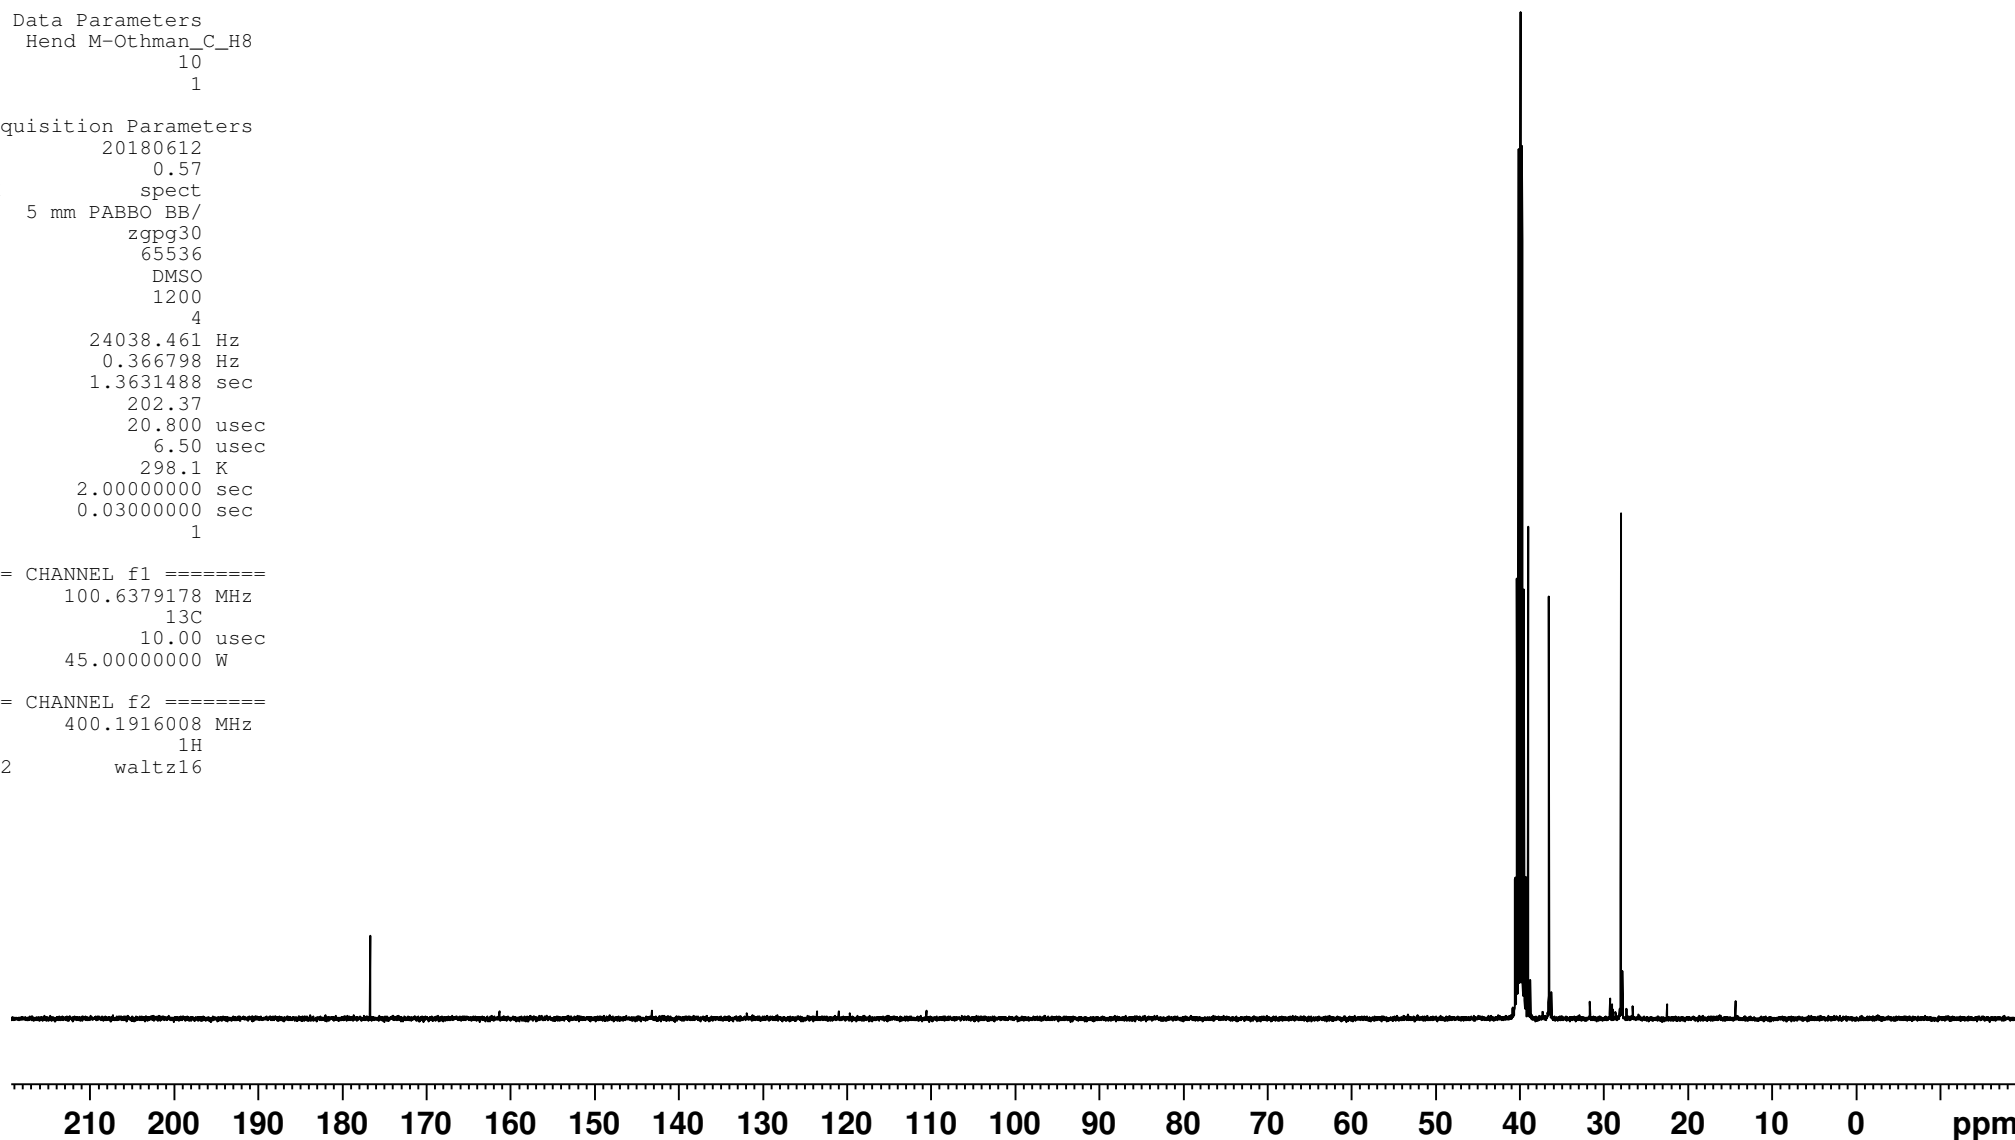



—176.76 —161.42 —143.28 —131.98 —123.62 —121.04 —119.74 —110.62

40.61 40.40 40.19 39.99 39.78 39.57 39.49 39.36 39.05 38.80 36.61 36.31 31.71 29.33 29.10 29.03 28.68 28.19 28.04 27.84 27.37 26.64 22.53 14.39

Current Data Parameters  
NAME Hend M-Othman\_C\_H8  
EXPNO 10  
PROCNO 1

F2 - Acquisition Parameters  
Date\_ 20180612  
Time 0.57  
INSTRUM spect  
PROBHD 5 mm PABBO BB/  
PULPROG zgpg30  
TD 65536  
SOLVENT DMSO  
NS 1200  
DS 4  
SWH 24038.461 Hz  
FIDRES 0.366798 Hz  
AQ 1.3631488 sec  
RG 202.37  
DW 20.800 usec  
DE 6.50 usec  
TE 298.1 K  
D1 2.00000000 sec  
D11 0.03000000 sec  
TD0 1

==== CHANNEL f1 =====  
SFO1 100.6379178 MHz  
NUC1 13C  
P1 10.00 usec  
PLW1 45.00000000 W

==== CHANNEL f2 =====  
SFO2 400.1916008 MHz  
NUC2 1H  
CPDPRG[2] waltz16

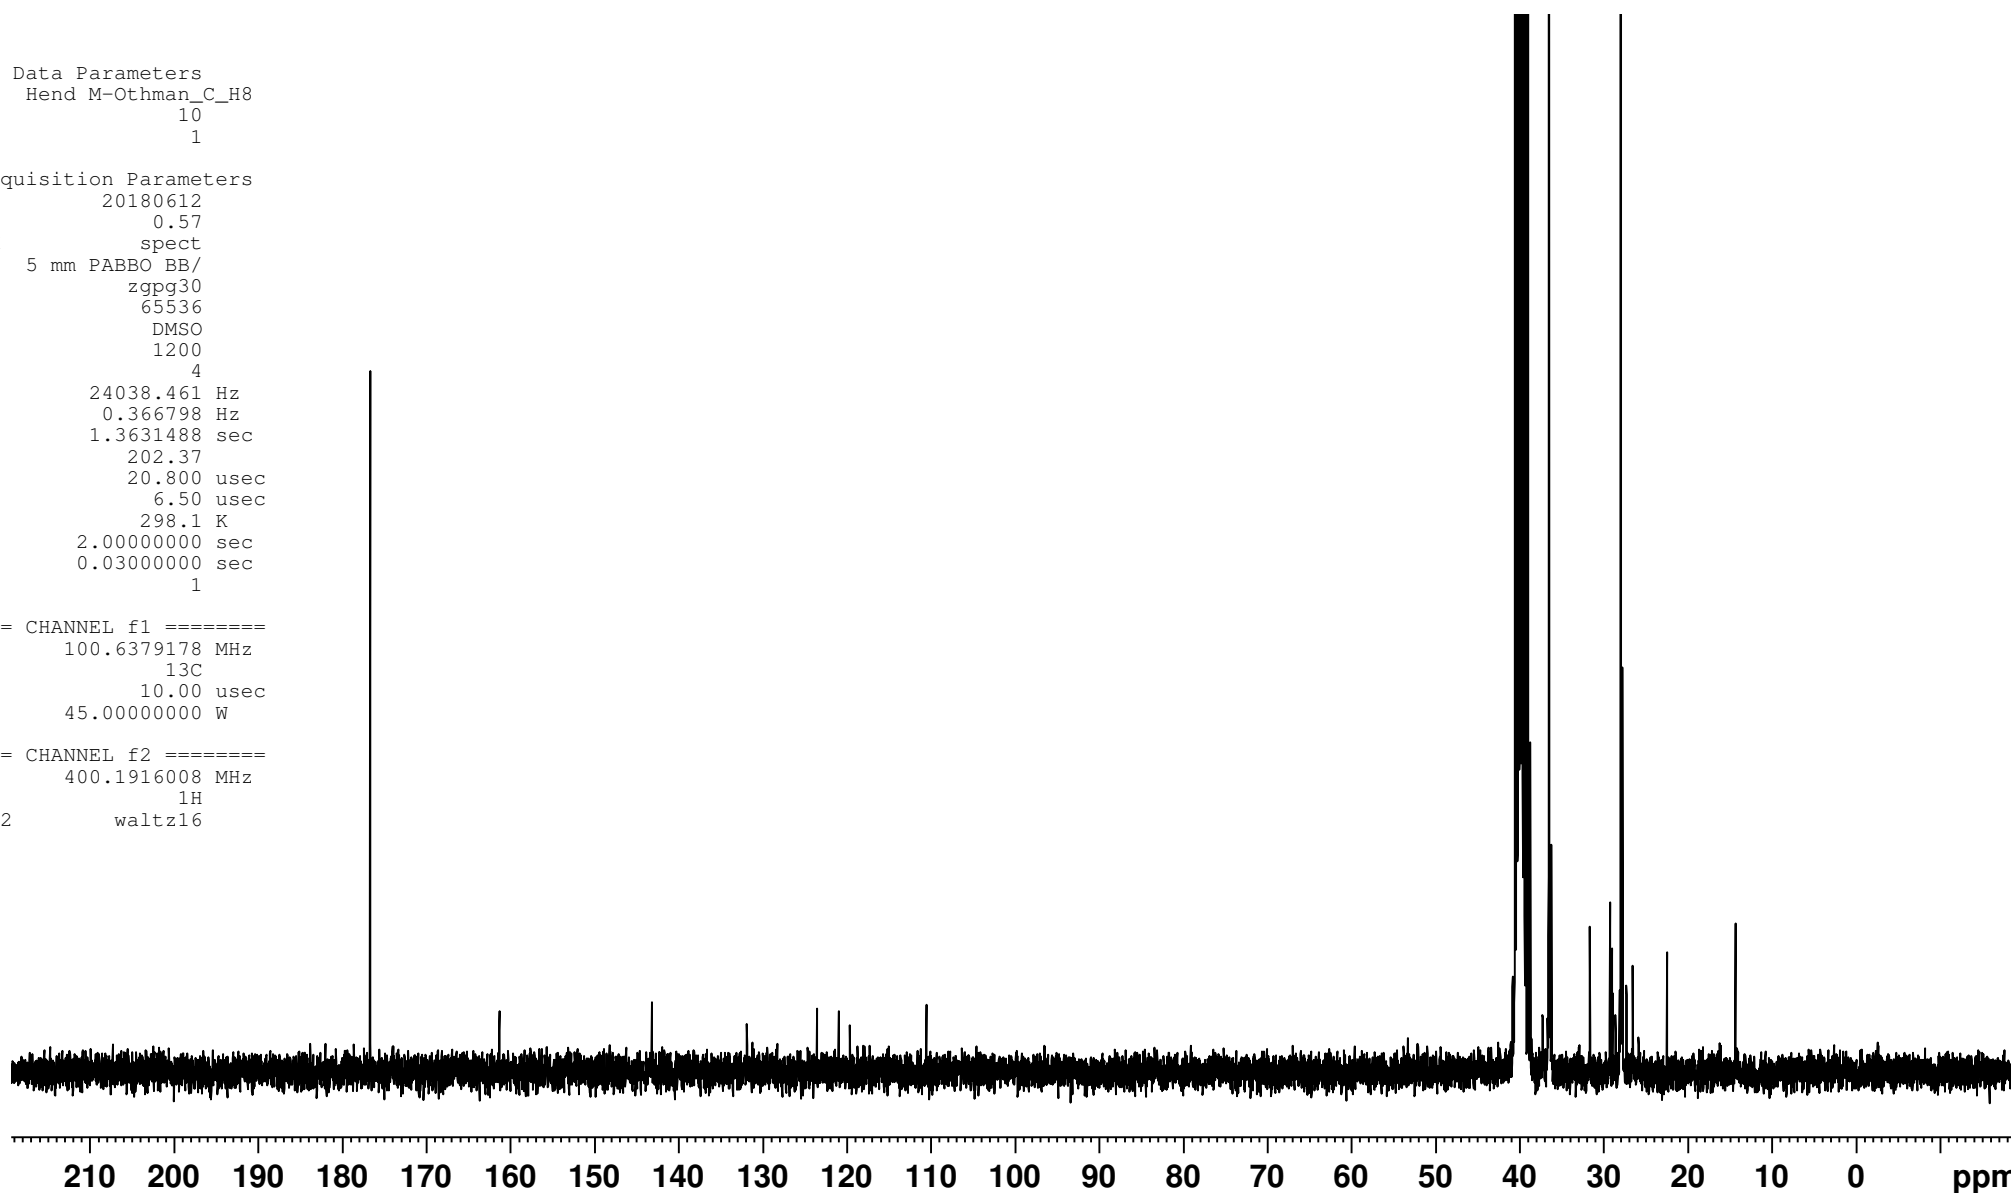



—176.76

—161.42

—143.28

—131.98

—123.62

—121.04

—119.74

—110.62

Current Data Parameters  
NAME Hend M-Othman\_C\_H8  
EXPNO 10  
PROCNO 1

F2 - Acquisition Parameters  
Date\_ 20180612  
Time 0.57  
INSTRUM spect  
PROBHD 5 mm PABBO BB/  
PULPROG zgpg30  
TD 65536  
SOLVENT DMSO  
NS 1200  
DS 4  
SWH 24038.461 Hz  
FIDRES 0.366798 Hz  
AQ 1.3631488 sec  
RG 202.37  
DW 20.800 usec  
DE 6.50 usec  
TE 298.1 K  
D1 2.00000000 sec  
D11 0.03000000 sec  
TD0 1

===== CHANNEL f1 =====  
SFO1 100.6379178 MHz  
NUC1 13C  
P1 10.00 usec  
PLW1 45.00000000 W

===== CHANNEL f2 =====  
SFO2 400.1916008 MHz  
NUC2 1H  
CPDPRG[2] waltz16

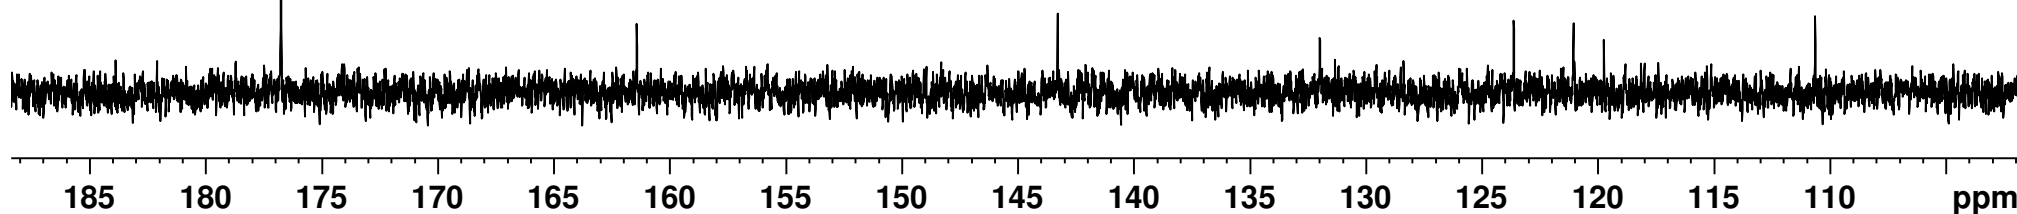



40.61  
40.40  
40.19  
39.99  
39.78  
39.57  
39.49  
39.36  
39.05  
38.80  
36.61  
36.31

31.71

29.33  
29.10  
29.03  
28.68  
28.19  
28.04  
27.84  
27.37  
26.64

22.53

14.39

Current Data Parameters  
NAME Hend M-Othman\_C\_H8  
EXPNO 10  
PROCNO 1

F2 - Acquisition Parameters  
Date\_ 20180612  
Time 0.57  
INSTRUM spect  
PROBHD 5 mm PABBO BB/  
PULPROG zgpg30  
TD 65536  
SOLVENT DMSO  
NS 1200  
DS 4  
SWH 24038.461 Hz  
FIDRES 0.366798 Hz  
AQ 1.3631488 sec  
RG 202.37  
DW 20.800 usec  
DE 6.50 usec  
TE 298.1 K  
D1 2.00000000 sec  
D11 0.03000000 sec  
TDO 1

===== CHANNEL f1 =====  
SFO1 100.6379178 MHz  
NUC1 13C  
P1 10.00 usec  
PLW1 45.00000000 W

===== CHANNEL f2 =====  
SFO2 400.1916008 MHz  
NUC2 1H  
CPDPRG[2] waltz16

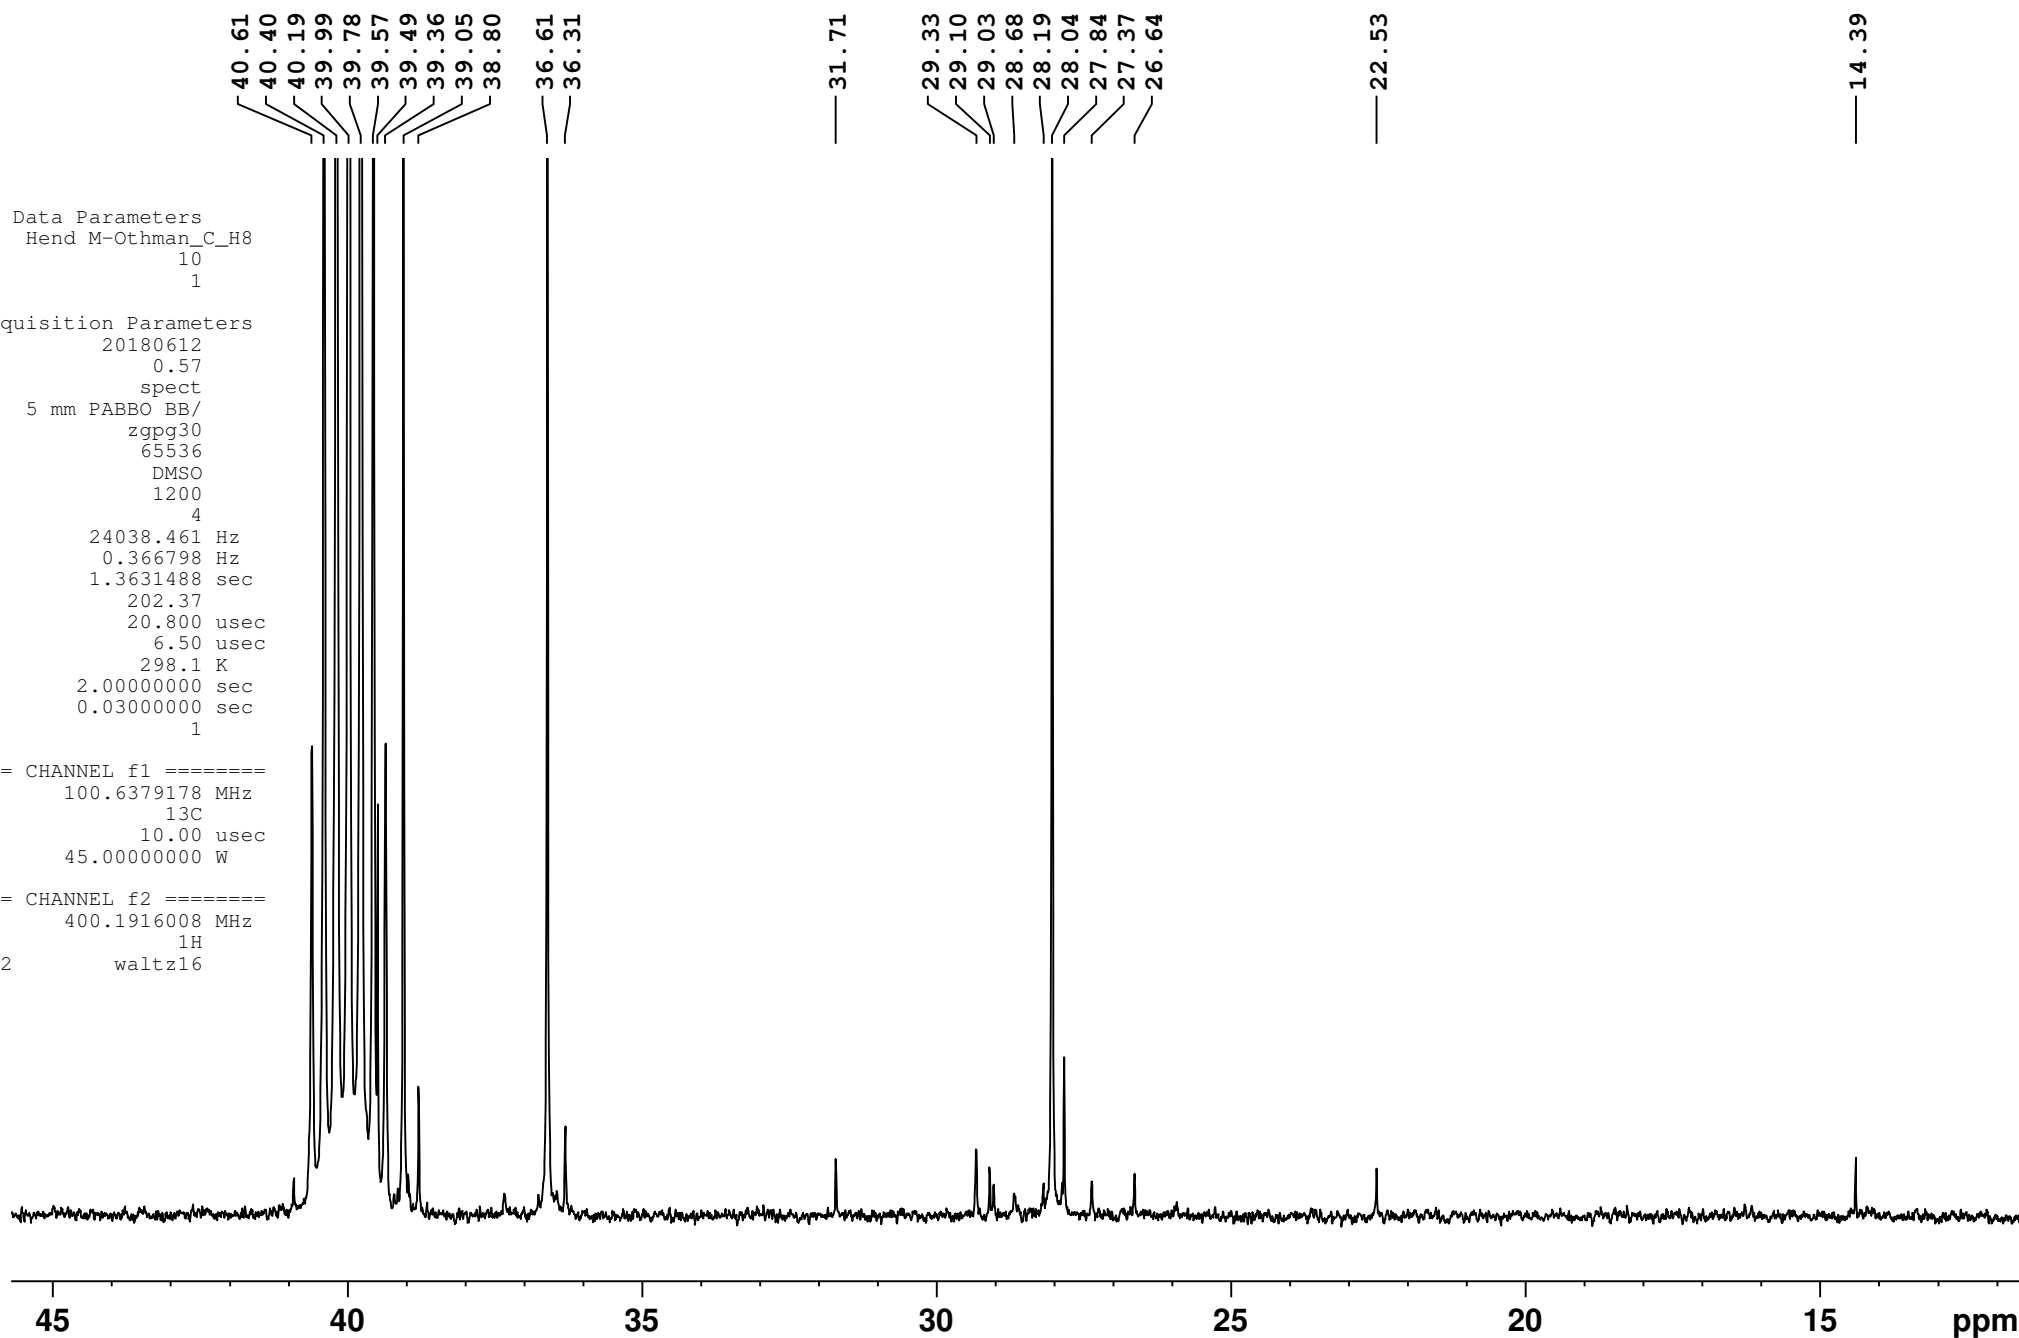



40.61  
40.40  
40.19  
39.99  
39.78  
39.57  
39.49  
39.36  
39.05  
38.80  
36.61  
36.31

31.71

29.33  
29.10  
29.03  
28.68  
28.19  
28.04  
27.84  
27.37  
26.64

22.53

14.39

Current Data Parameters  
NAME Hend M-Othman\_C\_H8  
EXPNO 10  
PROCNO 1

F2 - Acquisition Parameters  
Date\_ 20180612  
Time 0.57  
INSTRUM spect  
PROBHD 5 mm PABBO BB/  
PULPROG zgpg30  
TD 65536  
SOLVENT DMSO  
NS 1200  
DS 4  
SWH 24038.461 Hz  
FIDRES 0.366798 Hz  
AQ 1.3631488 sec  
RG 202.37  
DW 20.800 usec  
DE 6.50 usec  
TE 298.1 K  
D1 2.00000000 sec  
D11 0.03000000 sec  
TD0 1

===== CHANNEL f1 =====  
SFO1 100.6379178 MHz  
NUC1 13C  
P1 10.00 usec  
PLW1 45.00000000 W

===== CHANNEL f2 =====  
SFO2 400.1916008 MHz  
NUC2 1H  
CPDPRG[2] waltz16

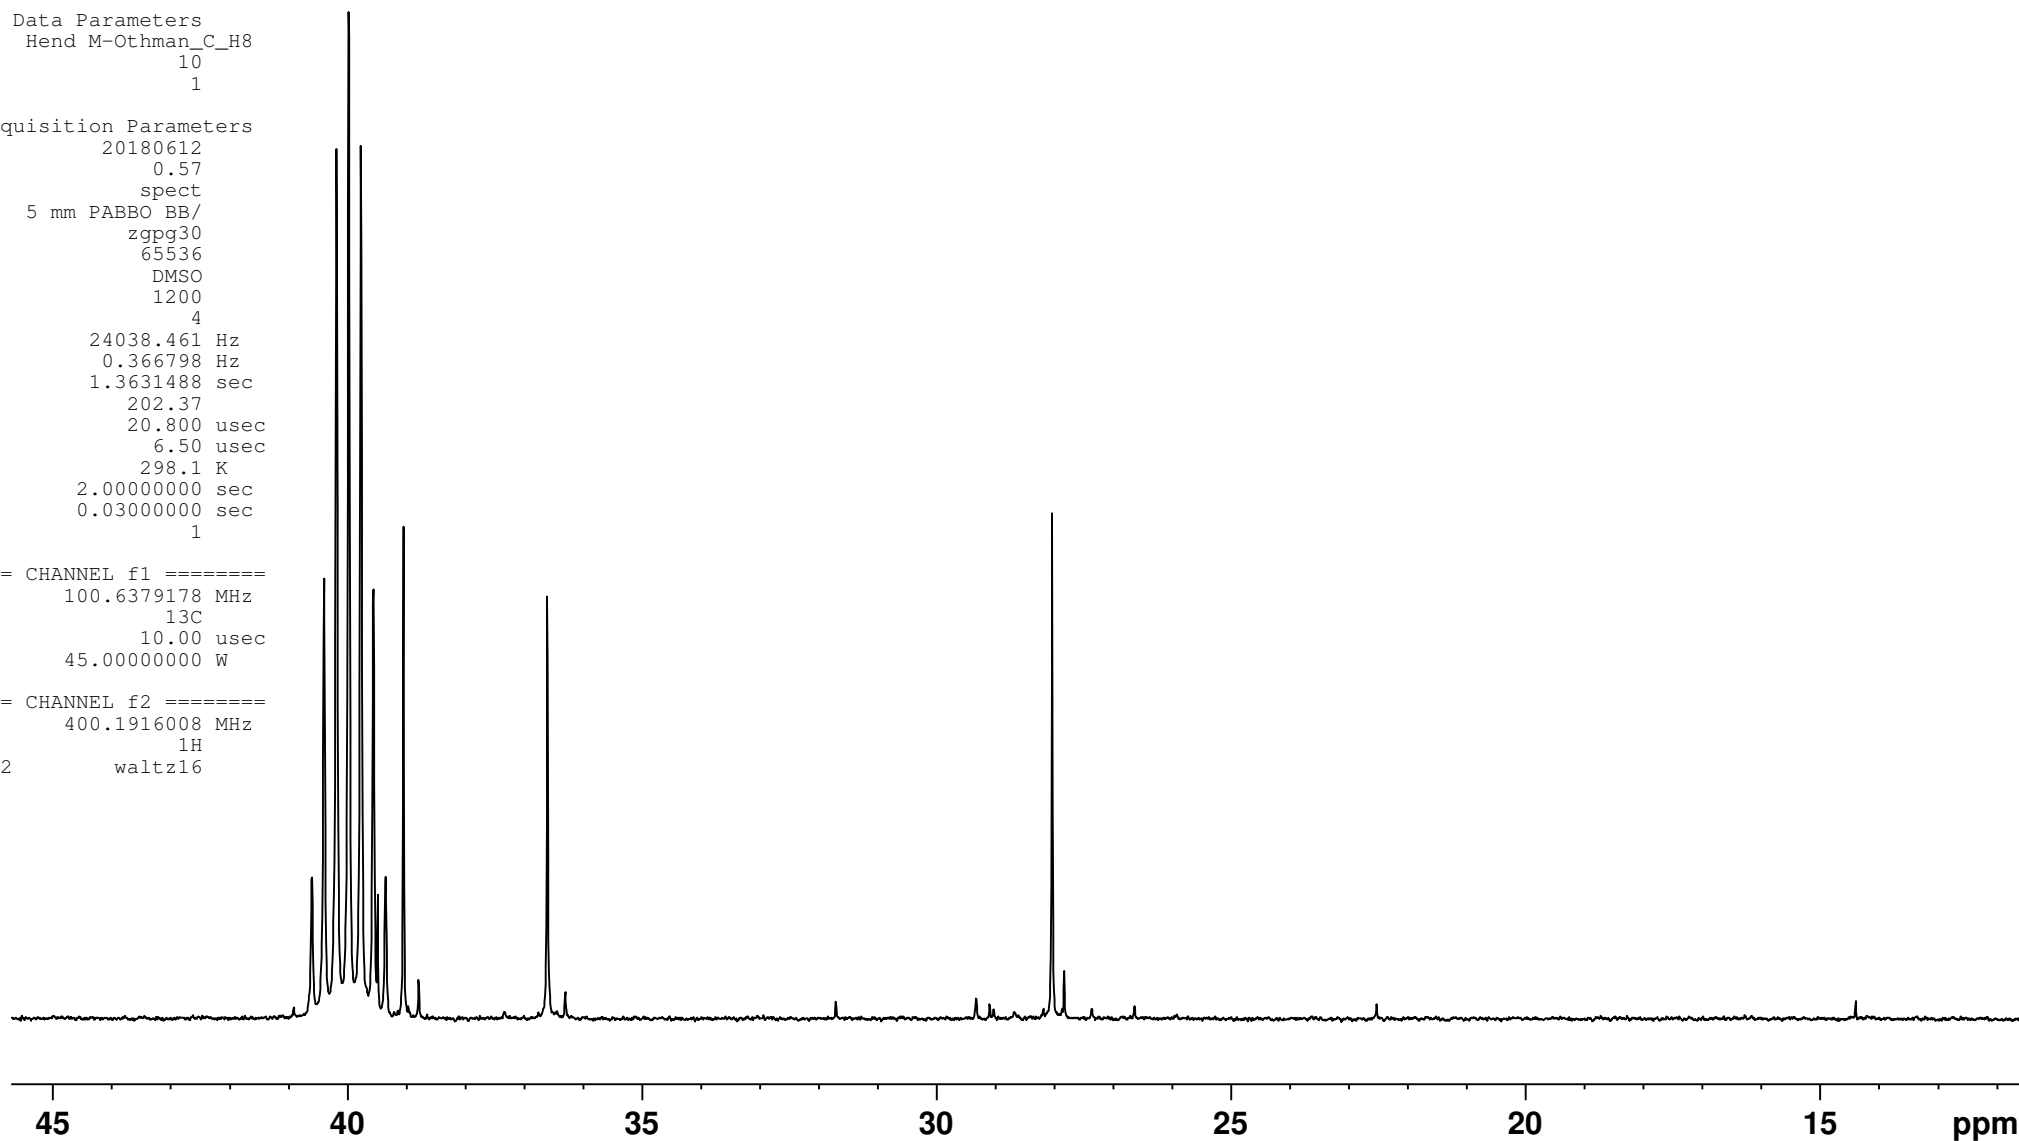



— 40.61  
— 40.40  
— 40.19  
— 39.99  
— 39.78  
— 39.57  
— 39.49  
— 39.36  
— 39.05  
— 38.80  
  
— 36.61  
— 36.31

Current Data Parameters  
NAME Hend M-Othman\_C\_H8  
EXPNO 10  
PROCNO 1

F2 - Acquisition Parameters  
Date\_ 20180612  
Time 0.57  
INSTRUM spect  
PROBHD 5 mm PABBO BB/  
PULPROG zgpg30  
TD 65536  
SOLVENT DMSO  
NS 1200  
DS 4  
SWH 24038.461 Hz  
FIDRES 0.366798 Hz  
AQ 1.3631488 sec  
RG 202.37  
DW 20.800 usec  
DE 6.50 usec  
TE 298.1 K  
D1 2.00000000 sec  
D11 0.03000000 sec  
TDO 1

===== CHANNEL f1 =====  
SFO1 100.6379178 MHz  
NUC1 13C  
P1 10.00 usec  
PLW1 45.00000000 W

===== CHANNEL f2 =====  
SFO2 400.1916008 MHz  
NUC2 1H  
CPDPRG[2] waltz16

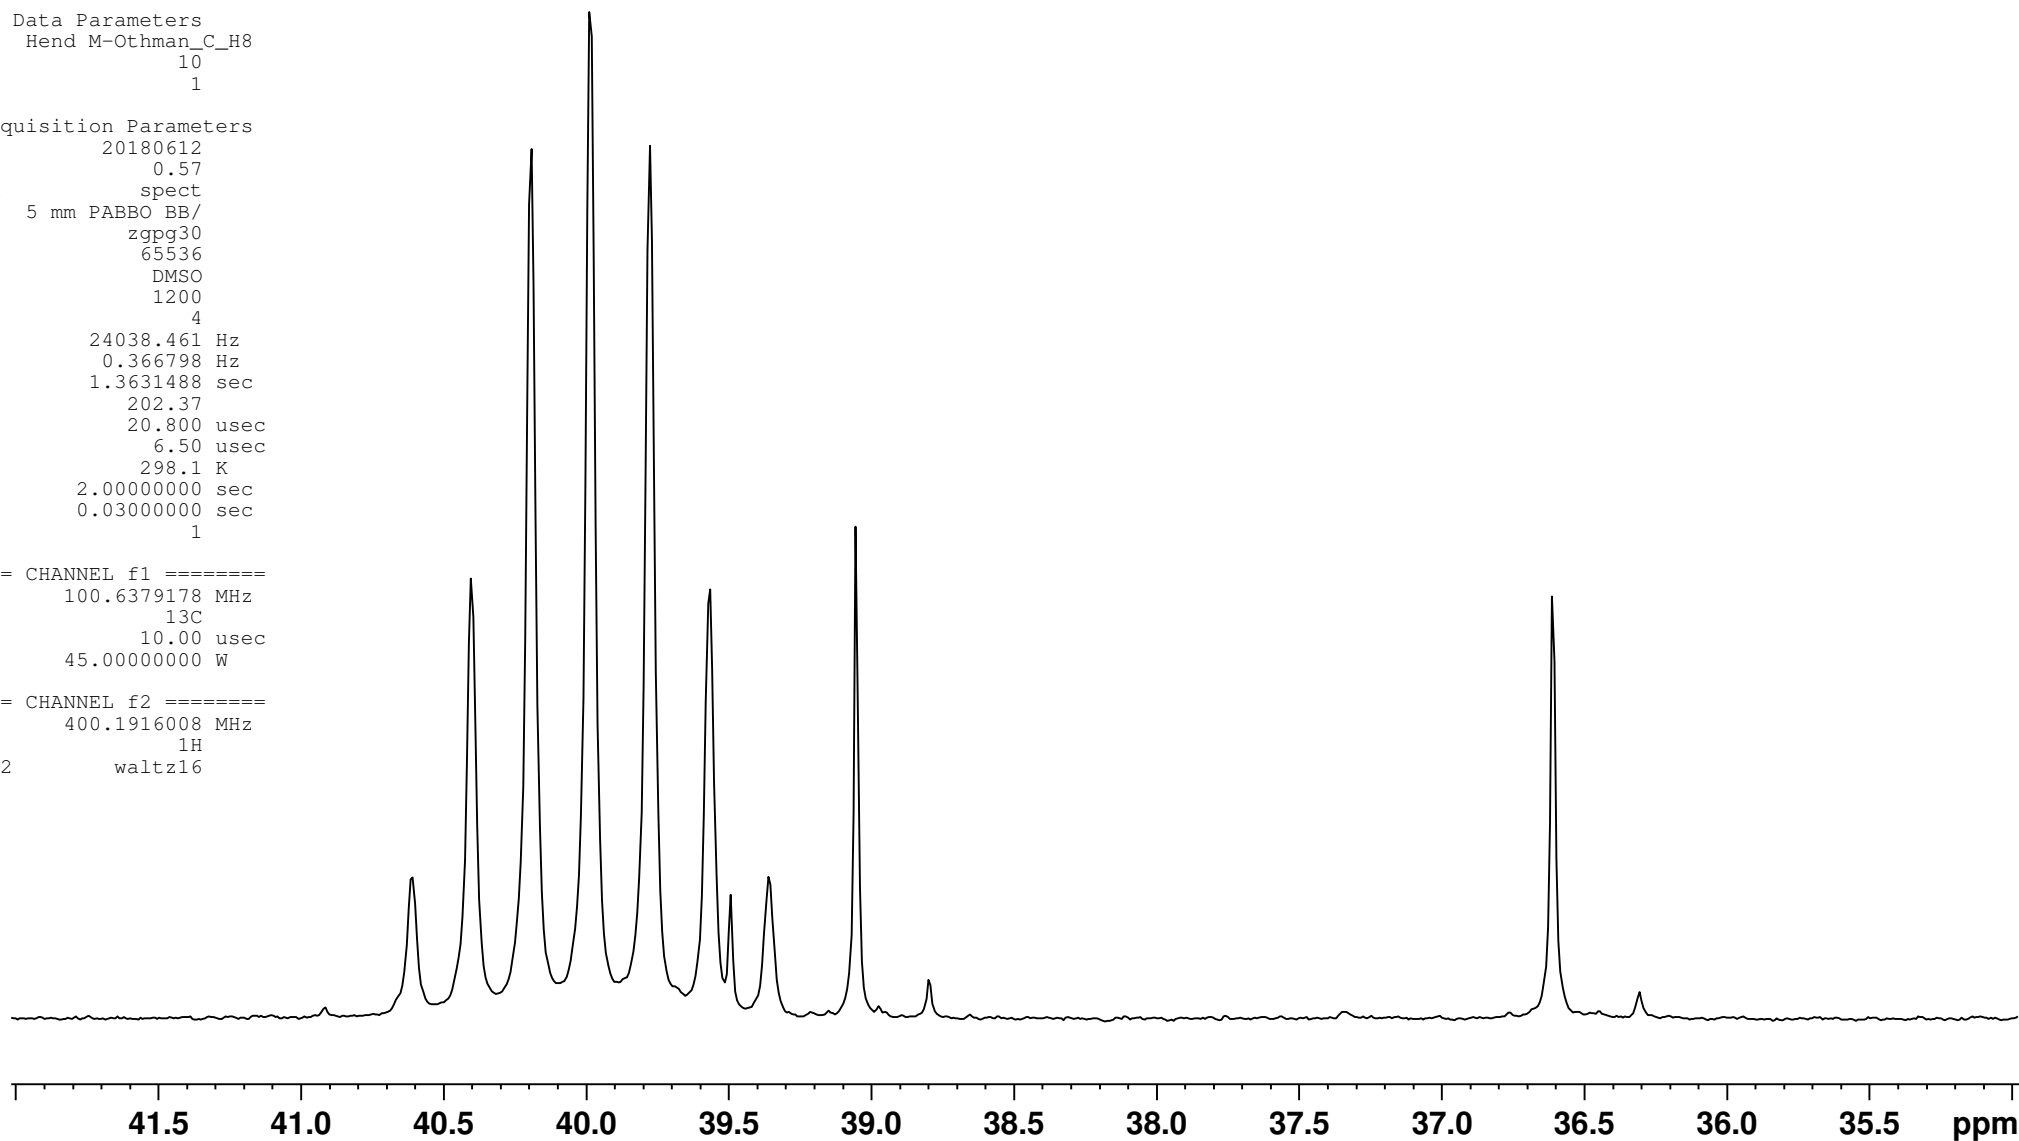



— 31.71

— 29.33

— 29.10

— 29.03

— 28.68

— 28.19

— 28.04

— 27.84

— 27.37

— 26.64

— 22.53

— 14.39

Current Data Parameters  
NAME Hend M-Othman\_C\_H8  
EXPNO 10  
PROCNO 1

F2 - Acquisition Parameters  
Date\_ 20180612  
Time 0.57  
INSTRUM spect  
PROBHD 5 mm PABBO BB/  
PULPROG zgpg30  
TD 65536  
SOLVENT DMSO  
NS 1200  
DS 4  
SWH 24038.461 Hz  
FIDRES 0.366798 Hz  
AQ 1.3631488 sec  
RG 202.37  
DW 20.800 usec  
DE 6.50 usec  
TE 298.1 K  
D1 2.00000000 sec  
D11 0.03000000 sec  
TDO 1

===== CHANNEL f1 =====  
SFO1 100.6379178 MHz  
NUC1 13C  
P1 10.00 usec  
PLW1 45.00000000 W

===== CHANNEL f2 =====  
SFO2 400.1916008 MHz  
NUC2 1H  
CPDPRG[2] waltz16

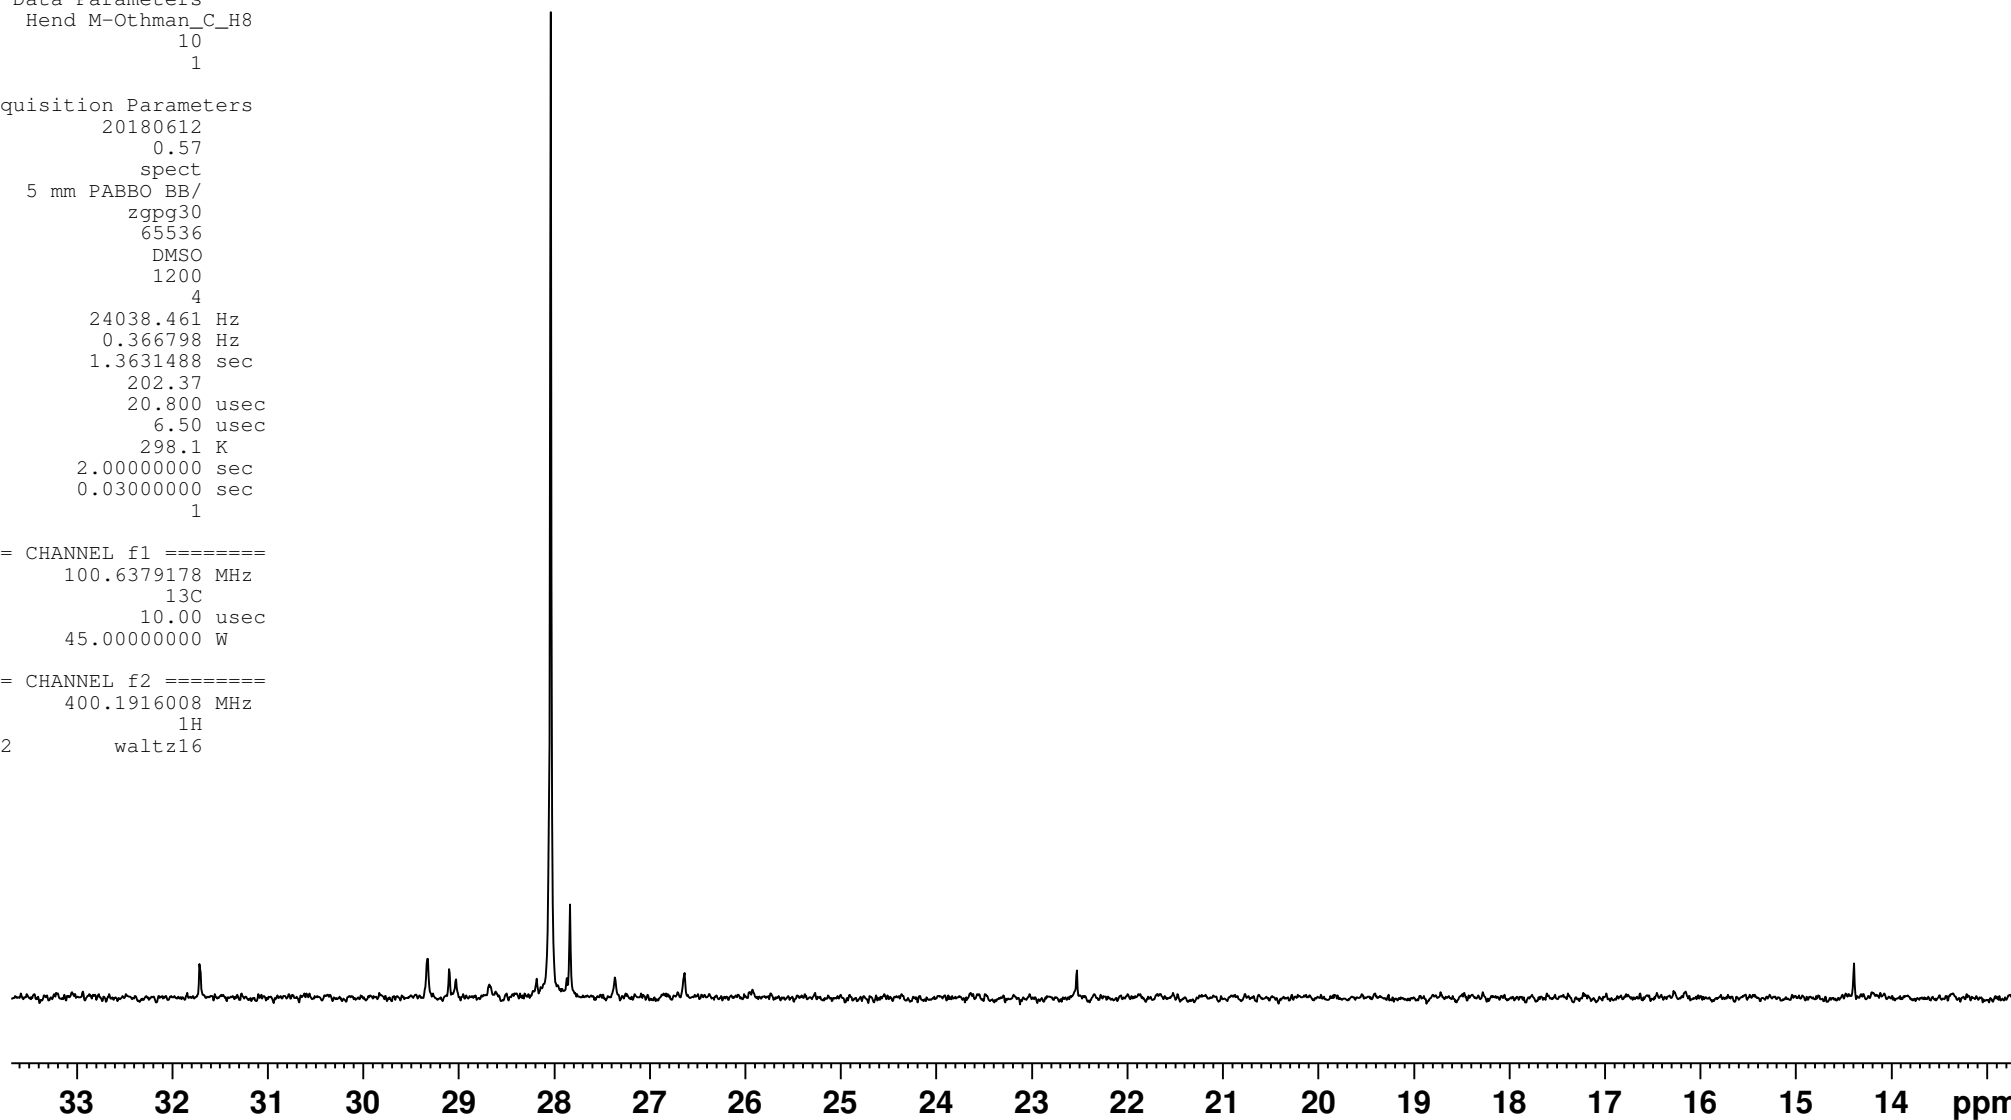

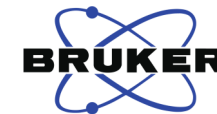

— 31.71

— 29.33

— 29.10

— 29.03

— 28.68

— 28.19

— 28.04

— 27.84

— 27.37

— 26.64

— 22.53

— 14.39

Current Data Parameters  
NAME Hend M-Othman\_C\_H8  
EXPNO 10  
PROCNO 1

F2 - Acquisition Parameters  
Date\_ 20180612  
Time 0.57  
INSTRUM spect  
PROBHD 5 mm PABBO BB/  
PULPROG zgpg30  
TD 65536  
SOLVENT DMSO  
NS 1200  
DS 4  
SWH 24038.461 Hz  
FIDRES 0.366798 Hz  
AQ 1.3631488 sec  
RG 202.37  
DW 20.800 usec  
DE 6.50 usec  
TE 298.1 K  
D1 2.00000000 sec  
D11 0.03000000 sec  
TDO 1

===== CHANNEL f1 =====  
SFO1 100.6379178 MHz  
NUC1 13C  
P1 10.00 usec  
PLW1 45.00000000 W

===== CHANNEL f2 =====  
SFO2 400.1916008 MHz  
NUC2 1H  
CPDPRG[2] waltz16

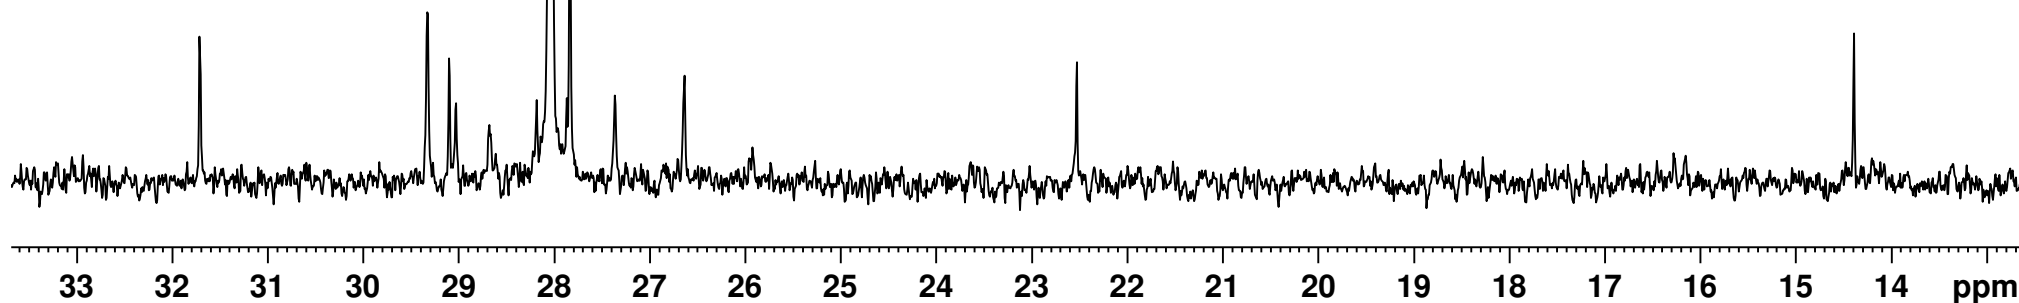

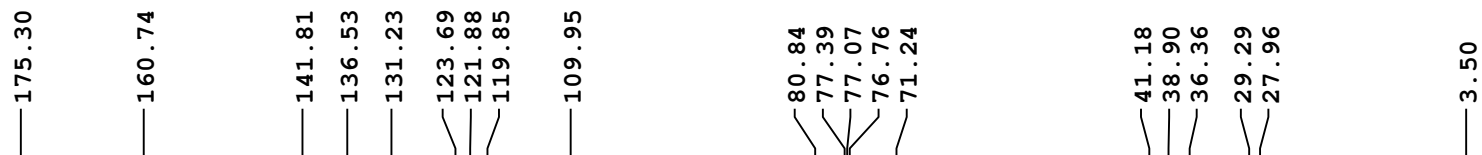

Current Data Parameters  
NAME Hend M-Othman\_C\_H9  
EXPNO 10  
PROCNO 1

F2 - Acquisition Parameters  
Date\_ 20180611  
Time 18.40  
INSTRUM spect  
PROBHD 5 mm PABBO BB/  
PULPROG zgpg30  
TD 65536  
SOLVENT CDCl3  
NS 1200  
DS 4  
SWH 24038.461 Hz  
FIDRES 0.366798 Hz  
AQ 1.3631488 sec  
RG 202.37  
DW 20.800 usec  
DE 6.50 usec  
TE 298.1 K  
D1 2.00000000 sec  
D11 0.03000000 sec  
TD0 1

===== CHANNEL f1 =====  
SFO1 100.6379178 MHz  
NUC1 13C  
P1 10.00 usec  
PLW1 45.00000000 W

===== CHANNEL f2 =====  
SFO2 400.1916008 MHz  
NUC2 1H  
CPDPRG[2] waltz16

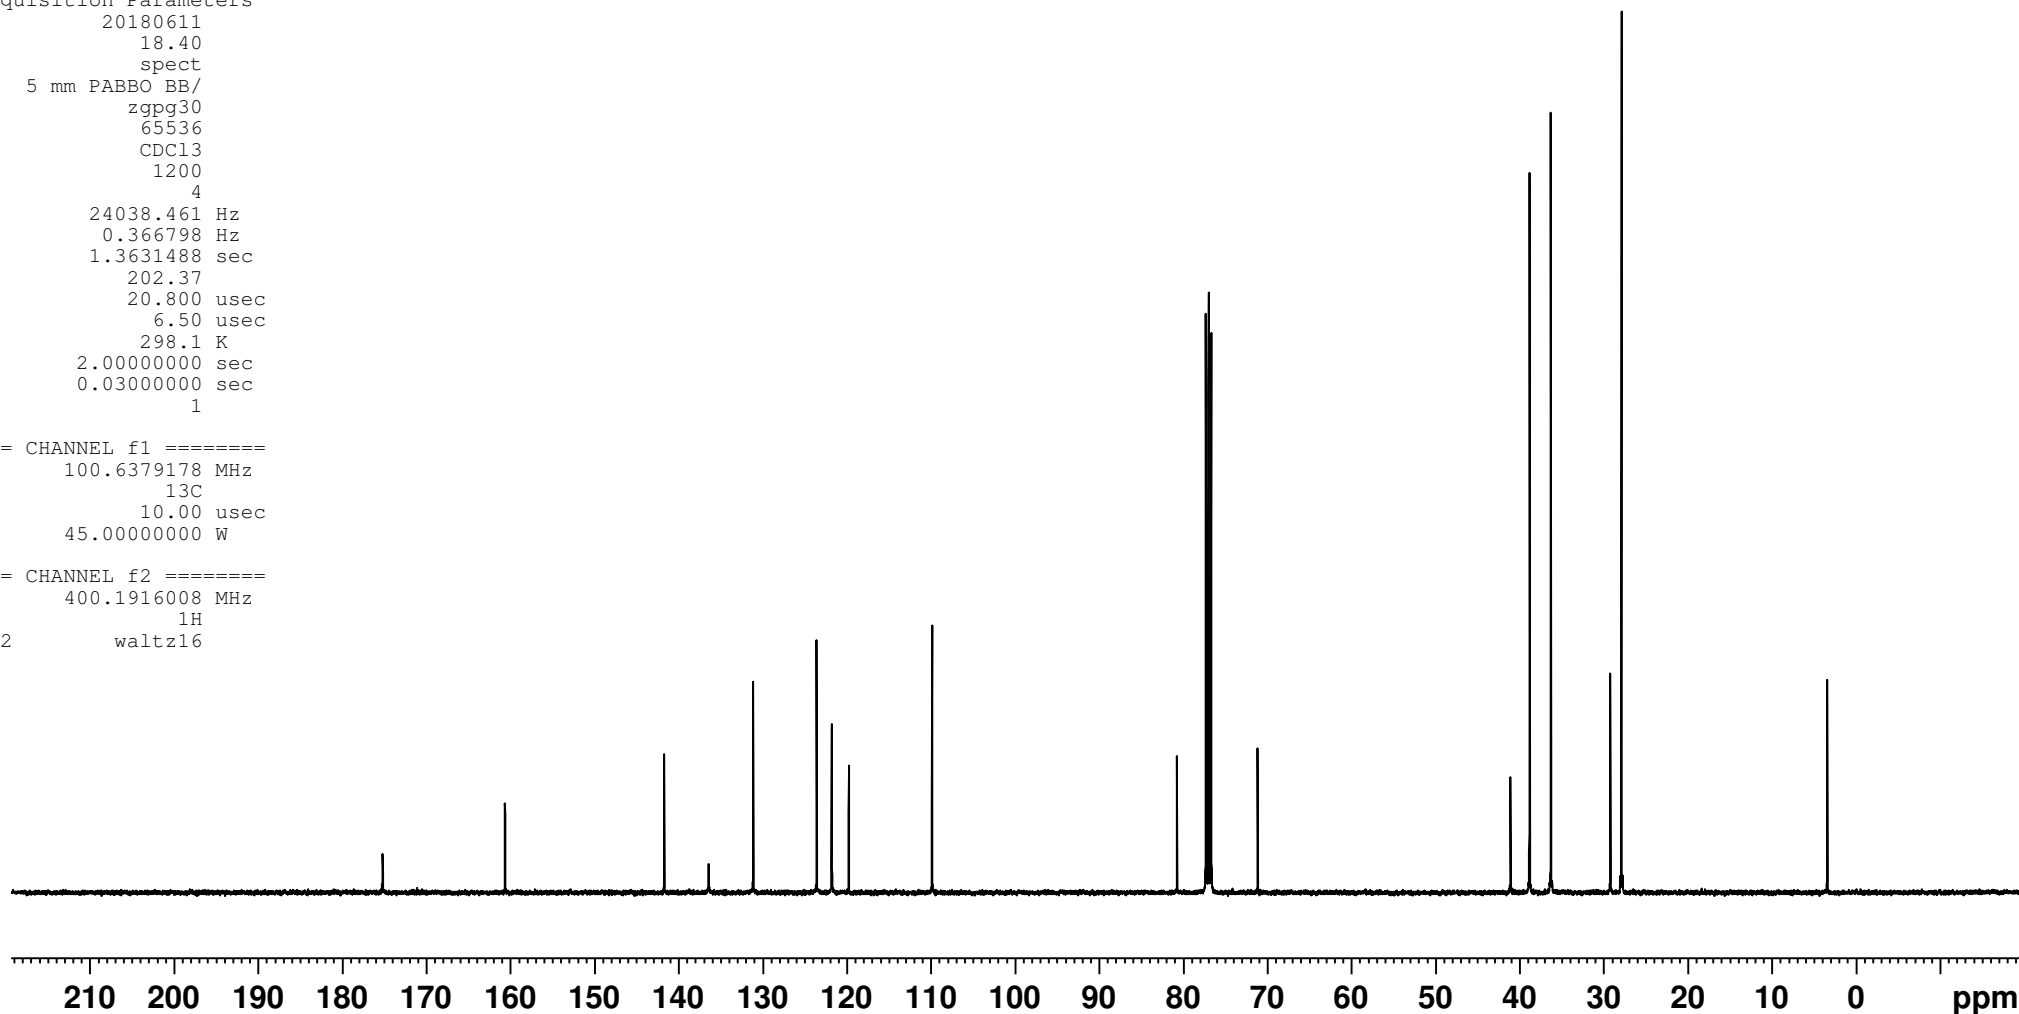

— 175.30

— 160.74

— 141.81

— 136.53

— 131.23

— 123.69

— 121.88

— 119.85

— 109.95

Current Data Parameters  
NAME Hend M-Othman\_C\_H9  
EXPNO 10  
PROCNO 1

F2 - Acquisition Parameters  
Date\_ 20180611  
Time 18.40  
INSTRUM spect  
PROBHD 5 mm PABBO BB/  
PULPROG zgpg30  
TD 65536  
SOLVENT CDCl3  
NS 1200  
DS 4  
SWH 24038.461 Hz  
FIDRES 0.366798 Hz  
AQ 1.3631488 sec  
RG 202.37  
DW 20.800 usec  
DE 6.50 usec  
TE 298.1 K  
D1 2.00000000 sec  
D11 0.03000000 sec  
TD0 1

===== CHANNEL f1 =====  
SFO1 100.6379178 MHz  
NUC1 13C  
P1 10.00 usec  
PLW1 45.00000000 W

===== CHANNEL f2 =====  
SFO2 400.1916008 MHz  
NUC2 1H  
CPDPRG[2] waltz16

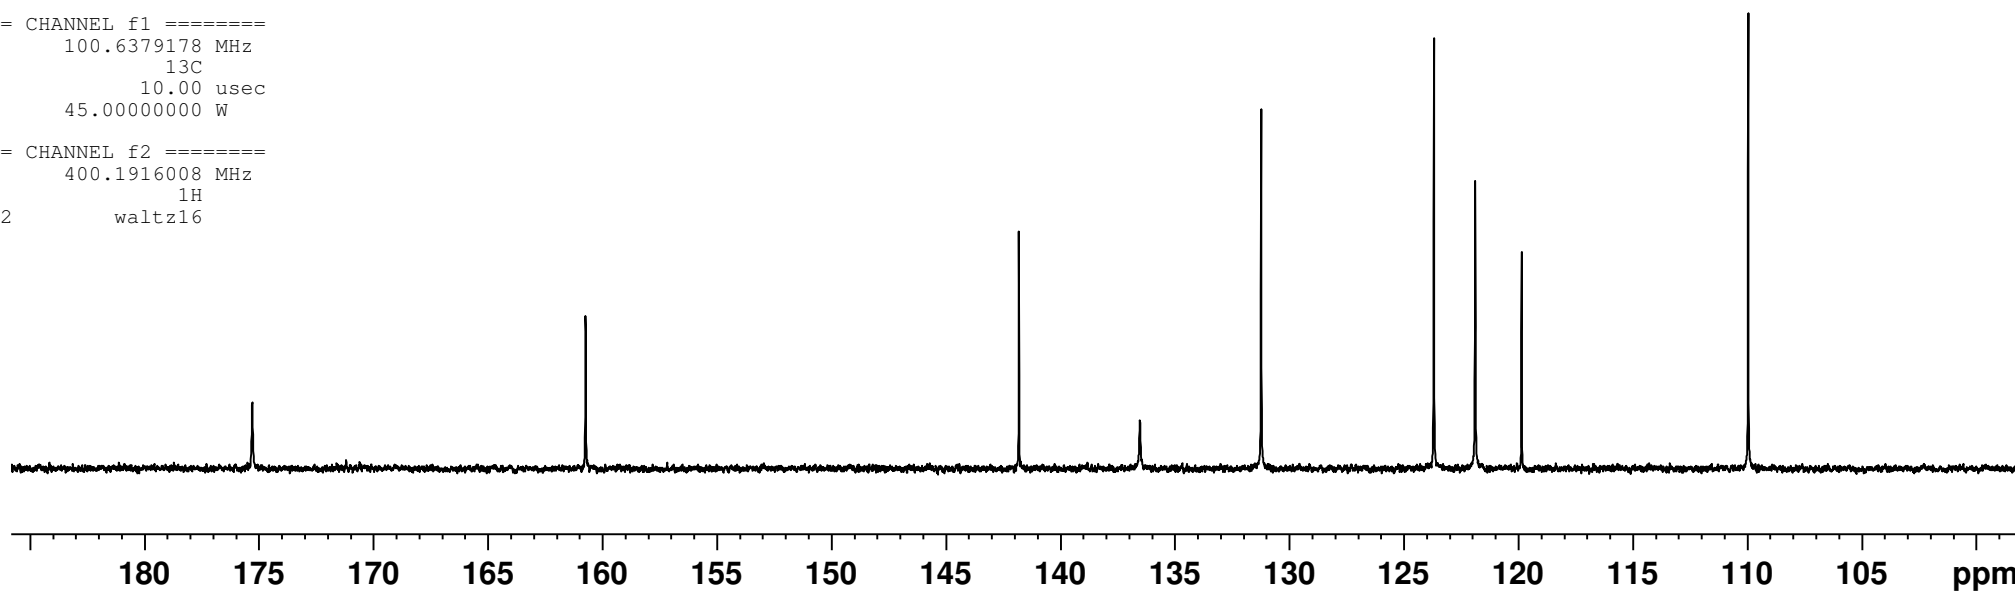

— 80.84  
— 77.39  
— 77.07  
— 76.76  
— 71.24

— 41.18  
— 38.90  
— 36.36  
— 29.29  
— 27.96

— 3.50

Current Data Parameters  
NAME Hend M-Othman\_C\_H9  
EXPNO 10  
PROCNO 1

F2 - Acquisition Parameters  
Date\_ 20180611  
Time 18.40  
INSTRUM spect  
PROBHD 5 mm PABBO BB/  
PULPROG zgpg30  
TD 65536  
SOLVENT CDCl3  
NS 1200  
DS 4  
SWH 24038.461 Hz  
FIDRES 0.366798 Hz  
AQ 1.3631488 sec  
RG 202.37  
DW 20.800 usec  
DE 6.50 usec  
TE 298.1 K  
D1 2.00000000 sec  
D11 0.03000000 sec  
TD0 1

===== CHANNEL f1 =====  
SFO1 100.6379178 MHz  
NUC1 13C  
P1 10.00 usec  
PLW1 45.00000000 W

===== CHANNEL f2 =====  
SFO2 400.1916008 MHz  
NUC2 1H  
CPDPRG[2] waltz16

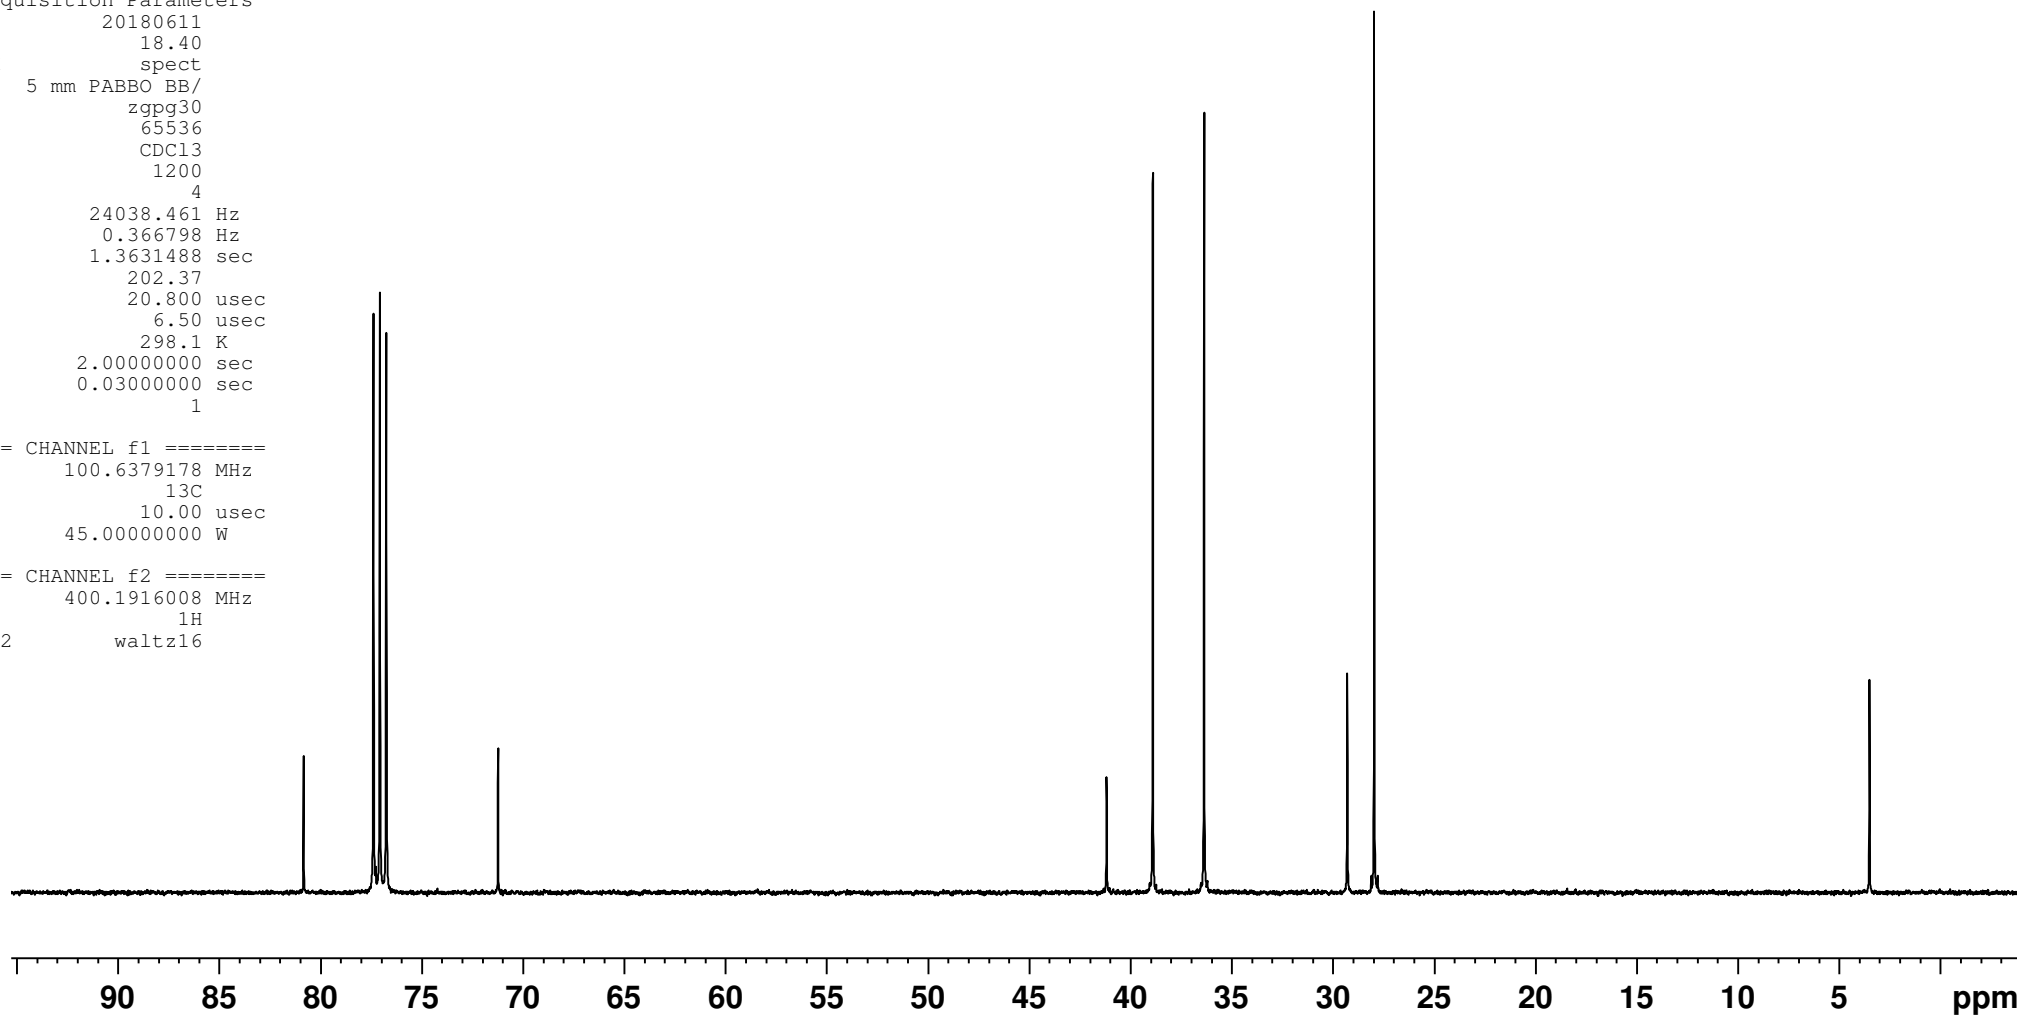

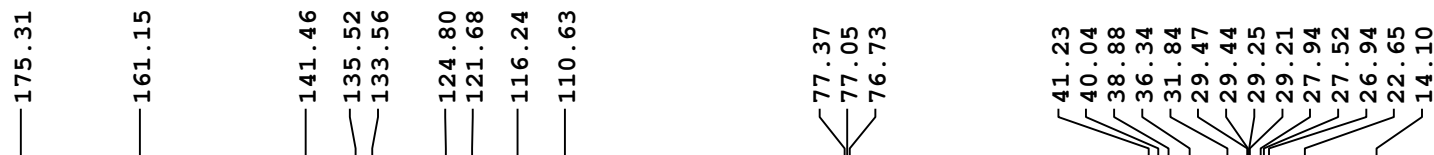

Current Data Parameters  
NAME Hend M-Othman\_C\_H10  
EXPNO 10  
PROCNO 1

F2 - Acquisition Parameters  
Date\_ 20180611  
Time 19.55  
INSTRUM spect  
PROBHD 5 mm PABBO BB/  
PULPROG zgpg30  
TD 65536  
SOLVENT CDCl3  
NS 1200  
DS 4  
SWH 24038.461 Hz  
FIDRES 0.366798 Hz  
AQ 1.3631488 sec  
RG 202.37  
DW 20.800 usec  
DE 6.50 usec  
TE 298.0 K  
D1 2.00000000 sec  
D11 0.03000000 sec  
TD0 1

==== CHANNEL f1 =====  
SFO1 100.6379178 MHz  
NUC1 13C  
P1 10.00 usec  
PLW1 45.00000000 W

==== CHANNEL f2 =====  
SFO2 400.1916008 MHz  
NUC2 1H  
CPDPRG[2] waltz16

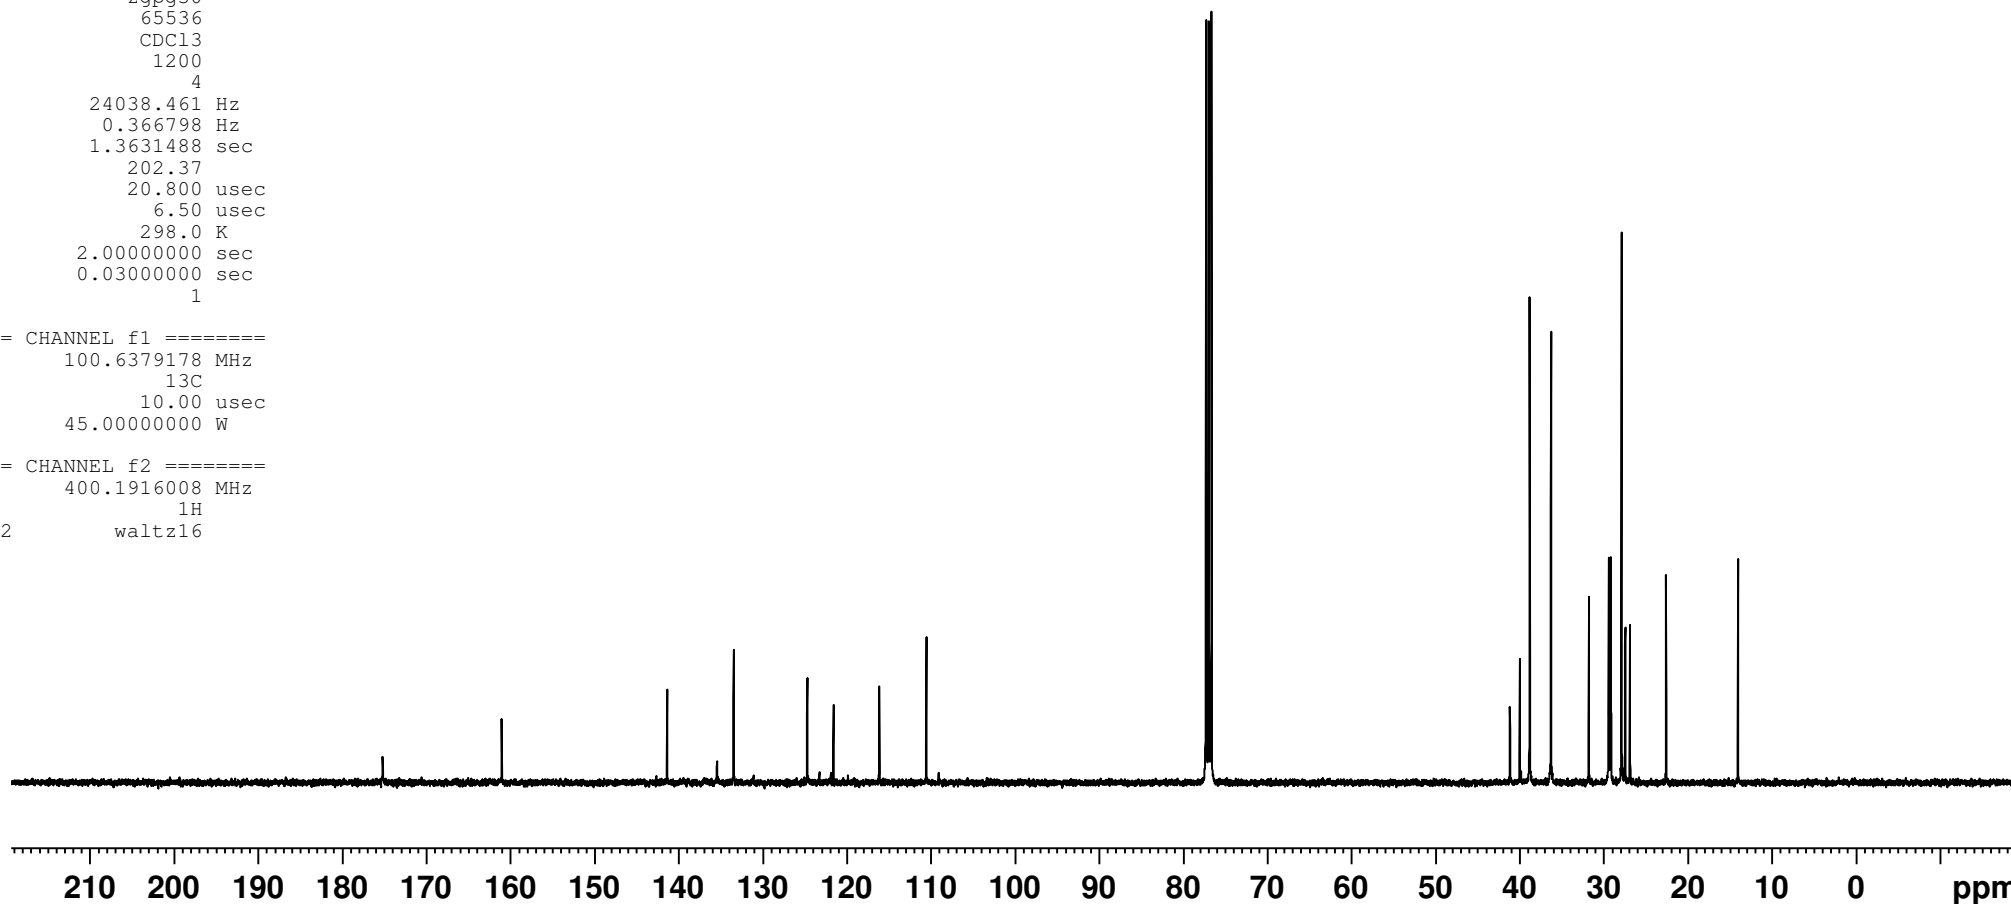

—175.31      —161.15      —141.46      —135.52      —133.56      —124.80      —121.68      —116.24      —110.63

77.37  
77.05  
76.73

41.23      40.04      38.88      36.34      31.84      29.47      29.44      29.25      29.21      27.94      27.52      26.94      22.65      14.10

Current Data Parameters  
NAME Hend M-Othman\_C\_H10  
EXPNO 10  
PROCNO 1

F2 - Acquisition Parameters  
Date\_ 20180611  
Time 19.55  
INSTRUM spect  
PROBHD 5 mm PABBO BB/  
PULPROG zgpg30  
TD 65536  
SOLVENT CDC13  
NS 1200  
DS 4  
SWH 24038.461 Hz  
FIDRES 0.366798 Hz  
AQ 1.3631488 sec  
RG 202.37  
DW 20.800 usec  
DE 6.50 usec  
TE 298.0 K  
D1 2.00000000 sec  
D11 0.03000000 sec  
TD0 1

===== CHANNEL f1 =====  
SFO1 100.6379178 MHz  
NUC1 13C  
P1 10.00 usec  
PLW1 45.00000000 W

===== CHANNEL f2 =====  
SFO2 400.1916008 MHz  
NUC2 1H  
CPDPRG[2] waltz16

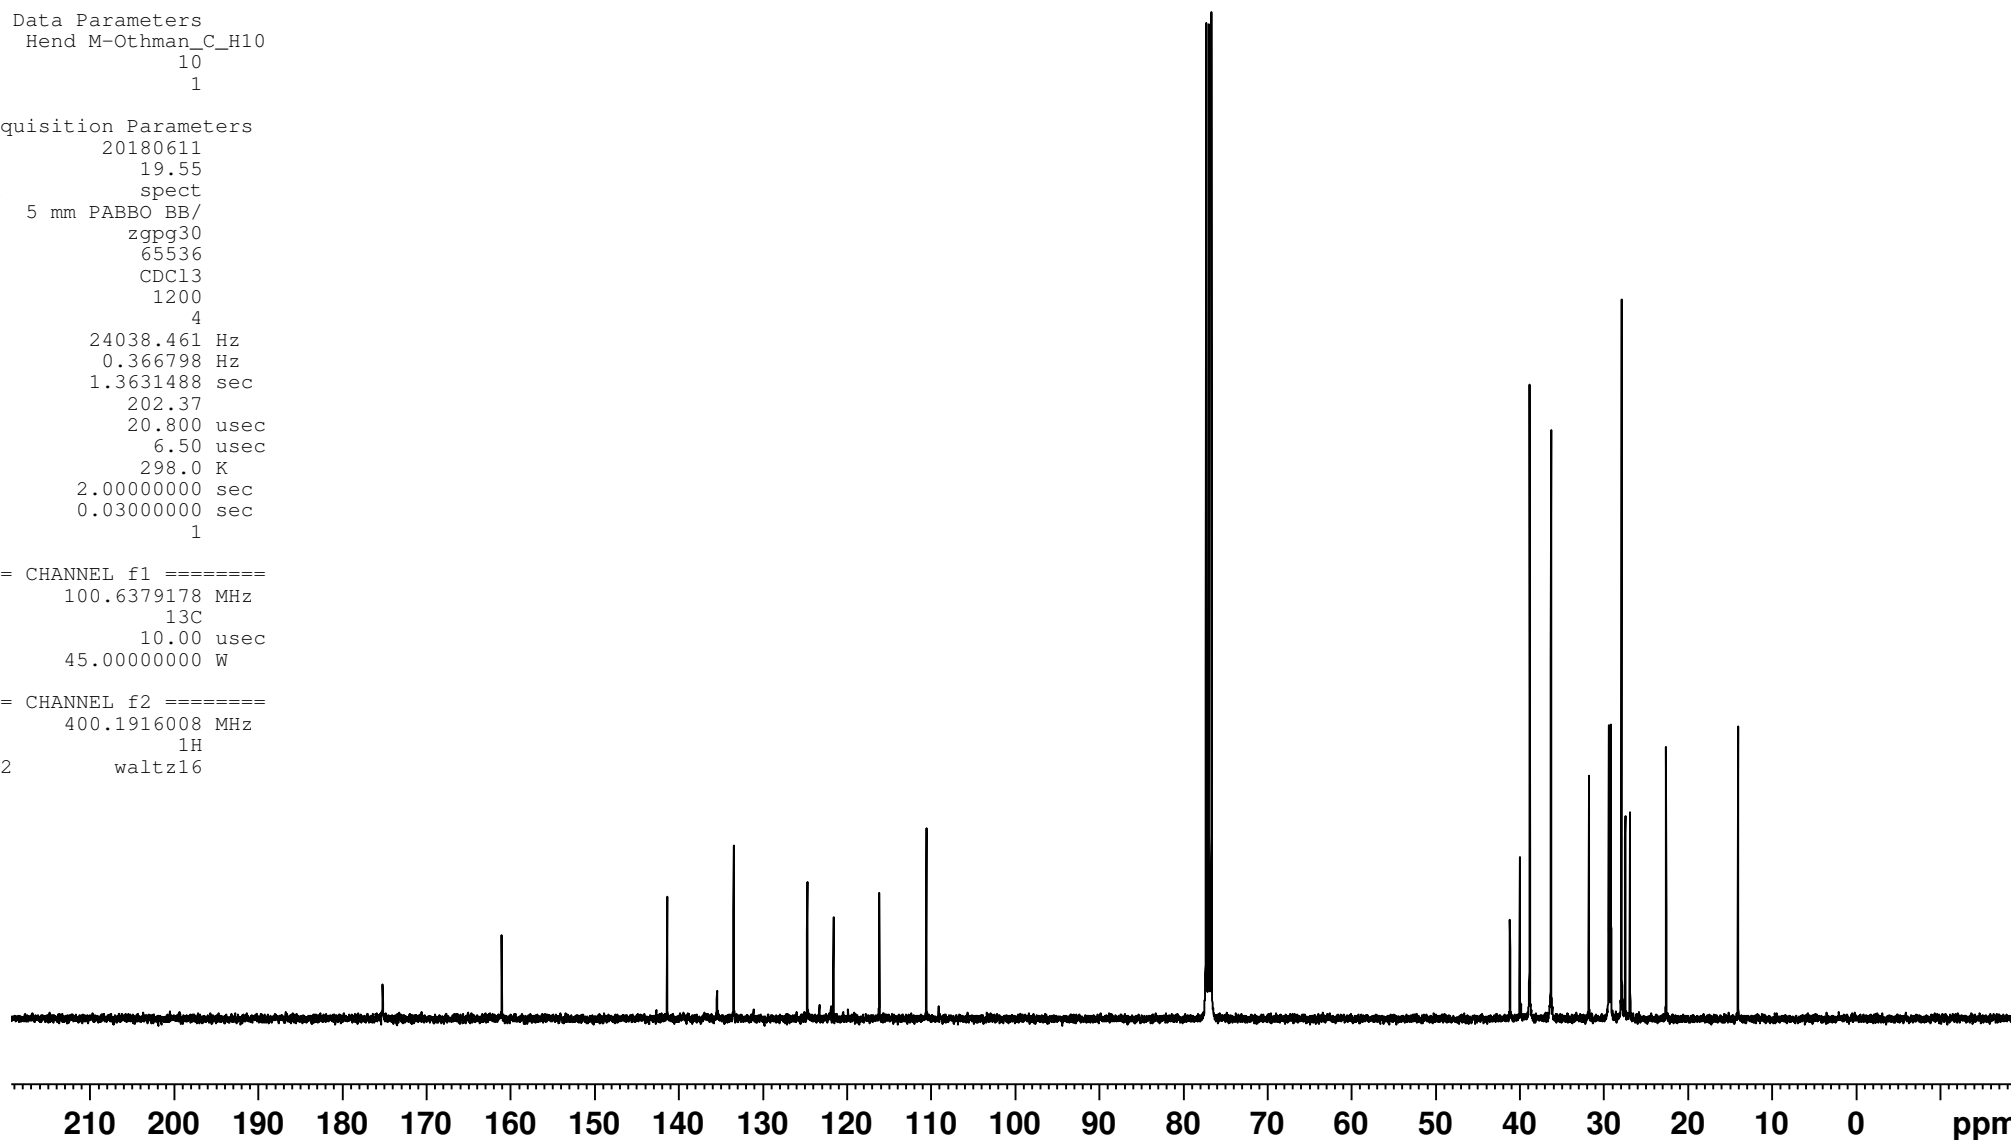



—175.31

—161.15

—141.46

—135.52

—133.56

—124.80

—121.68

—116.24

—110.63

Current Data Parameters  
NAME Hend M-Othman\_C\_H10  
EXPNO 10  
PROCNO 1

F2 - Acquisition Parameters  
Date\_ 20180611  
Time 19.55  
INSTRUM spect  
PROBHD 5 mm PABBO BB/  
PULPROG zgpg30  
TD 65536  
SOLVENT CDCl3  
NS 1200  
DS 4  
SWH 24038.461 Hz  
FIDRES 0.366798 Hz  
AQ 1.3631488 sec  
RG 202.37  
DW 20.800 usec  
DE 6.50 usec  
TE 298.0 K  
D1 2.00000000 sec  
D11 0.03000000 sec  
TD0 1

===== CHANNEL f1 =====  
SFO1 100.6379178 MHz  
NUC1 13C  
P1 10.00 usec  
PLW1 45.00000000 W

===== CHANNEL f2 =====  
SFO2 400.1916008 MHz  
NUC2 1H  
CPDPRG[2] waltz16

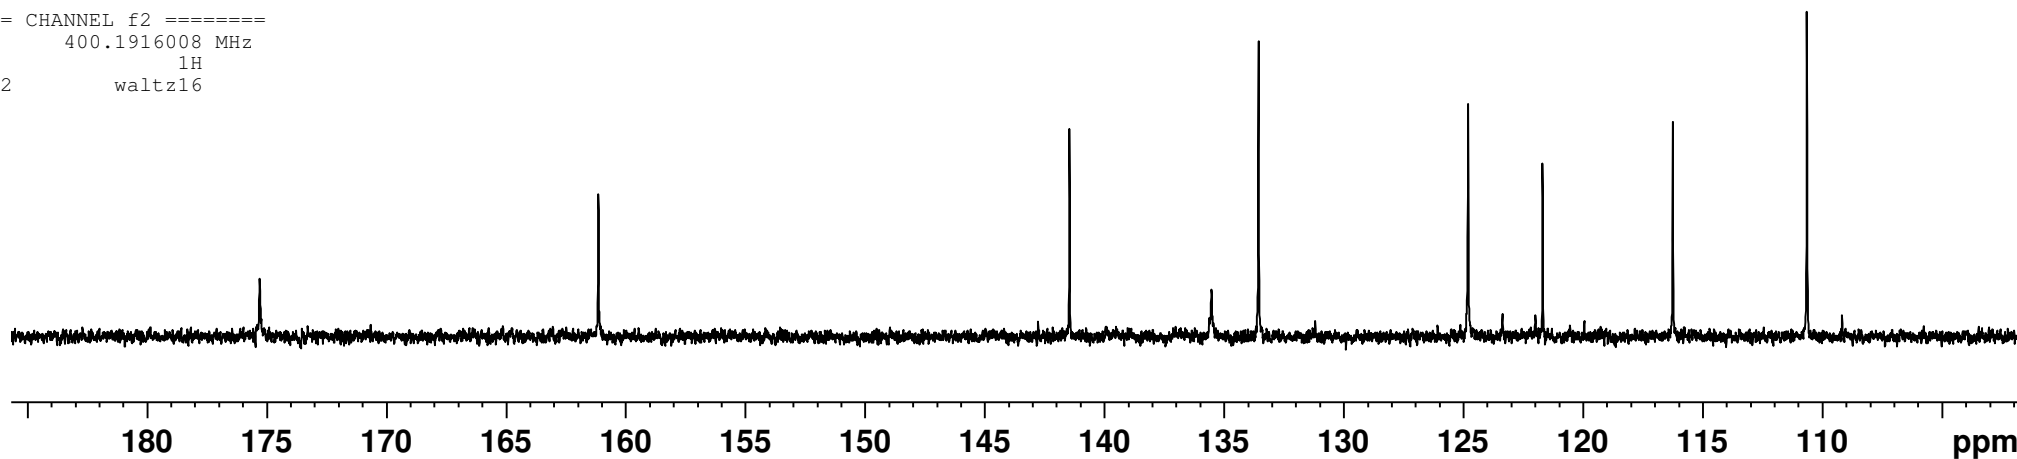

—41.23 —40.04 —38.88 —36.34 —31.84 —29.47 —29.44 —29.25 —29.21 —27.94 —27.52 —26.94 —22.65 —14.10

Current Data Parameters  
NAME Hend M-Othman\_C\_H10  
EXPNO 10  
PROCNO 1

F2 - Acquisition Parameters  
Date\_ 20180611  
Time 19.55  
INSTRUM spect  
PROBHD 5 mm PABBO BB/  
PULPROG zgpg30  
TD 65536  
SOLVENT CDCl3  
NS 1200  
DS 4  
SWH 24038.461 Hz  
FIDRES 0.366798 Hz  
AQ 1.3631488 sec  
RG 202.37  
DW 20.800 usec  
DE 6.50 usec  
TE 298.0 K  
D1 2.00000000 sec  
D11 0.03000000 sec  
TDO 1

===== CHANNEL f1 =====  
SFO1 100.6379178 MHz  
NUC1 13C  
P1 10.00 usec  
PLW1 45.00000000 W

===== CHANNEL f2 =====  
SFO2 400.1916008 MHz  
NUC2 1H  
CPDPRG[2] waltz16

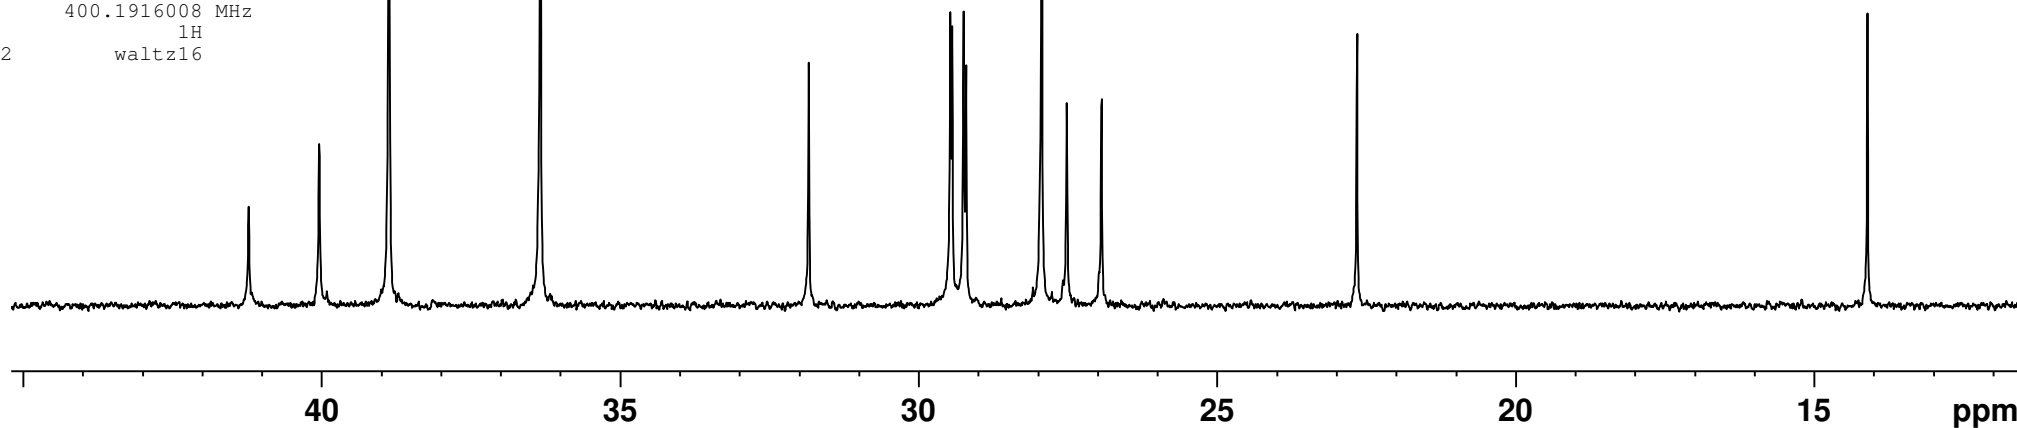

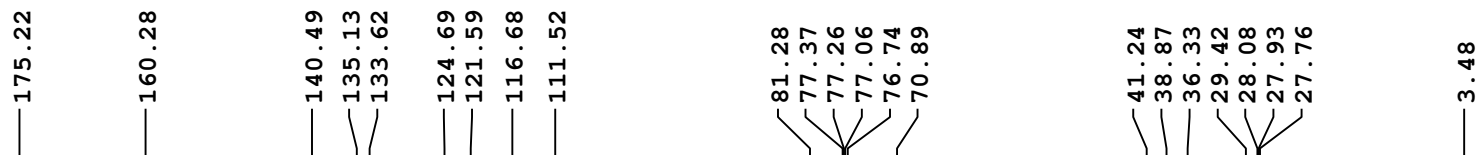

Current Data Parameters  
NAME Hend M-Othman\_C\_H11  
EXPNO 10  
PROCNO 1

F2 - Acquisition Parameters  
Date\_ 20180611  
Time 21.11  
INSTRUM spect  
PROBHD 5 mm PABBO BB/  
PULPROG zgpg30  
TD 65536  
SOLVENT CDCl3  
NS 1200  
DS 4  
SWH 24038.461 Hz  
FIDRES 0.366798 Hz  
AQ 1.3631488 sec  
RG 202.37  
DW 20.800 usec  
DE 6.50 usec  
TE 298.1 K  
D1 2.00000000 sec  
D11 0.03000000 sec  
TD0 1

===== CHANNEL f1 =====  
SFO1 100.6379178 MHz  
NUC1 13C  
P1 10.00 usec  
PLW1 45.00000000 W

===== CHANNEL f2 =====  
SFO2 400.1916008 MHz  
NUC2 1H  
CPDPRG[2] waltz16

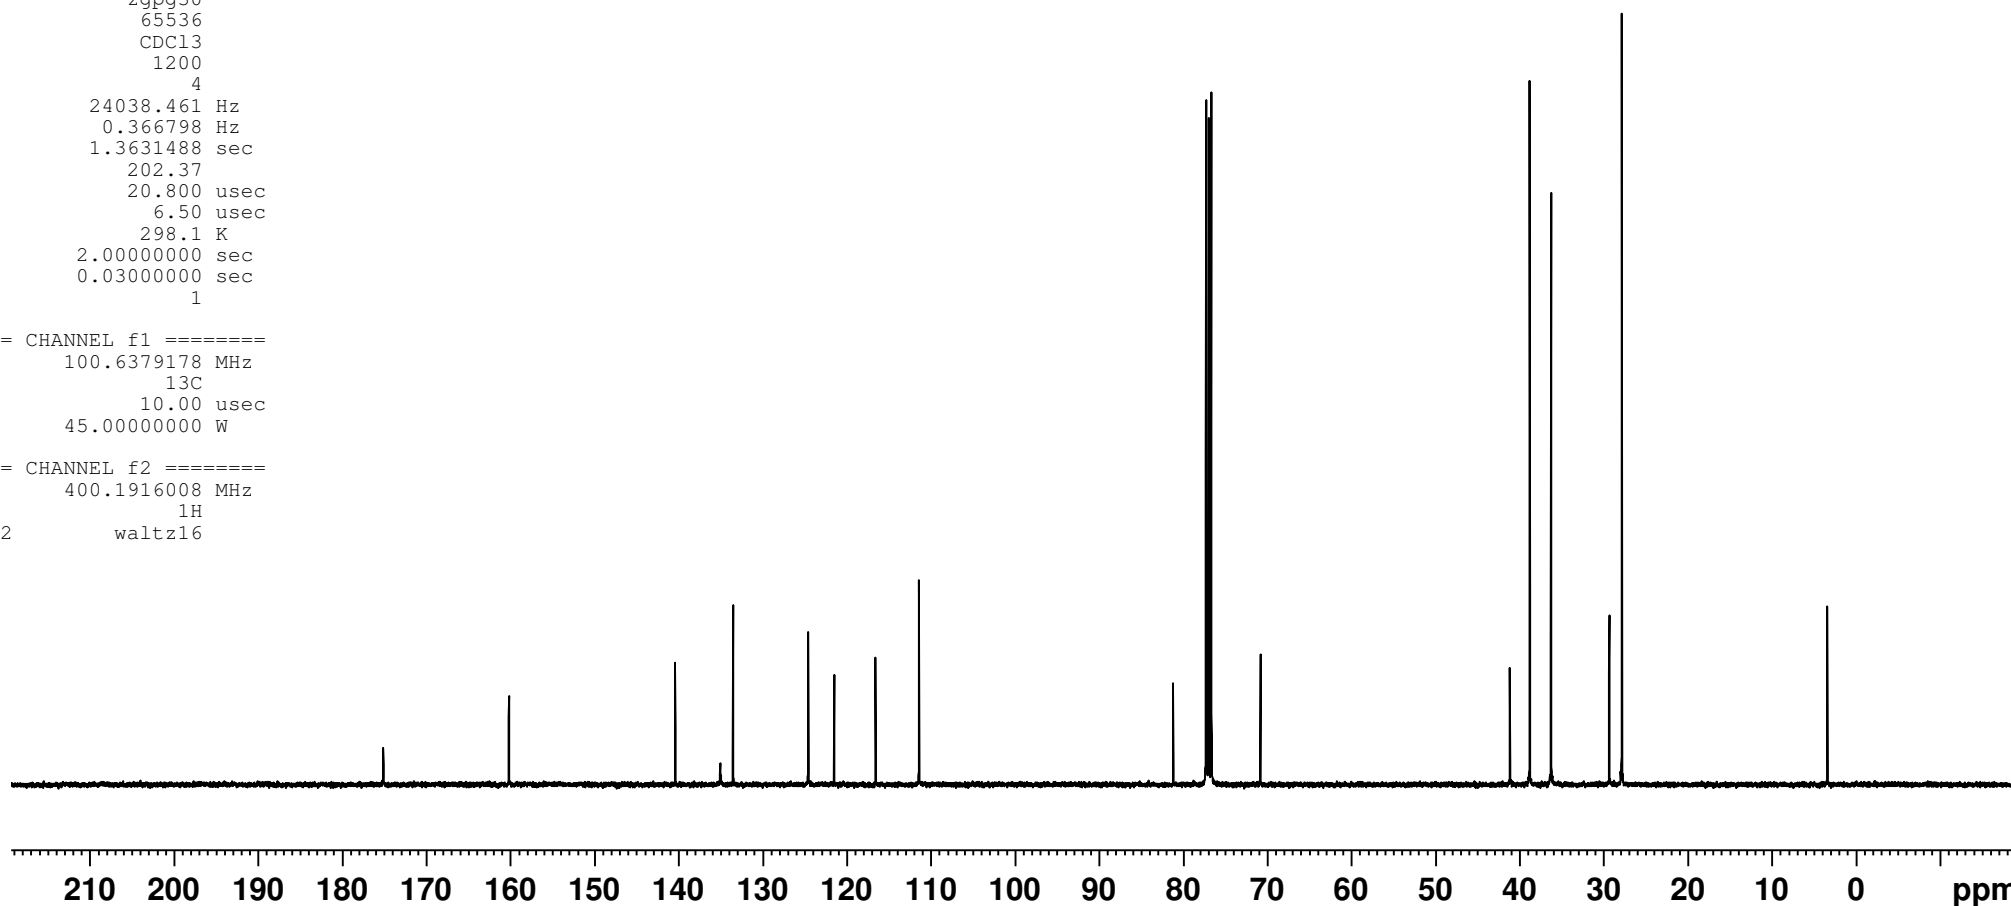



— 175.22

— 160.28

— 140.49

— 135.13

— 133.62

— 124.69

— 121.59

— 116.68

— 111.52

Current Data Parameters  
NAME Hend M-Othman\_C\_H11  
EXPNO 10  
PROCNO 1

F2 - Acquisition Parameters  
Date\_ 20180611  
Time 21.11  
INSTRUM spect  
PROBHD 5 mm PABBO BB/  
PULPROG zgpg30  
TD 65536  
SOLVENT CDCl3  
NS 1200  
DS 4  
SWH 24038.461 Hz  
FIDRES 0.366798 Hz  
AQ 1.3631488 sec  
RG 202.37  
DW 20.800 usec  
DE 6.50 usec  
TE 298.1 K  
D1 2.00000000 sec  
D11 0.03000000 sec  
TD0 1

===== CHANNEL f1 =====  
SFO1 100.6379178 MHz  
NUC1 13C  
P1 10.00 usec  
PLW1 45.00000000 W

===== CHANNEL f2 =====  
SFO2 400.1916008 MHz  
NUC2 1H  
CPDPRG[2] waltz16

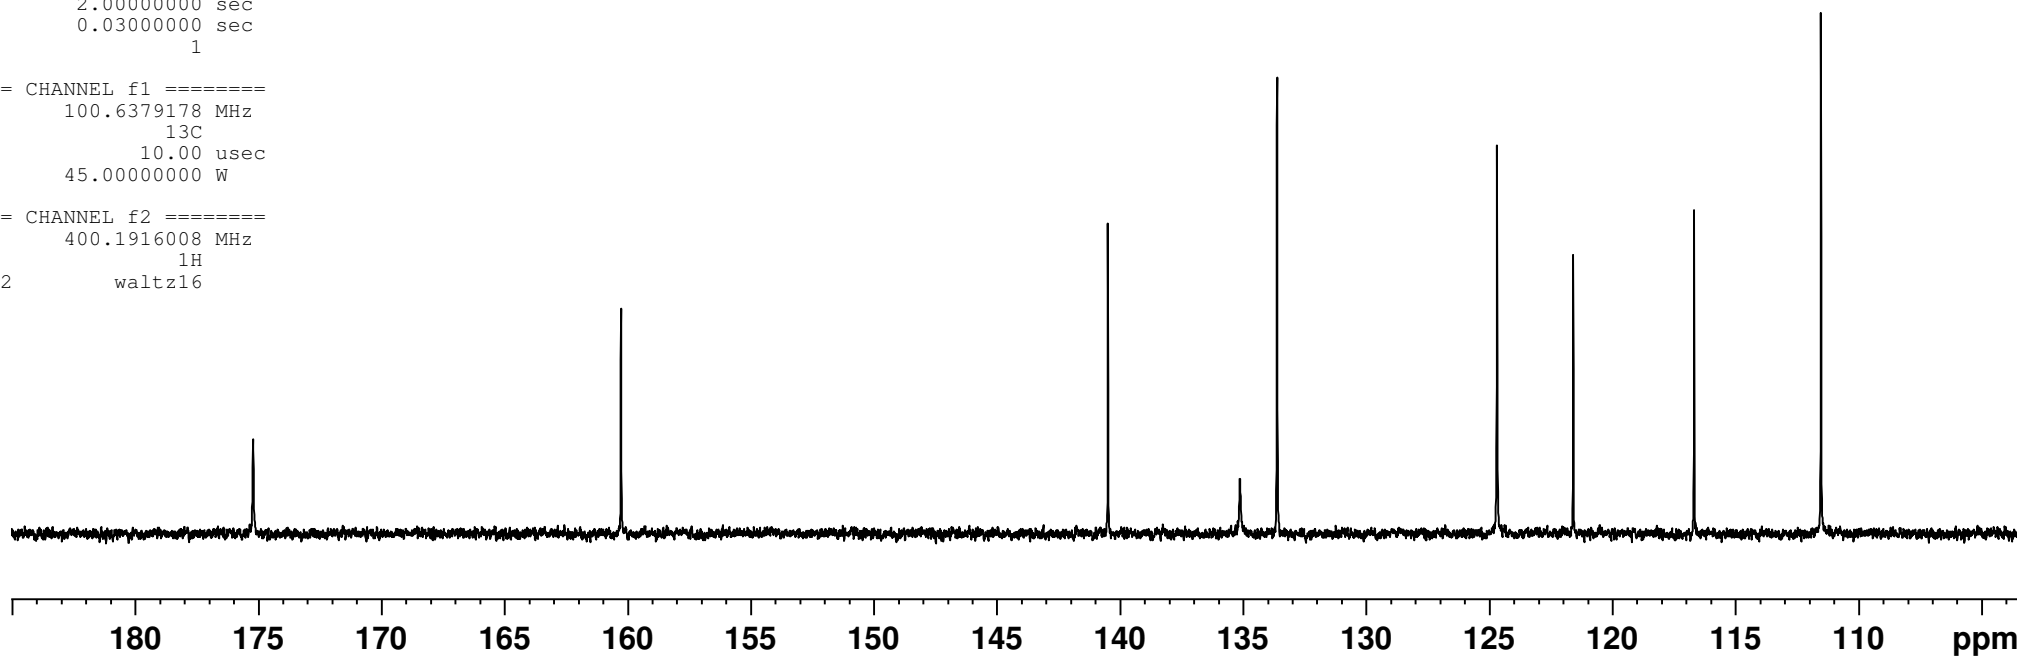

— 81.28  
77.37  
77.26  
77.06  
76.74  
— 70.89

— 41.24  
— 38.87  
— 36.33  
29.42  
28.08  
27.93  
27.76

— 3.48

Current Data Parameters  
NAME Hend M-Othman\_C\_H11  
EXPNO 10  
PROCNO 1

F2 - Acquisition Parameters  
Date\_ 20180611  
Time 21.11  
INSTRUM spect  
PROBHD 5 mm PABBO BB/  
PULPROG zgpg30  
TD 65536  
SOLVENT CDCl3  
NS 1200  
DS 4  
SWH 24038.461 Hz  
FIDRES 0.366798 Hz  
AQ 1.3631488 sec  
RG 202.37  
DW 20.800 usec  
DE 6.50 usec  
TE 298.1 K  
D1 2.00000000 sec  
D11 0.03000000 sec  
TDO 1

===== CHANNEL f1 =====  
SFO1 100.6379178 MHz  
NUC1 13C  
P1 10.00 usec  
PLW1 45.00000000 W

===== CHANNEL f2 =====  
SFO2 400.1916008 MHz  
NUC2 1H  
CPDPRG[2] waltz16

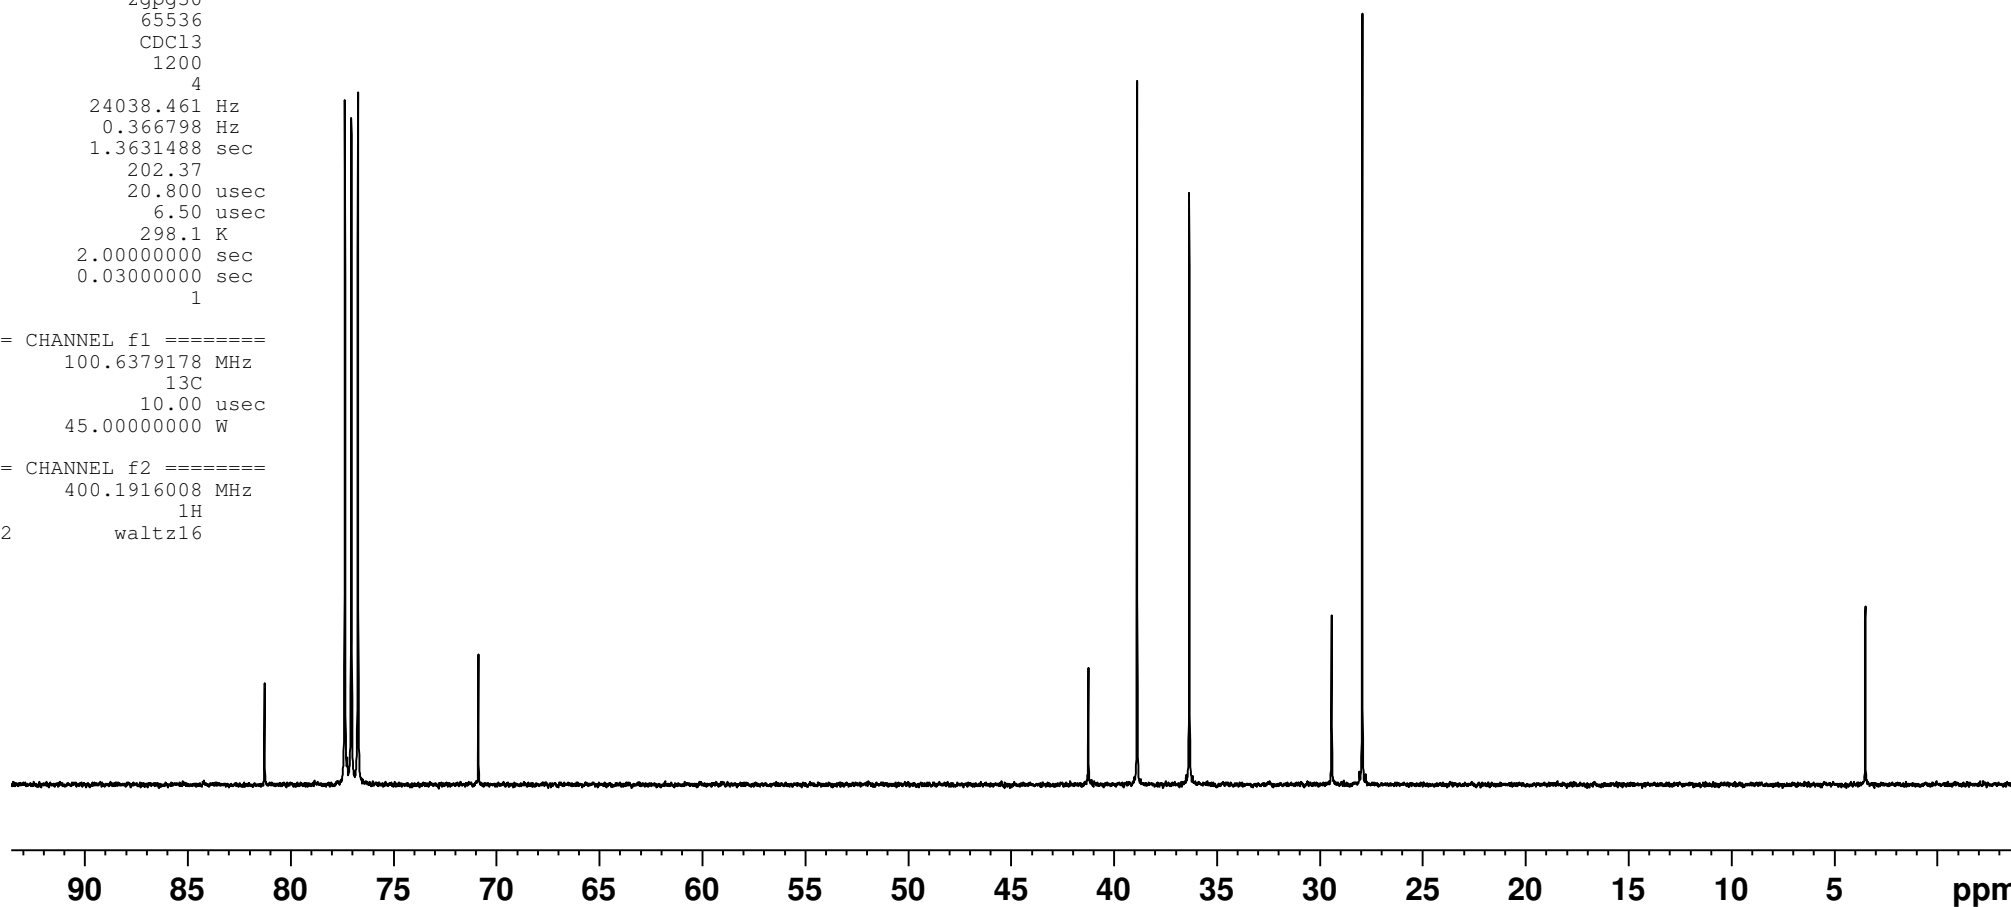

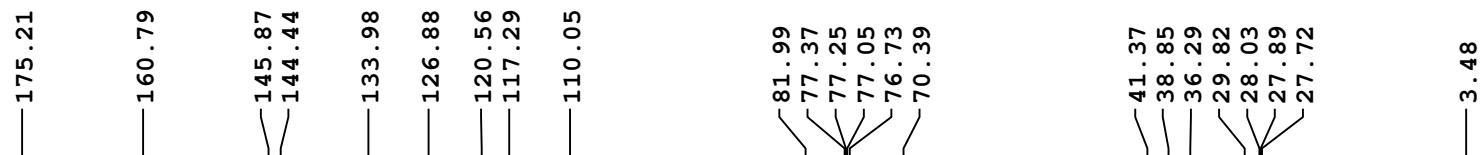

Current Data Parameters  
NAME Hend M-Othman\_C\_H12  
EXPNO 10  
PROCNO 1

F2 - Acquisition Parameters  
Date\_ 20180611  
Time 22.26  
INSTRUM spect  
PROBHD 5 mm PABBO BB/  
PULPROG zgpg30  
TD 65536  
SOLVENT CDCl3  
NS 1200  
DS 4  
SWH 24038.461 Hz  
FIDRES 0.366798 Hz  
AQ 1.3631488 sec  
RG 202.37  
DW 20.800 usec  
DE 6.50 usec  
TE 298.0 K  
D1 2.00000000 sec  
D11 0.03000000 sec  
TDO 1

===== CHANNEL f1 =====  
SFO1 100.6379178 MHz  
NUC1 13C  
P1 10.00 usec  
PLW1 45.00000000 W

===== CHANNEL f2 =====  
SFO2 400.1916008 MHz  
NUC2 1H  
CPDPRG[2] waltz16

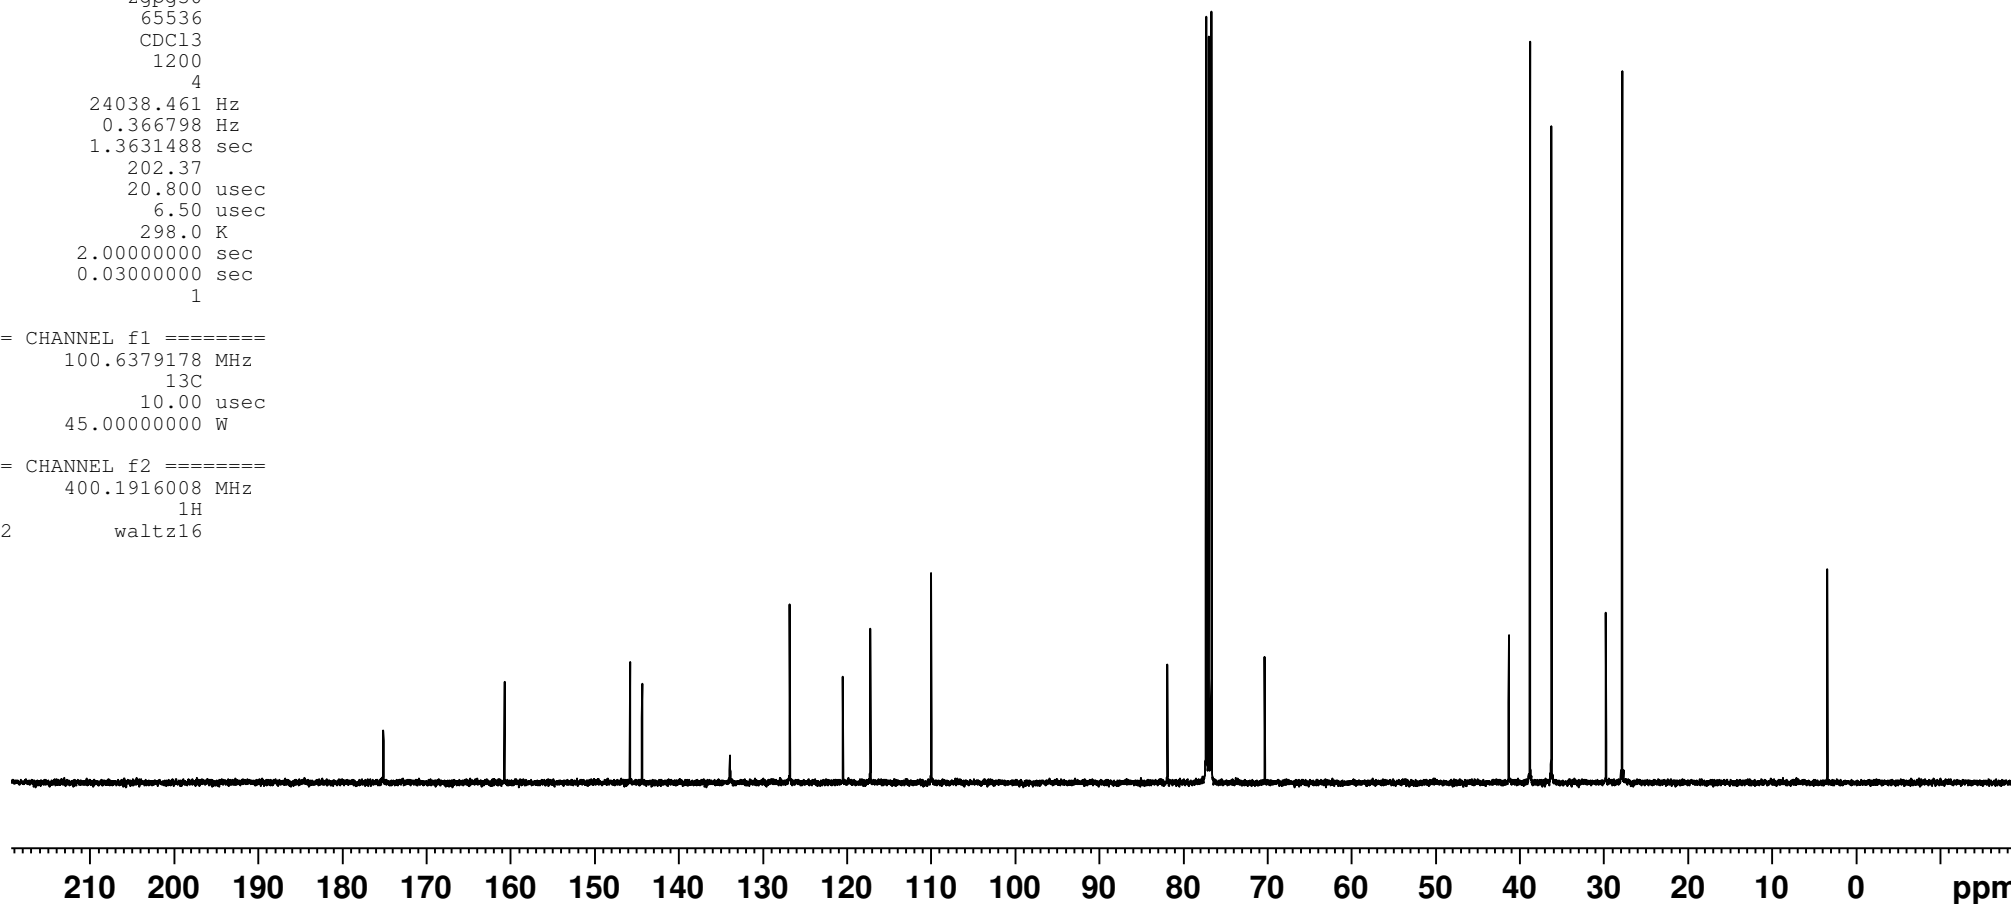



—175.21

—160.79

—145.87

—144.44

—133.98

—126.88

—120.56

—117.29

—110.05

Current Data Parameters  
NAME Hend M-Othman\_C\_H12  
EXPNO 10  
PROCNO 1

F2 - Acquisition Parameters  
Date\_ 20180611  
Time 22.26  
INSTRUM spect  
PROBHD 5 mm PABBO BB/  
PULPROG zgpg30  
TD 65536  
SOLVENT CDCl3  
NS 1200  
DS 4  
SWH 24038.461 Hz  
FIDRES 0.366798 Hz  
AQ 1.3631488 sec  
RG 202.37  
DW 20.800 usec  
DE 6.50 usec  
TE 298.0 K  
D1 2.00000000 sec  
D11 0.03000000 sec  
TD0 1

==== CHANNEL f1 =====  
SFO1 100.6379178 MHz  
NUC1 13C  
P1 10.00 usec  
PLW1 45.00000000 W

==== CHANNEL f2 =====  
SFO2 400.1916008 MHz  
NUC2 1H  
CPDPRG[2] waltz16

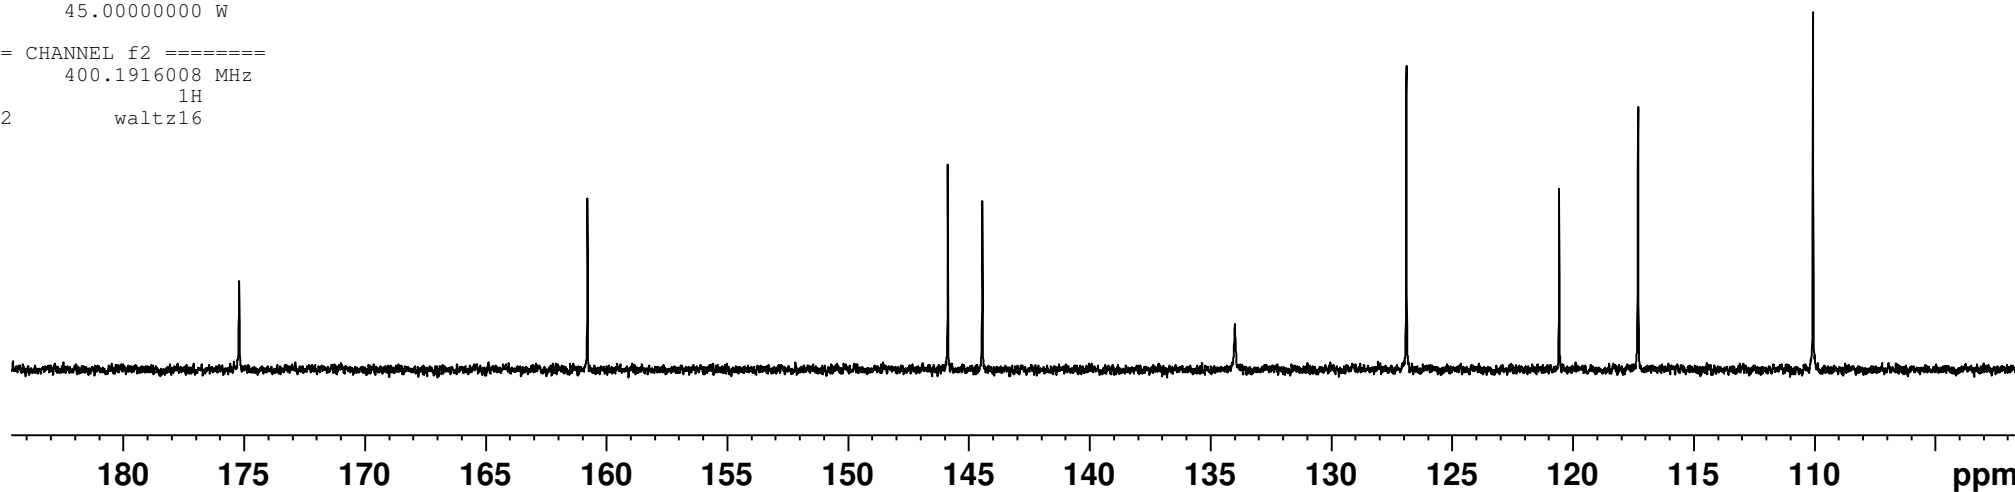

— 81.99  
77.37  
77.25  
77.05  
76.73  
— 70.39

— 41.37  
— 38.85  
— 36.29  
29.82  
28.03  
27.89  
27.72

— 3.48

Current Data Parameters  
NAME Hend M-Othman\_C\_H12  
EXPNO 10  
PROCNO 1

F2 - Acquisition Parameters  
Date\_ 20180611  
Time 22.26  
INSTRUM spect  
PROBHD 5 mm PABBO BB/  
PULPROG zgpg30  
TD 65536  
SOLVENT CDCl3  
NS 1200  
DS 4  
SWH 24038.461 Hz  
FIDRES 0.366798 Hz  
AQ 1.3631488 sec  
RG 202.37  
DW 20.800 usec  
DE 6.50 usec  
TE 298.0 K  
D1 2.00000000 sec  
D11 0.03000000 sec  
TD0 1

===== CHANNEL f1 =====  
SFO1 100.6379178 MHz  
NUC1 13C  
P1 10.00 usec  
PLW1 45.00000000 W

===== CHANNEL f2 =====  
SFO2 400.1916008 MHz  
NUC2 1H  
CPDPRG[2] waltz16

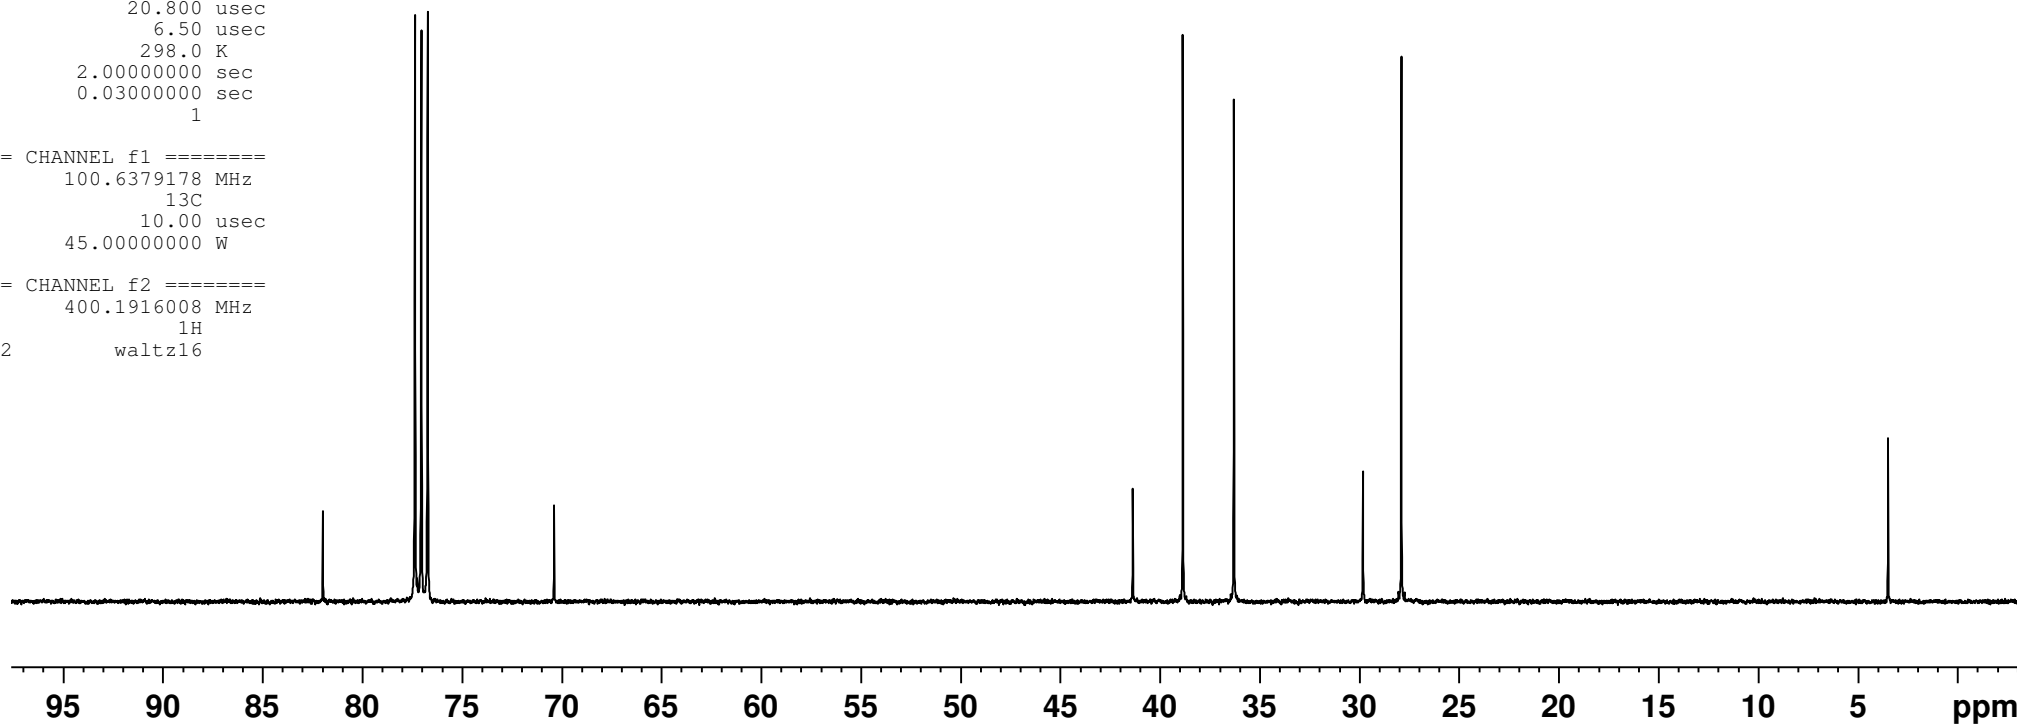

—175.29 —161.25  
141.16 135.21 134.38 133.60 129.10 128.22 127.19 124.76 121.69 116.57 111.38  
77.36 77.05 76.73  
43.56 41.28 38.90 36.35 27.95

Current Data Parameters  
NAME Hend M-Othman\_C\_H13  
EXPNO 10  
PROCNO 1

F2 - Acquisition Parameters  
Date\_ 20180611  
Time 23.43  
INSTRUM spect  
PROBHD 5 mm PABBO BB/  
PULPROG zgpg30  
TD 65536  
SOLVENT CDC13  
NS 1200  
DS 4  
SWH 24038.461 Hz  
FIDRES 0.366798 Hz  
AQ 1.3631488 sec  
RG 202.37  
DW 20.800 usec  
DE 6.50 usec  
TE 298.1 K  
D1 2.00000000 sec  
D11 0.03000000 sec  
TD0 1

===== CHANNEL f1 =====  
SFO1 100.6379178 MHz  
NUC1 13C  
P1 10.00 usec  
PLW1 45.00000000 W

===== CHANNEL f2 =====  
SFO2 400.1916008 MHz  
NUC2 1H  
CPDPRG[2] waltz16

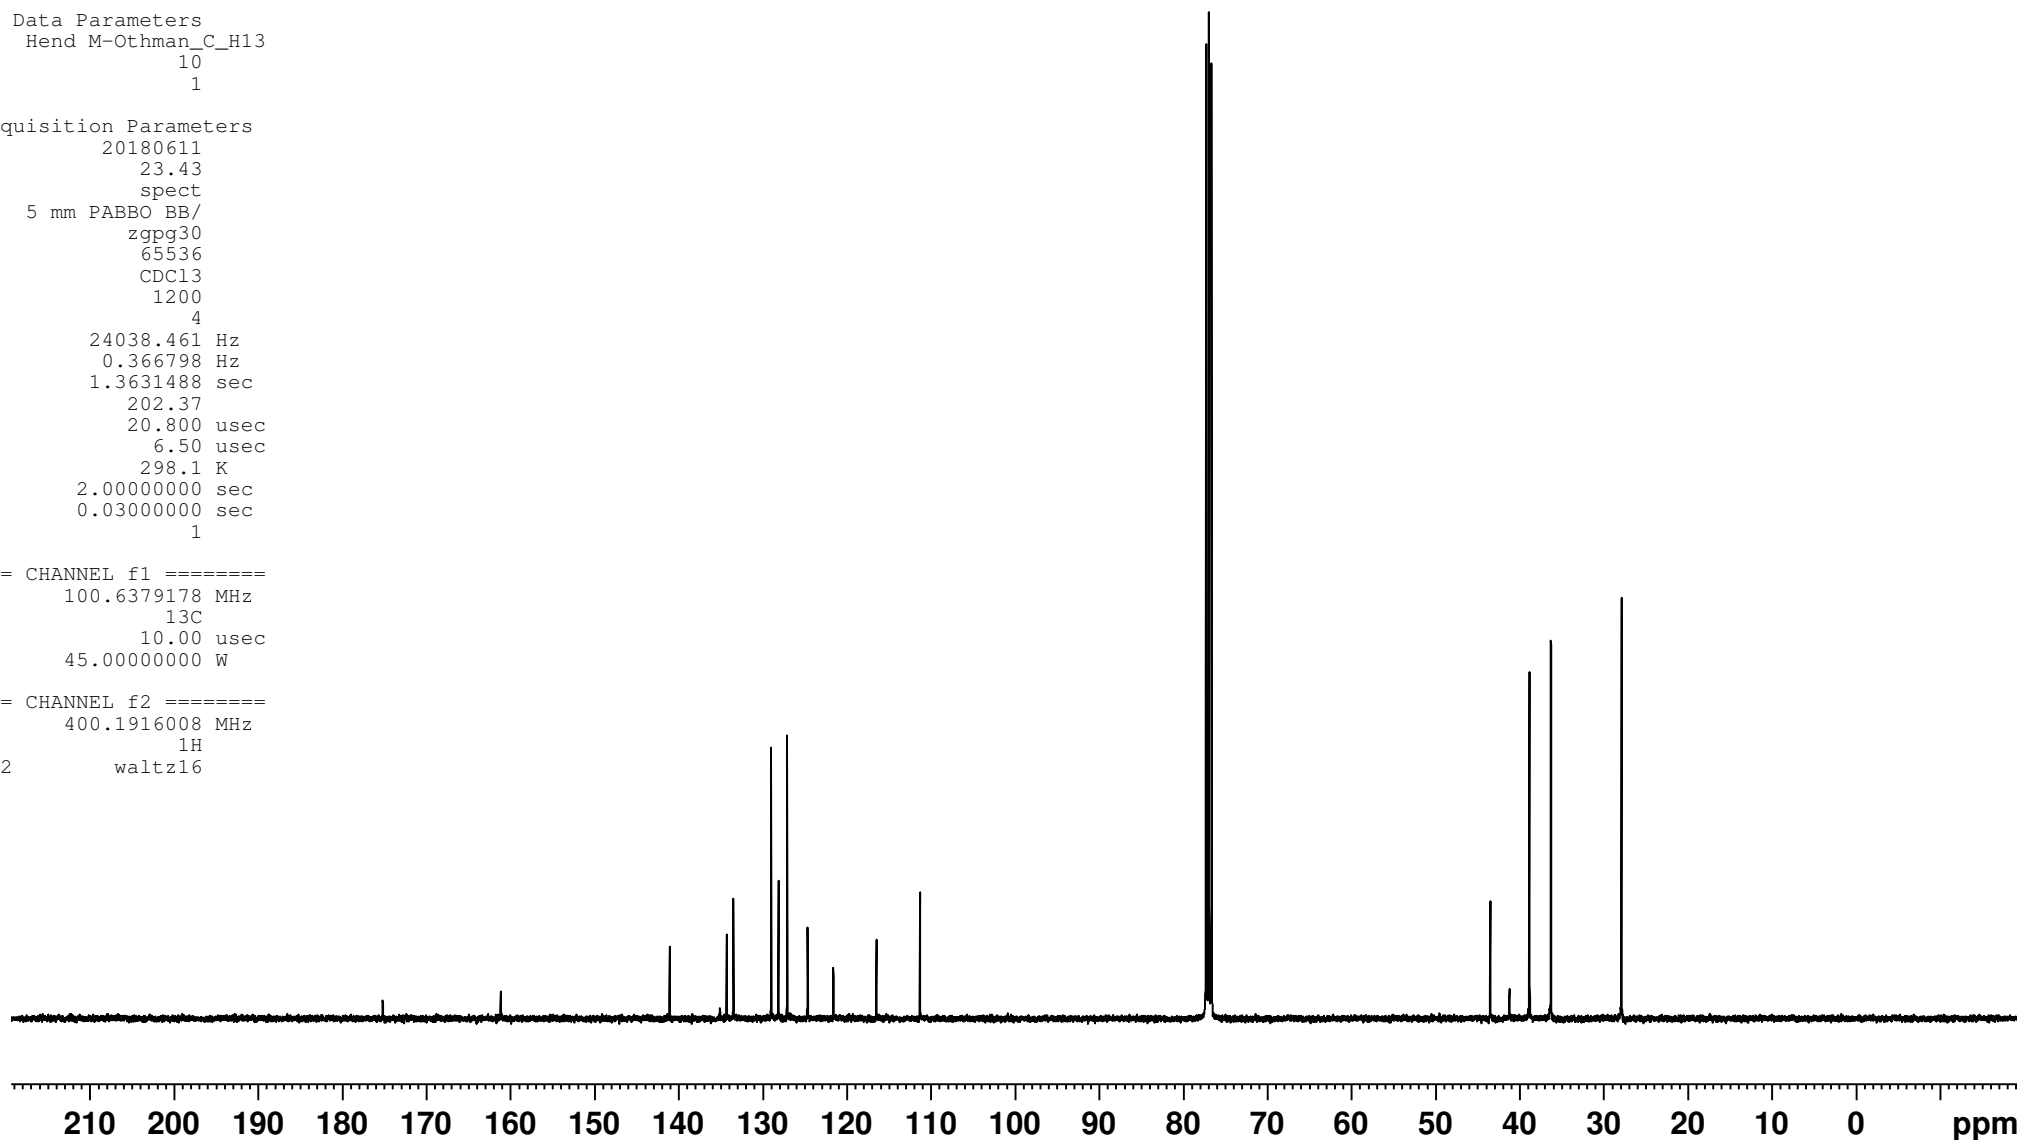



—175.29

—161.25

—141.16

—135.21

—134.38

—133.60

—129.10

—128.22

—127.19

—124.76

—121.69

—116.57

—111.38

Current Data Parameters  
NAME Hend M-Othman\_C\_H13  
EXPNO 10  
PROCNO 1

F2 - Acquisition Parameters  
Date\_ 20180611  
Time 23.43  
INSTRUM spect  
PROBHD 5 mm PABBO BB/  
PULPROG zgpg30  
TD 65536  
SOLVENT CDC13  
NS 1200  
DS 4  
SWH 24038.461 Hz  
FIDRES 0.366798 Hz  
AQ 1.3631488 sec  
RG 202.37  
DW 20.800 usec  
DE 6.50 usec  
TE 298.1 K  
D1 2.00000000 sec  
D11 0.03000000 sec  
TDO 1

===== CHANNEL f1 =====  
SFO1 100.6379178 MHz  
NUC1 13C  
P1 10.00 usec  
PLW1 45.00000000 W

===== CHANNEL f2 =====  
SFO2 400.1916008 MHz  
NUC2 1H  
CPDPRG[2] waltz16

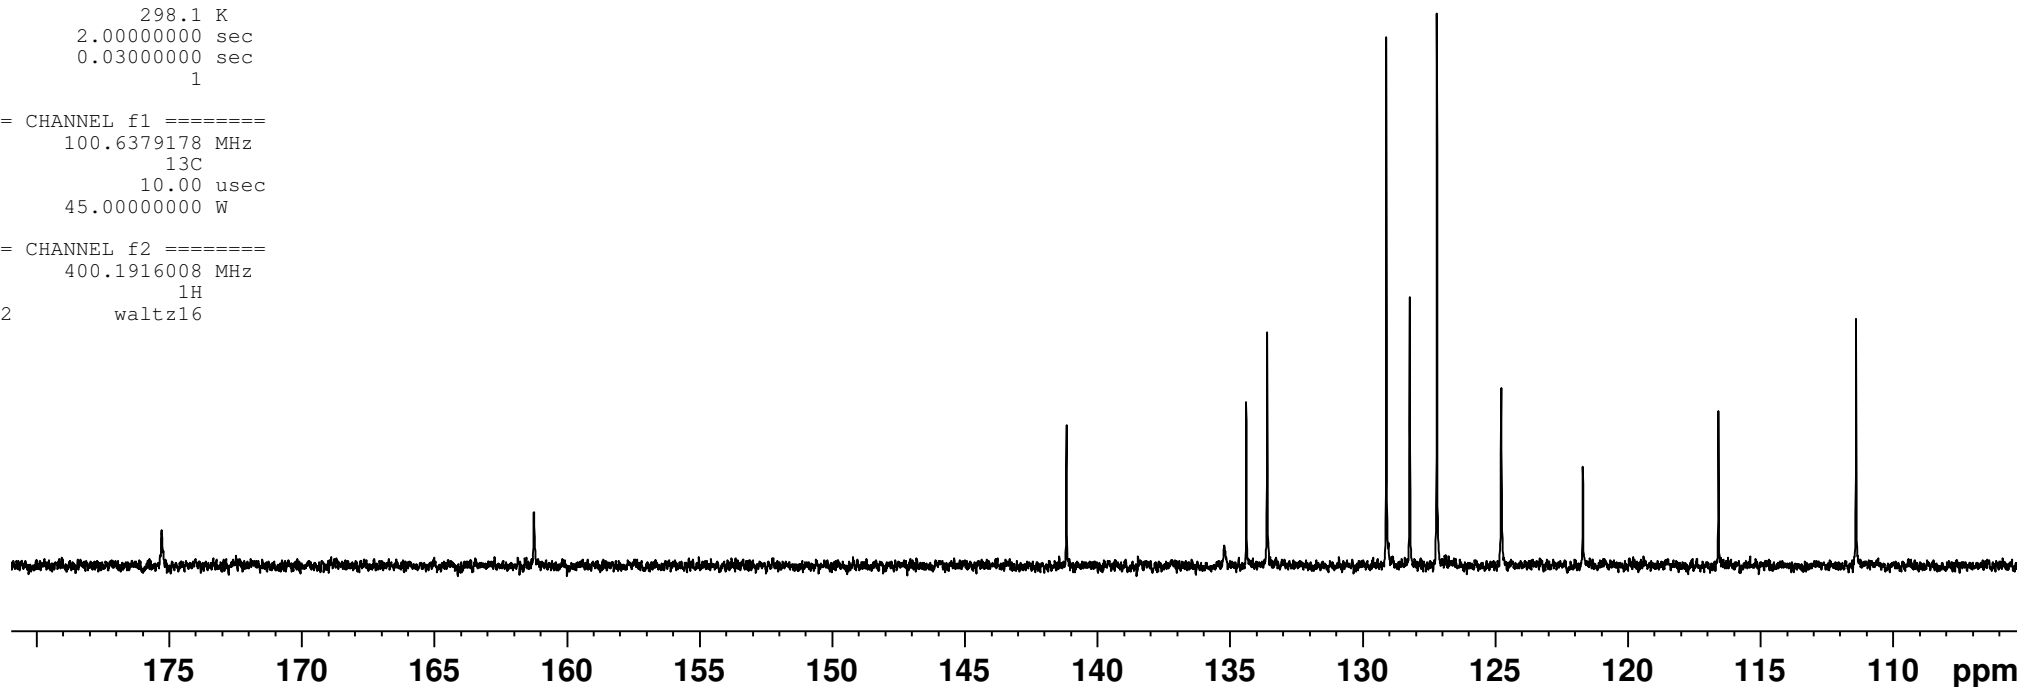

77.36  
77.05  
76.73

43.56

41.28

38.90

36.35

27.95

Current Data Parameters  
NAME Hend M-Othman\_C\_H13  
EXPNO 10  
PROCNO 1

F2 - Acquisition Parameters  
Date\_ 20180611  
Time 23.43  
INSTRUM spect  
PROBHD 5 mm PABBO BB/  
PULPROG zgpg30  
TD 65536  
SOLVENT CDCl3  
NS 1200  
DS 4  
SWH 24038.461 Hz  
FIDRES 0.366798 Hz  
AQ 1.3631488 sec  
RG 202.37  
DW 20.800 usec  
DE 6.50 usec  
TE 298.1 K  
D1 2.00000000 sec  
D11 0.03000000 sec  
TD0 1

===== CHANNEL f1 =====  
SFO1 100.6379178 MHz  
NUC1 13C  
P1 10.00 usec  
PLW1 45.00000000 W

===== CHANNEL f2 =====  
SFO2 400.1916008 MHz  
NUC2 1H  
CPDPRG[2] waltz16

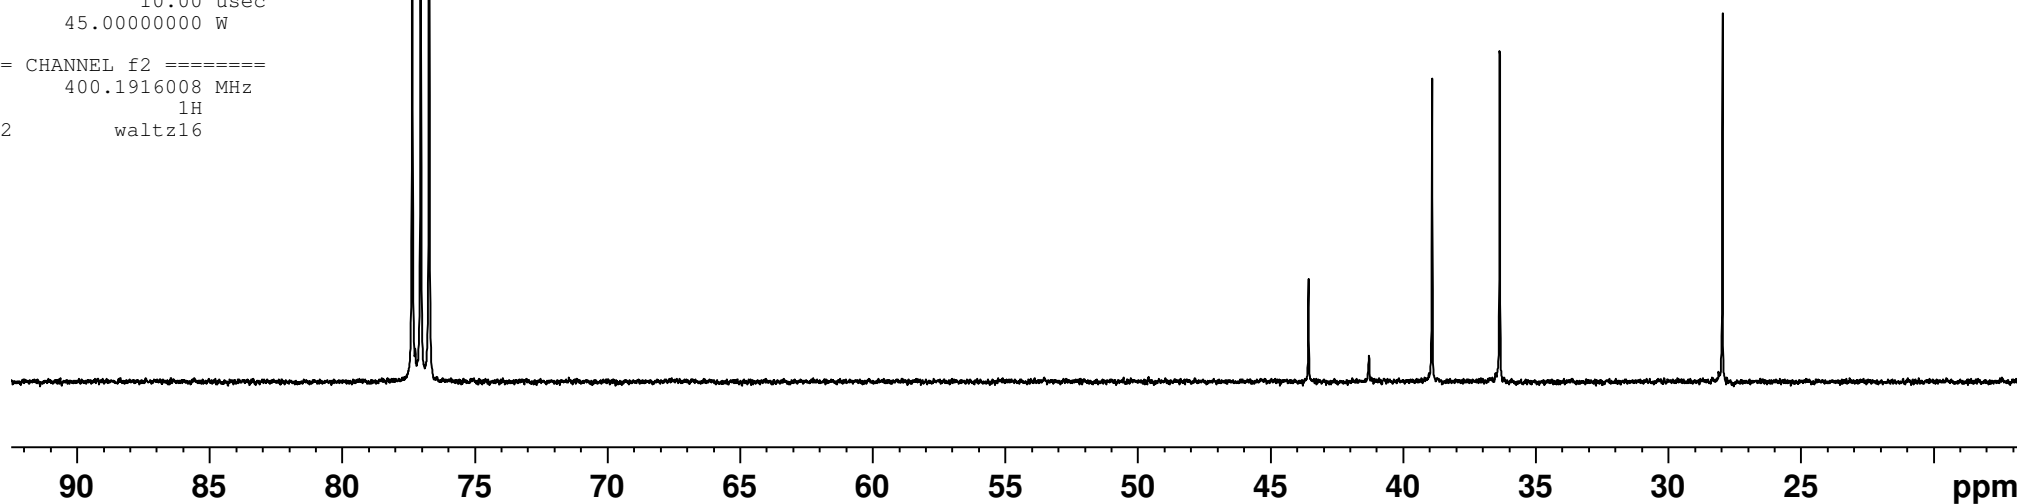

Current Data Parameters  
NAME Hend M-Othman\_H\_H4  
EXPNO 10  
PROCNO 1

F2 - Acquisition Parameters  
Date\_ 20180611  
Time 14.59  
INSTRUM spect  
PROBHD 5 mm PABBO BB/  
PULPROG zg30  
TD 65536  
SOLVENT CDCl3  
NS 32  
DS 2  
SWH 8012.820 Hz  
FIDRES 0.122266 Hz  
AQ 4.0894465 sec  
RG 72.66  
DW 62.400 usec  
DE 6.50 usec  
TE 298.0 K  
D1 1.00000000 sec  
TD0 1

===== CHANNEL f1 =====  
SFO1 400.1924713 MHz  
NUC1 1H  
P1 15.00 usec  
PLW1 10.39999962 W

F2 - Processing parameters  
SI 65536  
SF 400.1900000 MHz  
WDW EM  
SSB 0  
LB 0.30 Hz  
GB 0  
PC 1.00

8.7265  
8.2067  
8.1119  
7.6427  
7.2953  
7.1837  
  
5.3183  
5.3093  
5.2044  
4.9028  
4.7355  
4.6414  
4.1430  
3.6730  
  
2.0389  
1.9166  
1.7538  
  
0.9091

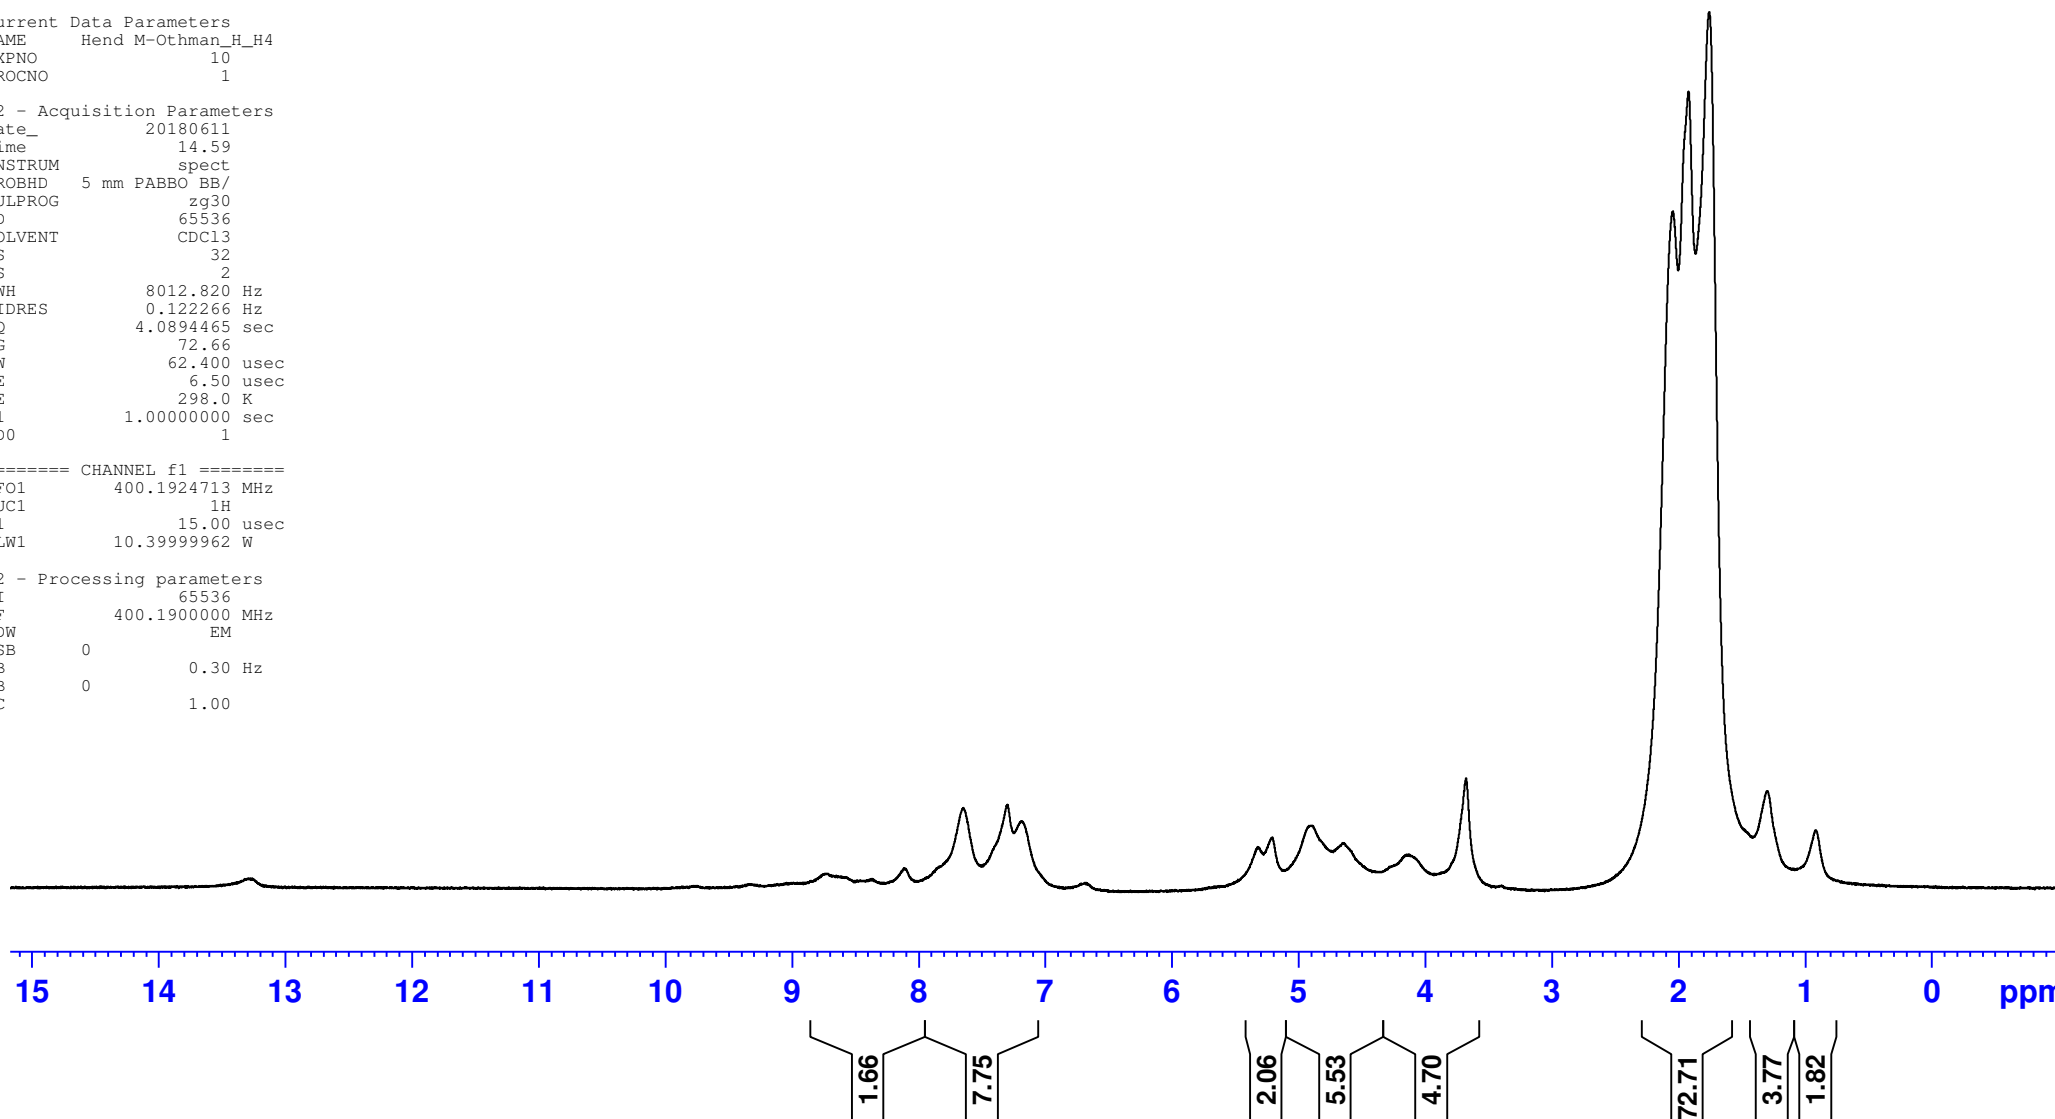

Current Data Parameters  
NAME Hend M-Othman\_H\_H4  
EXPNO 10  
PROCNO 1

F2 - Acquisition Parameters  
Date\_ 20180611  
Time 14.59  
INSTRUM spect  
PROBHD 5 mm PABBO BB/  
PULPROG zg30  
TD 65536  
SOLVENT CDCl3  
NS 32  
DS 2  
SWH 8012.820 Hz  
FIDRES 0.122266 Hz  
AQ 4.0894465 sec  
RG 72.66  
DW 62.400 usec  
DE 6.50 usec  
TE 298.0 K  
D1 1.00000000 sec  
TD0 1

===== CHANNEL f1 =====  
SFO1 400.1924713 MHz  
NUC1 1H  
P1 15.00 usec  
PLW1 10.39999962 W

F2 - Processing parameters  
SI 65536  
SF 400.1900000 MHz  
WDW EM  
SSB 0  
LB 0.30 Hz  
GB 0  
PC 1.00

8.7265  
8.2067  
8.1119  
7.6427  
7.2953  
7.1837  
  
5.3183  
5.3093  
5.2044  
4.9028  
4.7355  
4.6414  
4.1430  
3.6730  
  
2.0389  
1.9166  
1.7538  
  
0.9091

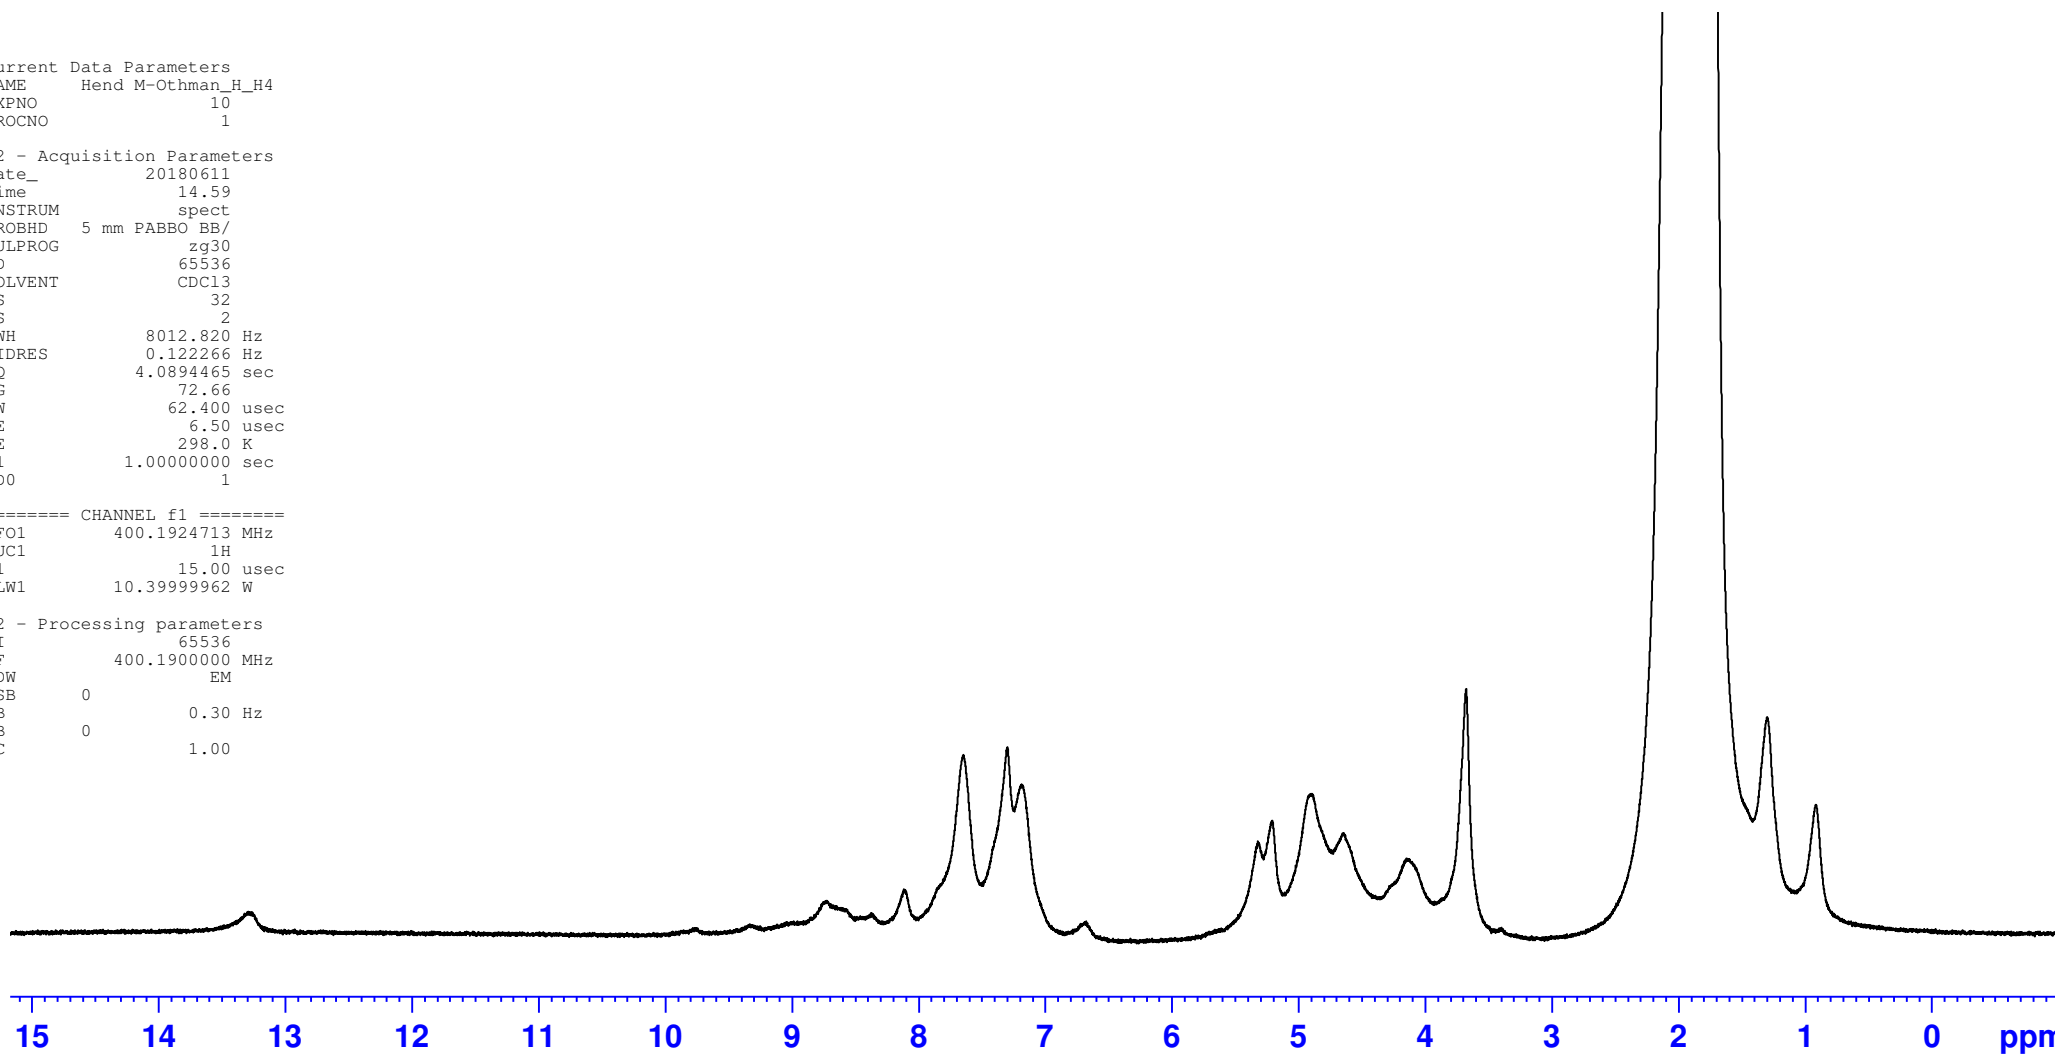

1.66  
7.75  
  
2.06  
5.53  
4.70  
  
72.71  
3.77  
1.82

Current Data Parameters  
NAME Hend M-Othman\_H\_H7  
EXPNO 10  
PROCNO 1

F2 - Acquisition Parameters  
Date\_ 20180611  
Time 16.15  
INSTRUM spect  
PROBHD 5 mm PABBO BB/  
PULPROG zg30  
TD 65536  
SOLVENT CDCl3  
NS 32  
DS 2  
SWH 8012.820 Hz  
FIDRES 0.122266 Hz  
AQ 4.0894465 sec  
RG 64.21  
DW 62.400 usec  
DE 6.50 usec  
TE 298.1 K  
D1 1.00000000 sec  
TD0 1

===== CHANNEL f1 =====  
SFO1 400.1924713 MHz  
NUC1 1H  
P1 15.00 usec  
PLW1 10.39999962 W

F2 - Processing parameters  
SI 65536  
SF 400.1900000 MHz  
WDW EM  
SSB 0  
LB 0.30 Hz  
GB 0  
PC 1.00

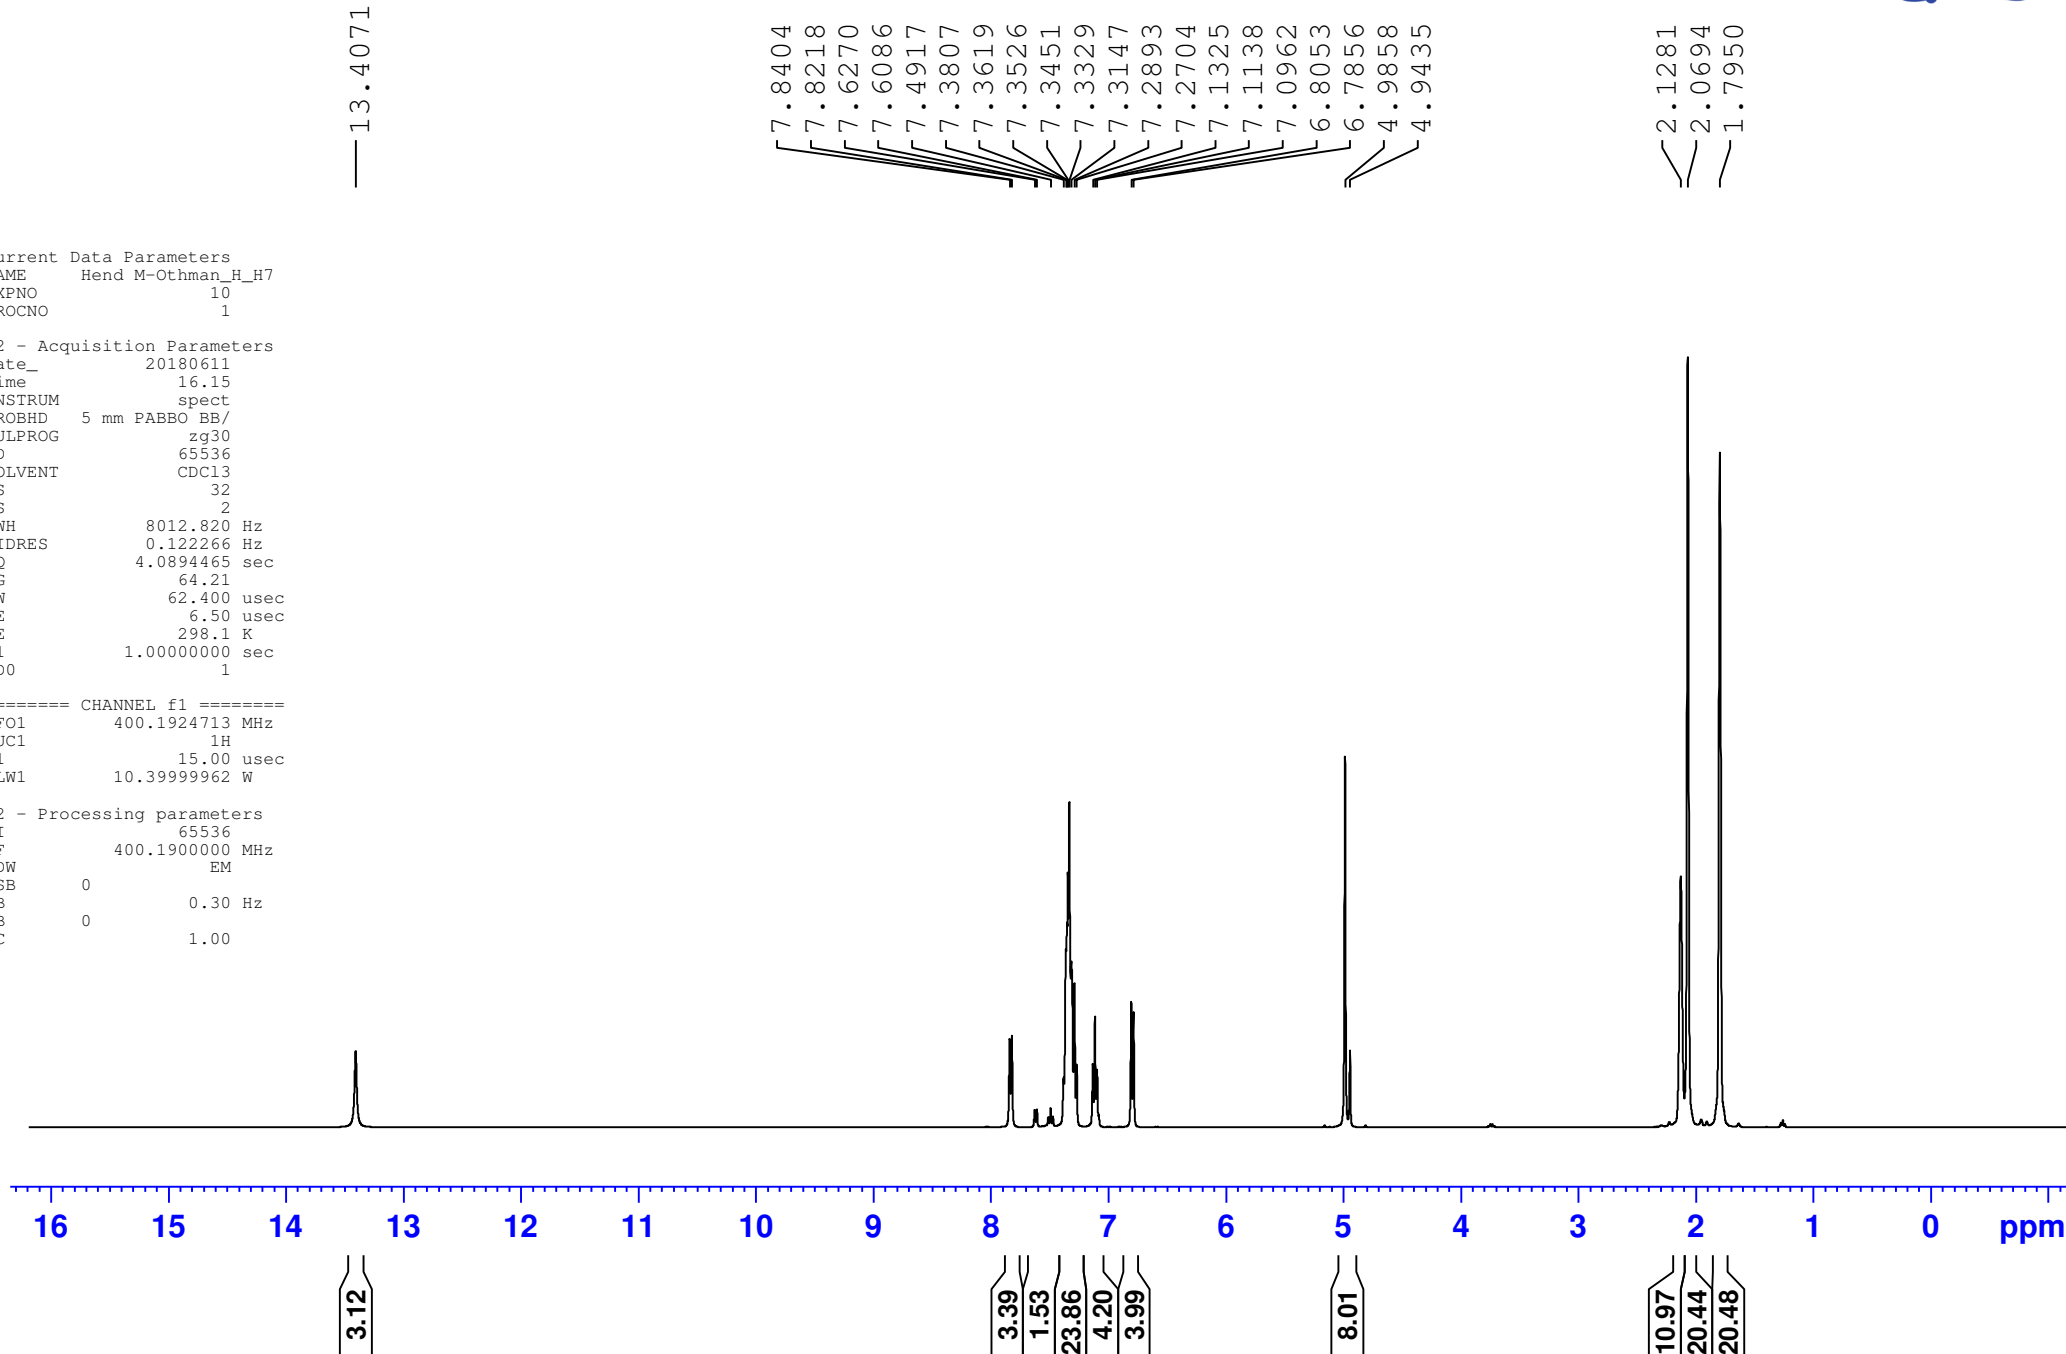

7.8404  
7.82187.6270  
7.6086

7.4917

7.3807  
7.3619  
7.3526  
7.3451  
7.3329  
7.3147  
7.2893  
7.27047.1325  
7.1138  
7.09626.8053  
6.7856

Current Data Parameters  
NAME Hend M-Othman\_H\_H7  
EXPNO 10  
PROCNO 1

F2 - Acquisition Parameters  
Date\_ 20180611  
Time 16.15  
INSTRUM spect  
PROBHD 5 mm PABBO BB/  
PULPROG zg30  
TD 65536  
SOLVENT CDCl3  
NS 32  
DS 2  
SWH 8012.820 Hz  
FIDRES 0.122266 Hz  
AQ 4.0894465 sec  
RG 64.21  
DW 62.400 usec  
DE 6.50 usec  
TE 298.1 K  
D1 1.00000000 sec  
TD0 1

===== CHANNEL f1 =====  
SFO1 400.1924713 MHz  
NUC1 1H  
P1 15.00 usec  
PLW1 10.39999962 W

F2 - Processing parameters  
SI 65536  
SF 400.1900000 MHz  
WDW EM  
SSB 0  
LB 0.30 Hz  
GB 0  
PC 1.00

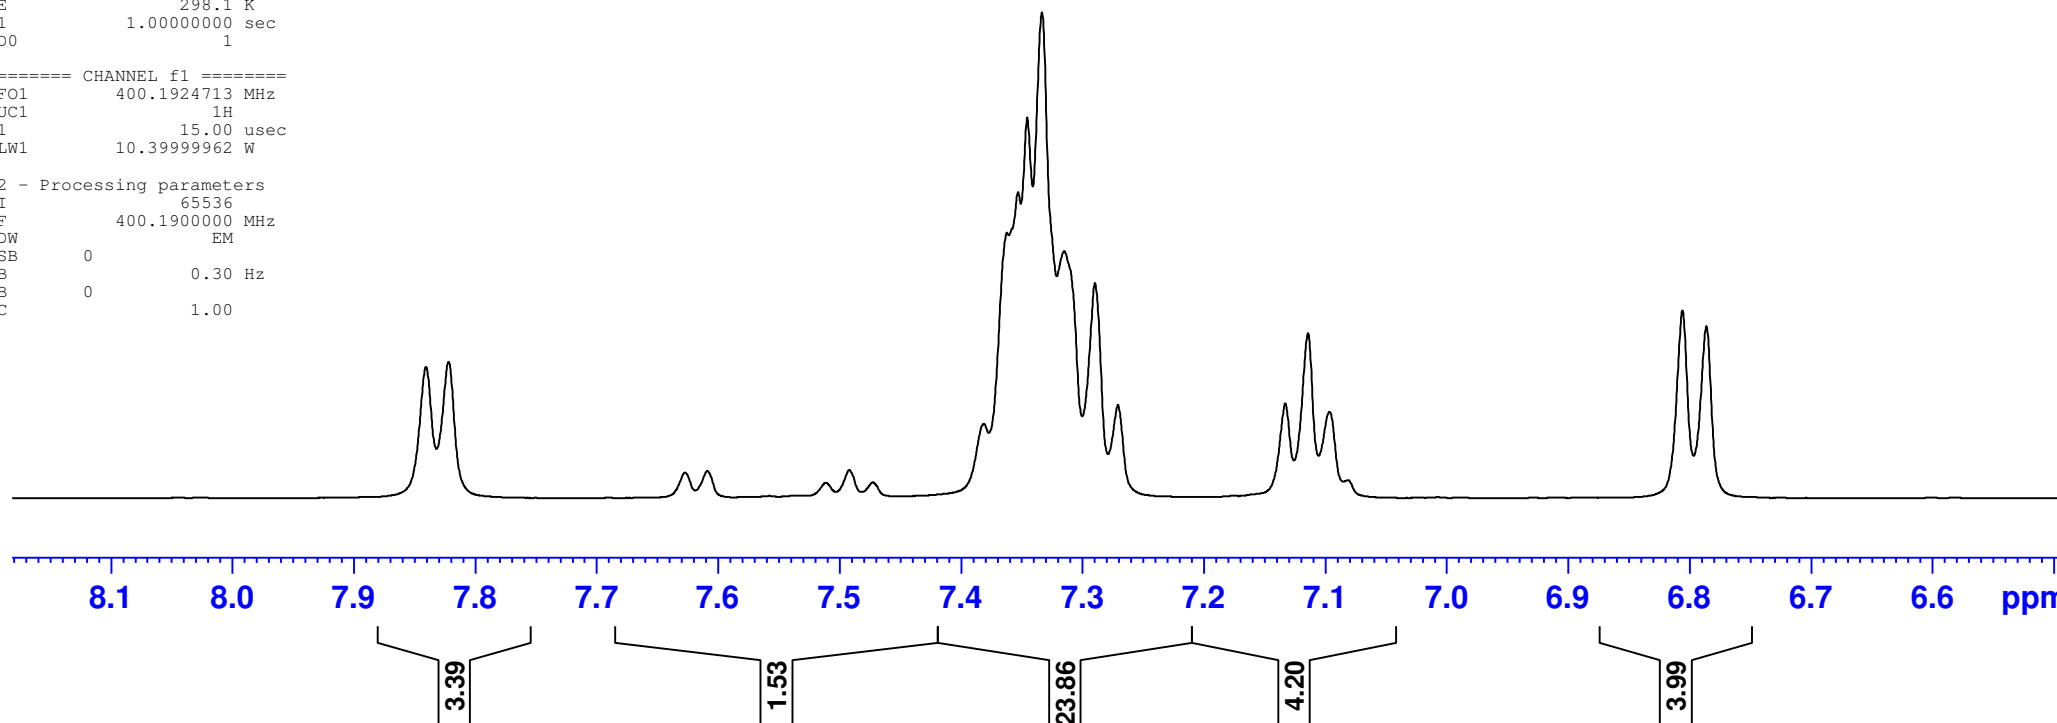

Current Data Parameters  
NAME Hend M-Othman\_H\_H7  
EXPNO 10  
PROCNO 1

F2 - Acquisition Parameters  
Date\_ 20180611  
Time 16.15  
INSTRUM spect  
PROBHD 5 mm PABBO BB/  
PULPROG zg30  
TD 65536  
SOLVENT CDCl3  
NS 32  
DS 2  
SWH 8012.820 Hz  
FIDRES 0.122266 Hz  
AQ 4.0894465 sec  
RG 64.21  
DW 62.400 usec  
DE 6.50 usec  
TE 298.1 K  
D1 1.00000000 sec  
TD0 1

===== CHANNEL f1 =====  
SFO1 400.1924713 MHz  
NUC1 1H  
P1 15.00 usec  
PLW1 10.39999962 W

F2 - Processing parameters  
SI 65536  
SF 400.1900000 MHz  
WDW EM  
SSB 0  
LB 0.30 Hz  
GB 0  
PC 1.00

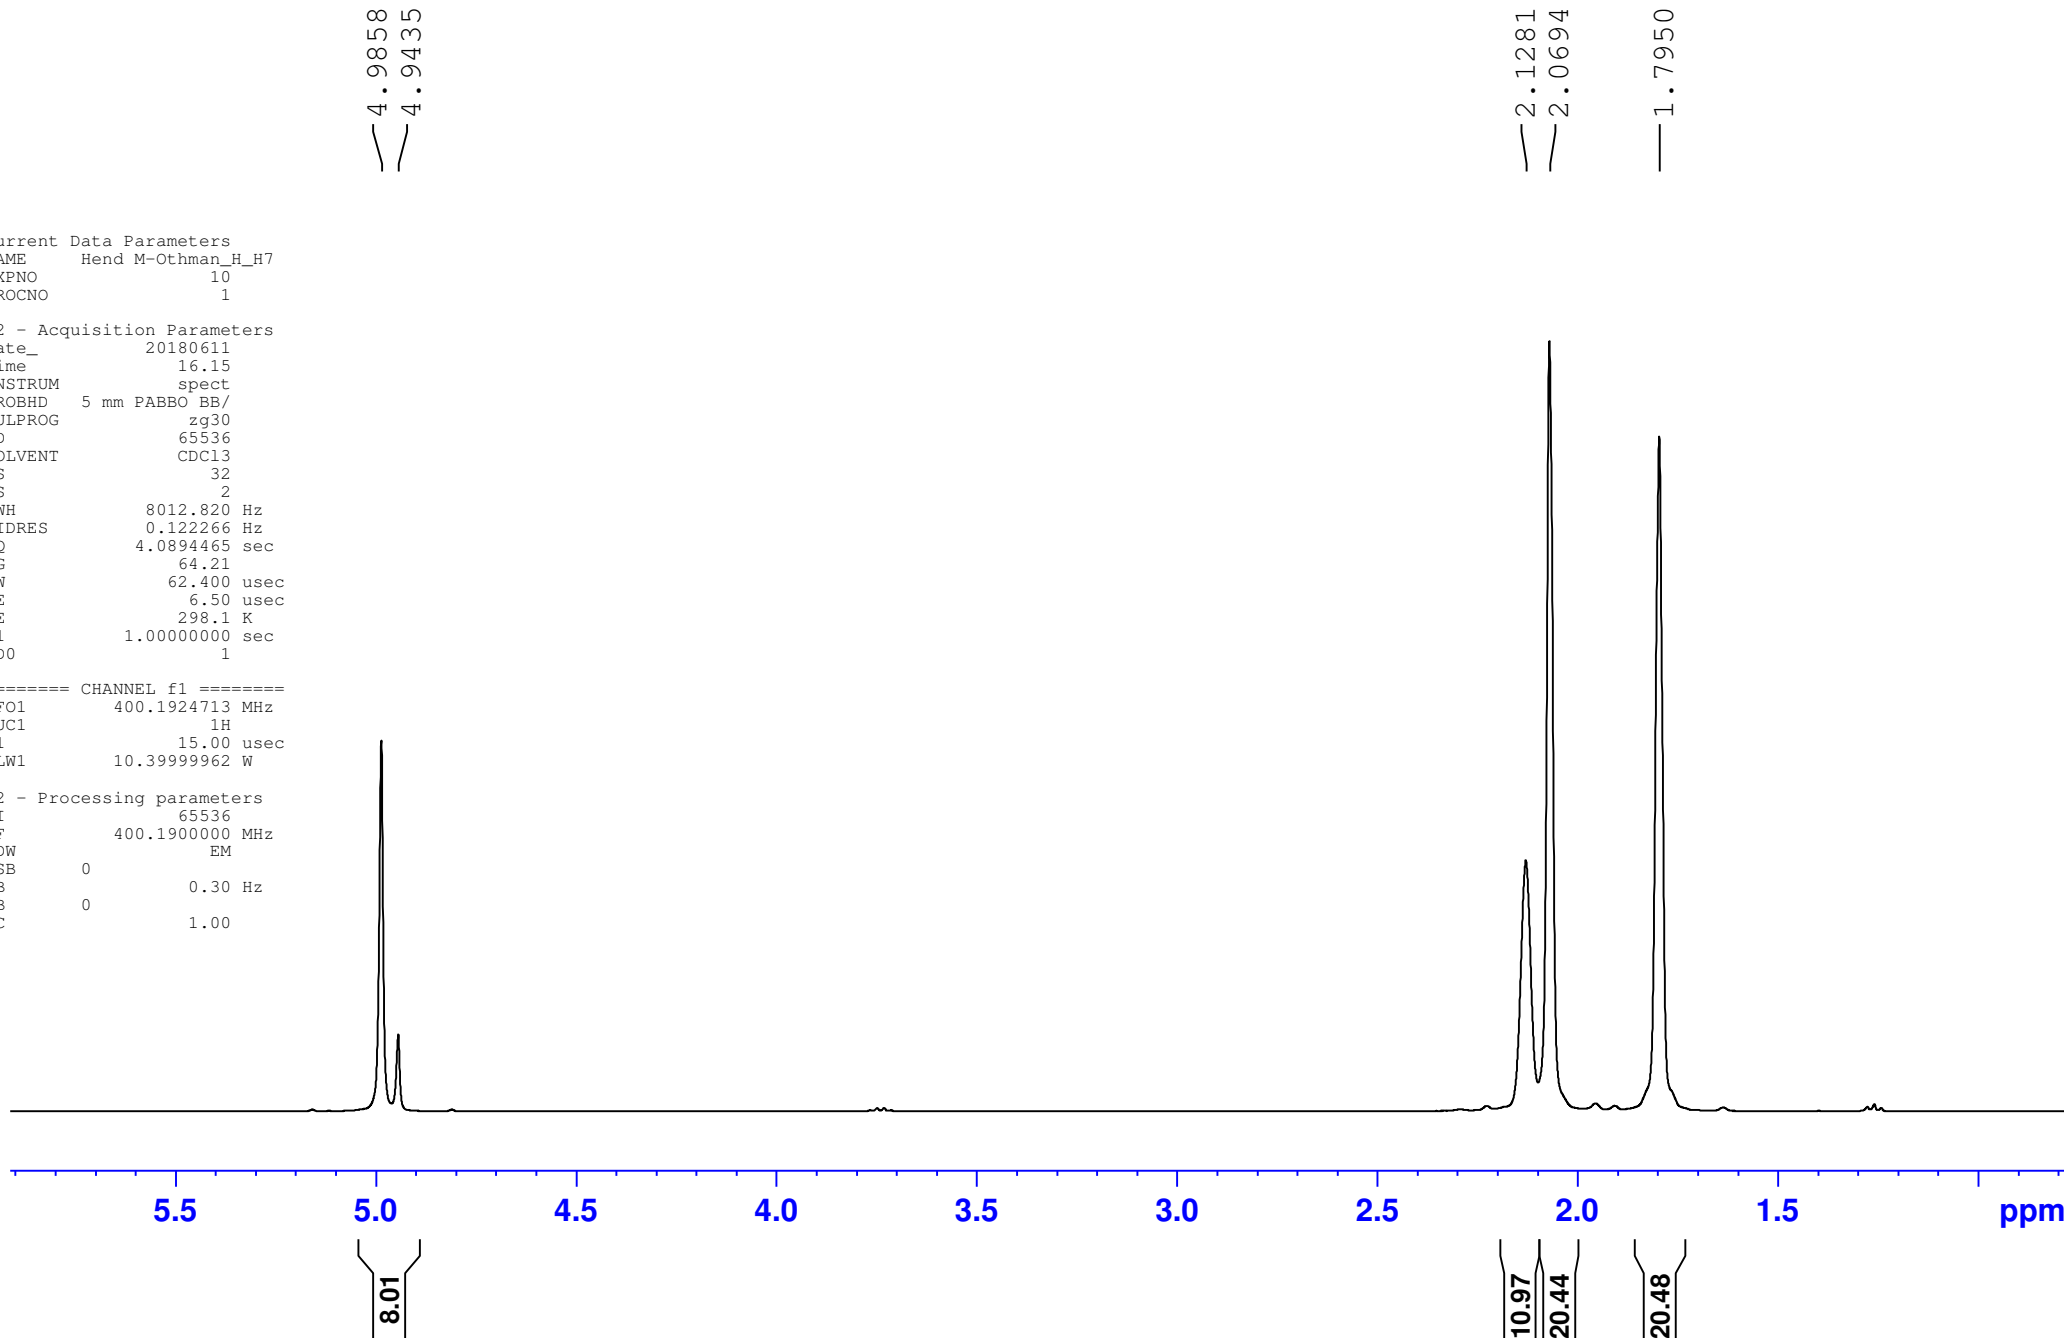

Current Data Parameters  
NAME Hend M-Othman\_H\_H8  
EXPNO 10  
PROCNO 1

F2 - Acquisition Parameters  
Date\_ 20180611  
Time 23.48  
INSTRUM spect  
PROBHD 5 mm PABBO BB/  
PULPROG zg30  
TD 65536  
SOLVENT DMSO  
NS 32  
DS 2  
SWH 8012.820 Hz  
FIDRES 0.122266 Hz  
AQ 4.0894465 sec  
RG 91.58  
DW 62.400 usec  
DE 6.50 usec  
TE 298.1 K  
D1 1.00000000 sec  
TD0 1

===== CHANNEL f1 =====  
SFO1 400.1924713 MHz  
NUC1 1H  
P1 15.00 usec  
PLW1 10.39999962 W

F2 - Processing parameters  
SI 65536  
SF 400.1900000 MHz  
WDW EM  
SSB 0  
LB 0.30 Hz  
GB 0  
PC 1.00

8.7043  
7.6055  
7.5867  
7.4602  
7.4407  
7.2253  
7.2056  
7.1805  
7.1617  
7.1428  
4.0788  
4.0628  
3.7695  
3.7520  
3.7344  
3.4534  
3.4362  
3.4185  
3.4019  
2.5097  
1.9434  
1.9120  
1.7606  
1.6894  
1.6583  
1.6412  
1.6121  
1.2987  
1.2283  
0.8620  
0.8462  
0.8293

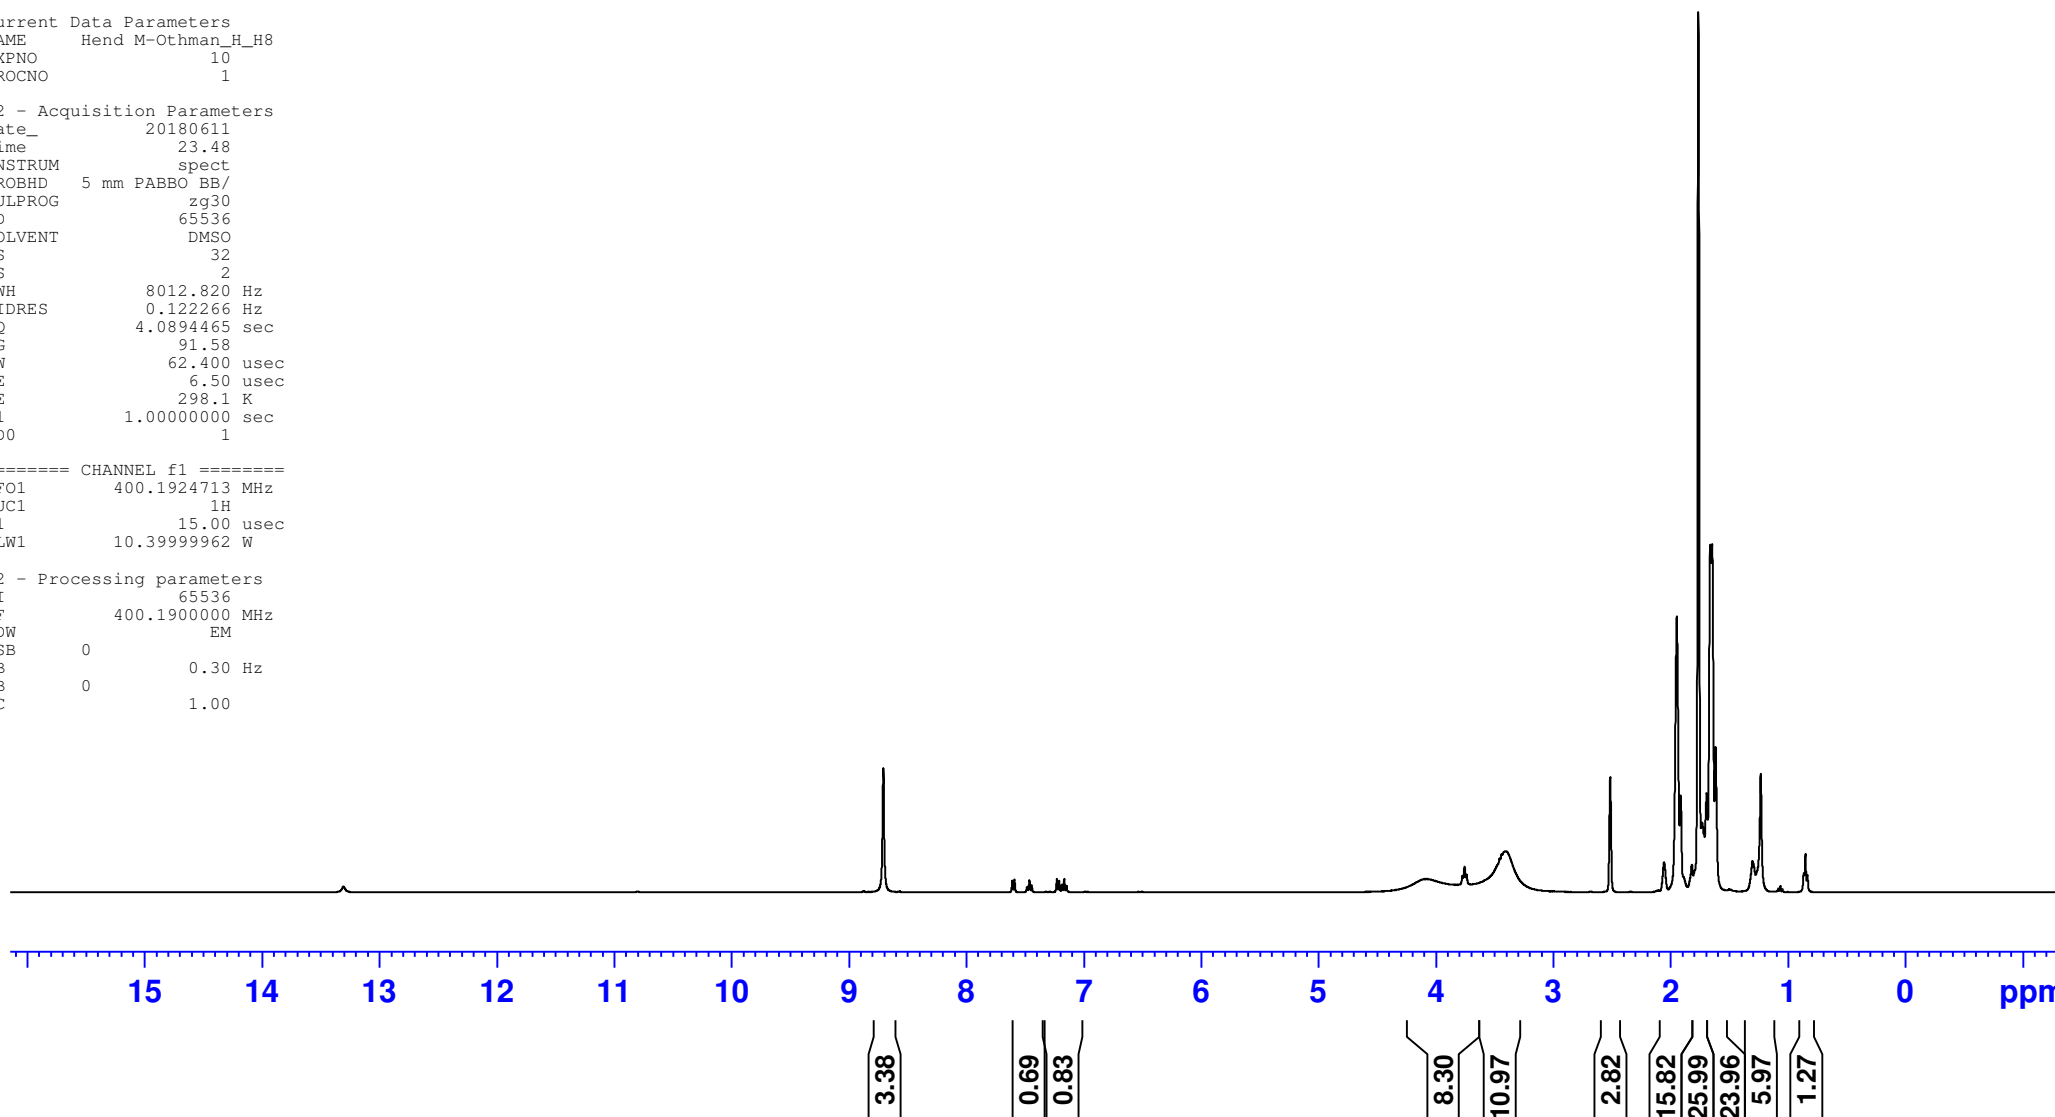

Current Data Parameters  
NAME Hend M-Othman\_H\_H8  
EXPNO 10  
PROCNO 1

F2 - Acquisition Parameters  
Date\_ 20180611  
Time 23.48  
INSTRUM spect  
PROBHD 5 mm PABBO BB/  
PULPROG zg30  
TD 65536  
SOLVENT DMSO  
NS 32  
DS 2  
SWH 8012.820 Hz  
FIDRES 0.122266 Hz  
AQ 4.0894465 sec  
RG 91.58  
DW 62.400 usec  
DE 6.50 usec  
TE 298.1 K  
D1 1.00000000 sec  
TD0 1

===== CHANNEL f1 =====  
SFO1 400.1924713 MHz  
NUC1 1H  
P1 15.00 usec  
PLW1 10.39999962 W

F2 - Processing parameters  
SI 65536  
SF 400.1900000 MHz  
WDW EM  
SSB 0  
LB 0.30 Hz  
GB 0  
PC 1.00

8.7043  
7.6055  
7.5867  
7.4602  
7.4407  
7.2253  
7.2056  
7.1805  
7.1617  
7.1428  
4.0788  
4.0628  
3.7695  
3.7520  
3.7344  
3.4534  
3.4362  
3.4185  
3.4019  
2.5097  
1.9434  
1.9120  
1.7606  
1.6894  
1.6583  
1.6412  
1.6121  
1.2987  
1.2283  
0.8620  
0.8462  
0.8293

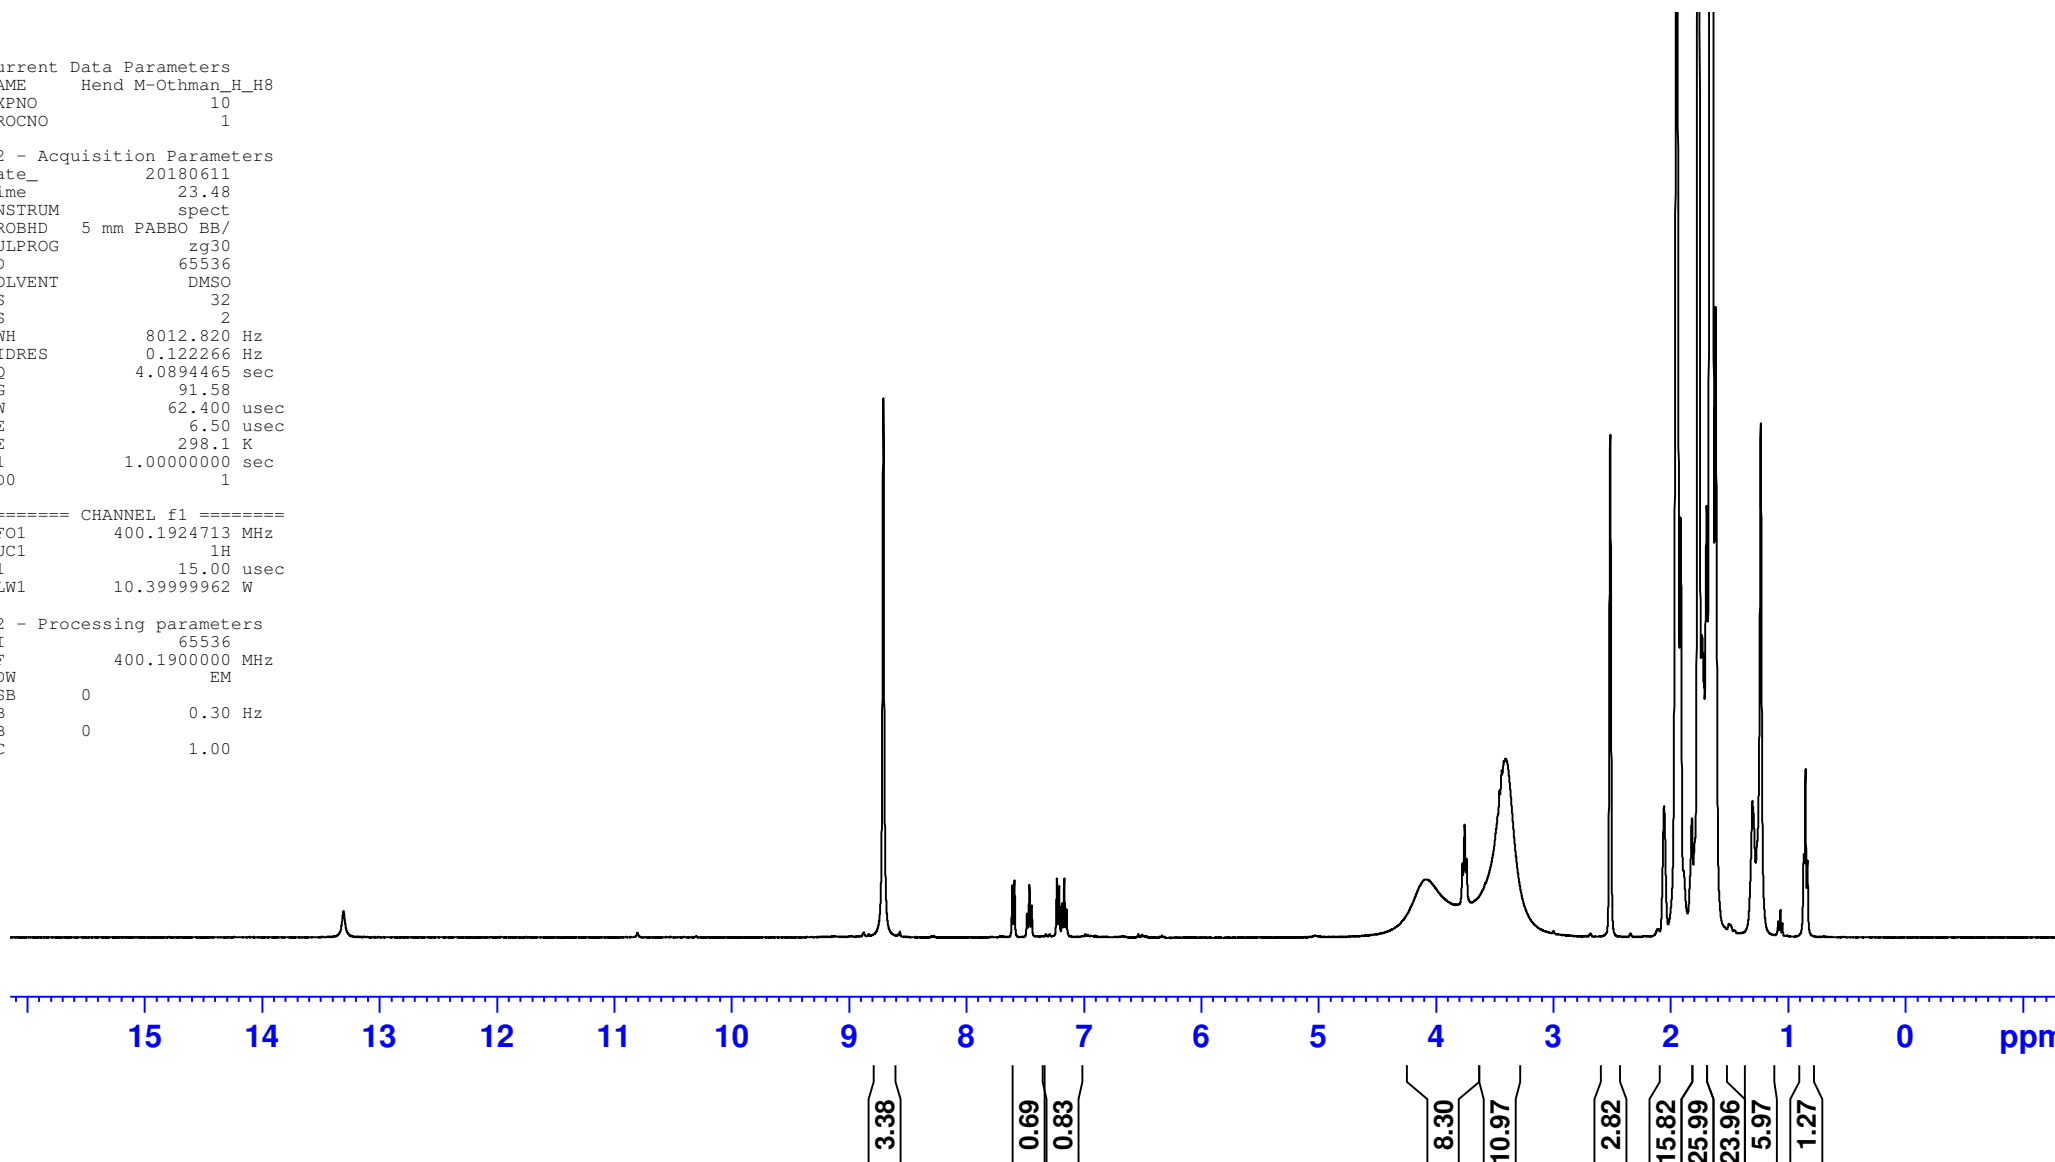

Current Data Parameters  
NAME Hend M-Othman\_H\_H8  
EXPNO 10  
PROCNO 1

F2 - Acquisition Parameters  
Date\_ 20180611  
Time 23.48  
INSTRUM spect  
PROBHD 5 mm PABBO BB/  
PULPROG zg30  
TD 65536  
SOLVENT DMSO  
NS 32  
DS 2  
SWH 8012.820 Hz  
FIDRES 0.122266 Hz  
AQ 4.0894465 sec  
RG 91.58  
DW 62.400 usec  
DE 6.50 usec  
TE 298.1 K  
D1 1.00000000 sec  
TD0 1

===== CHANNEL f1 =====  
SFO1 400.1924713 MHz  
NUC1 1H  
P1 15.00 usec  
PLW1 10.39999962 W

F2 - Processing parameters  
SI 65536  
SF 400.1900000 MHz  
WDW EM  
SSB 0  
LB 0.30 Hz  
GB 0  
PC 1.00

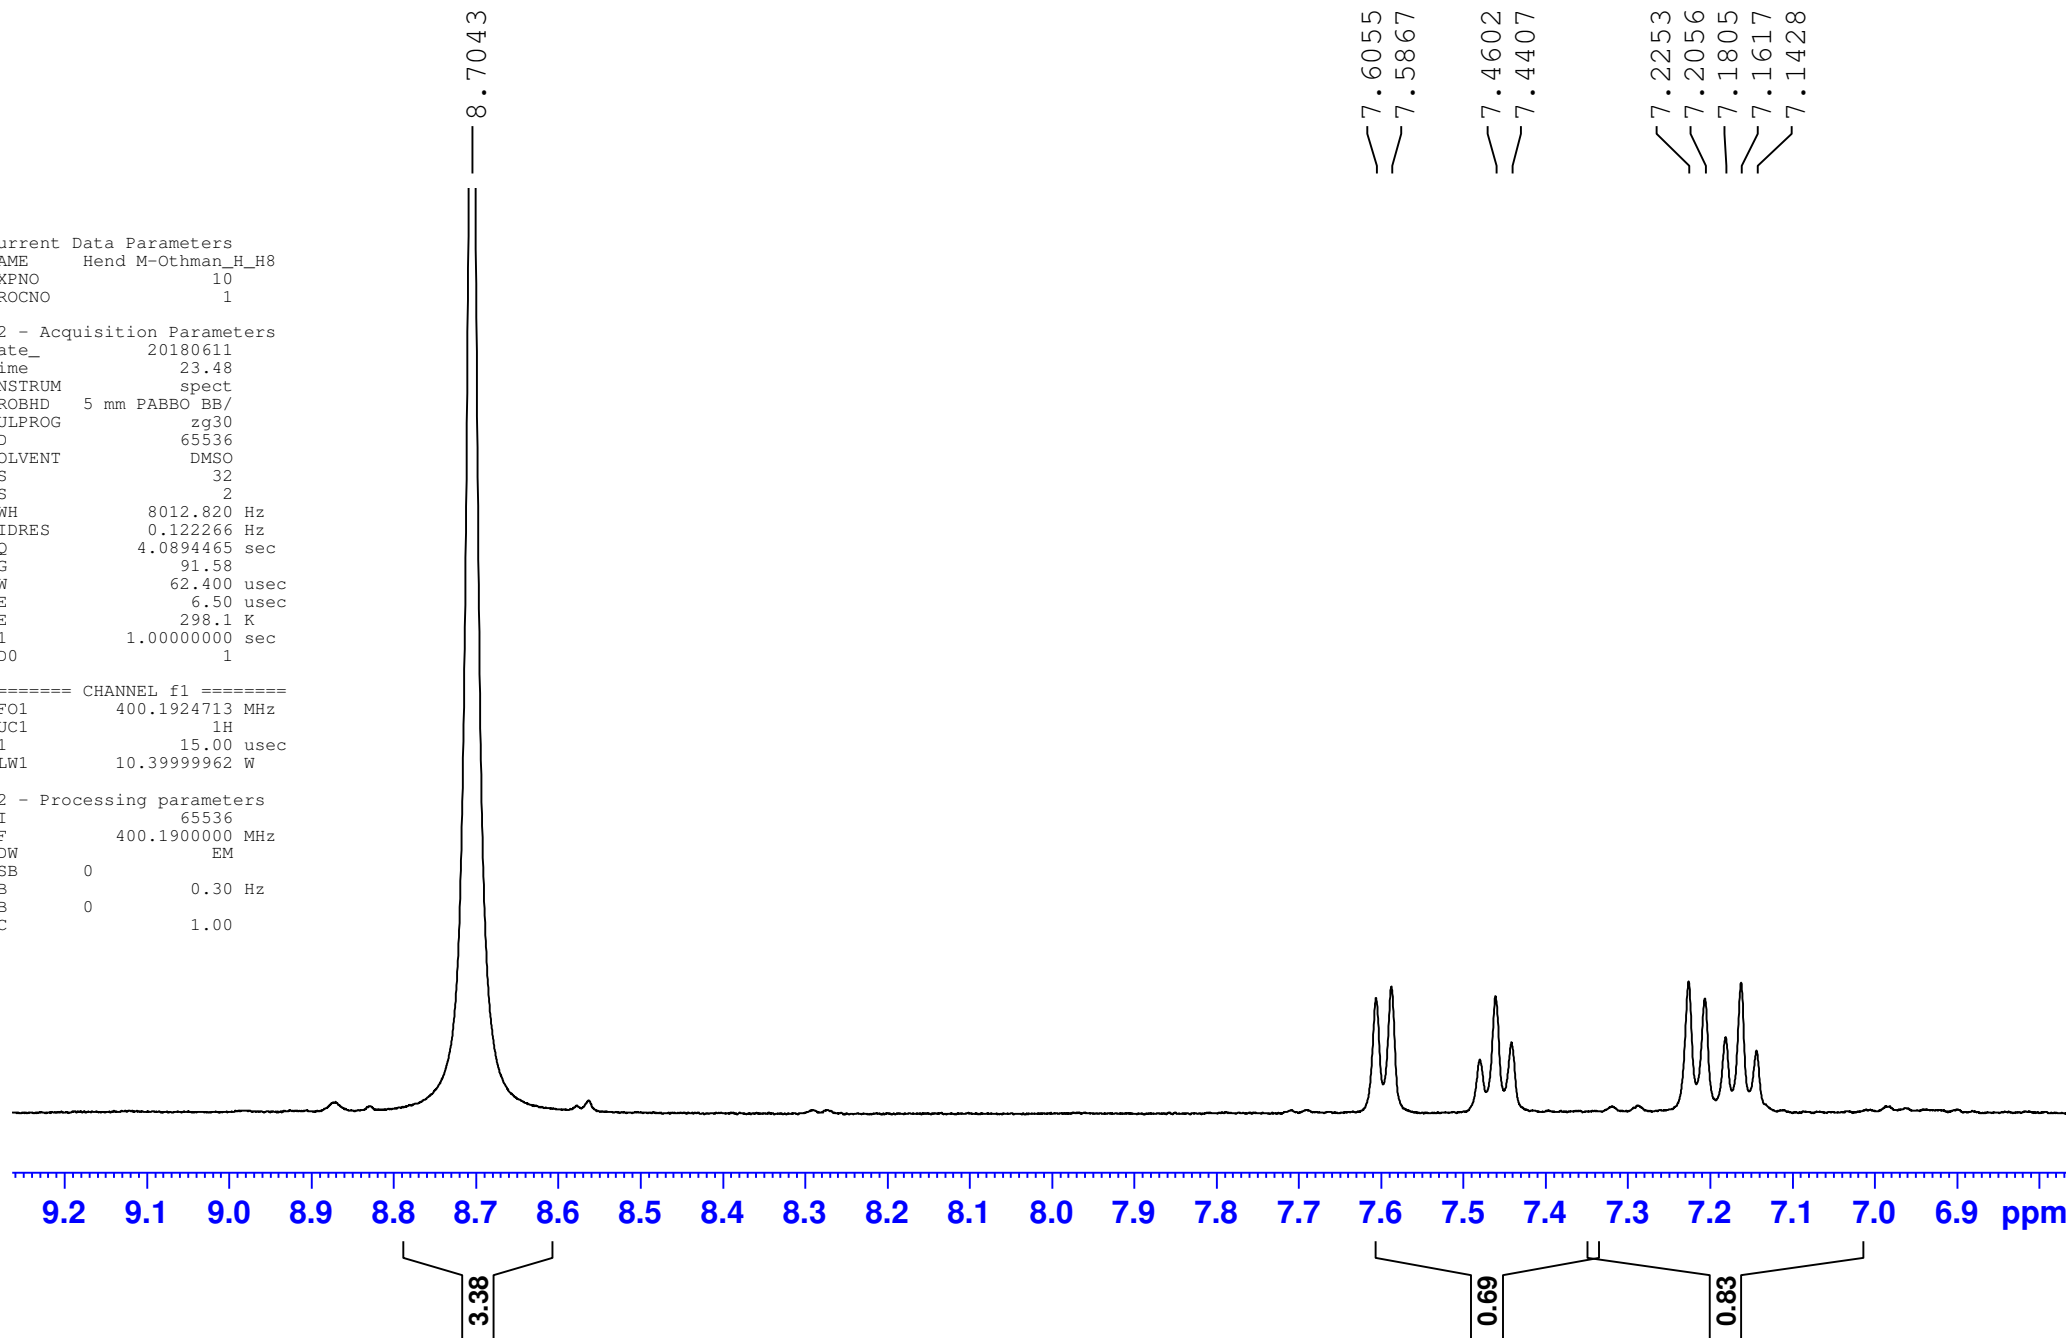

4.0788  
4.0628  
3.7695  
3.7520  
3.7344  
3.4534  
3.4362  
3.4185  
3.4019

2.5097

1.9434  
1.9120  
1.7606  
1.6894  
1.6583  
1.6412  
1.6121

1.2987  
1.2283

0.8620  
0.8462  
0.8293

Current Data Parameters  
NAME Hend M-Othman\_H\_H8  
EXPNO 10  
PROCNO 1

F2 - Acquisition Parameters  
Date\_ 20180611  
Time 23.48  
INSTRUM spect  
PROBHD 5 mm PABBO BB/  
PULPROG zg30  
TD 65536  
SOLVENT DMSO  
NS 32  
DS 2  
SWH 8012.820 Hz  
FIDRES 0.122266 Hz  
AQ 4.0894465 sec  
RG 91.58  
DW 62.400 usec  
DE 6.50 usec  
TE 298.1 K  
D1 1.00000000 sec  
TD0 1

===== CHANNEL f1 =====  
SFO1 400.1924713 MHz  
NUC1 1H  
P1 15.00 usec  
PLW1 10.39999962 W

F2 - Processing parameters  
SI 65536  
SF 400.1900000 MHz  
WDW EM  
SSB 0  
LB 0.30 Hz  
GB 0  
PC 1.00

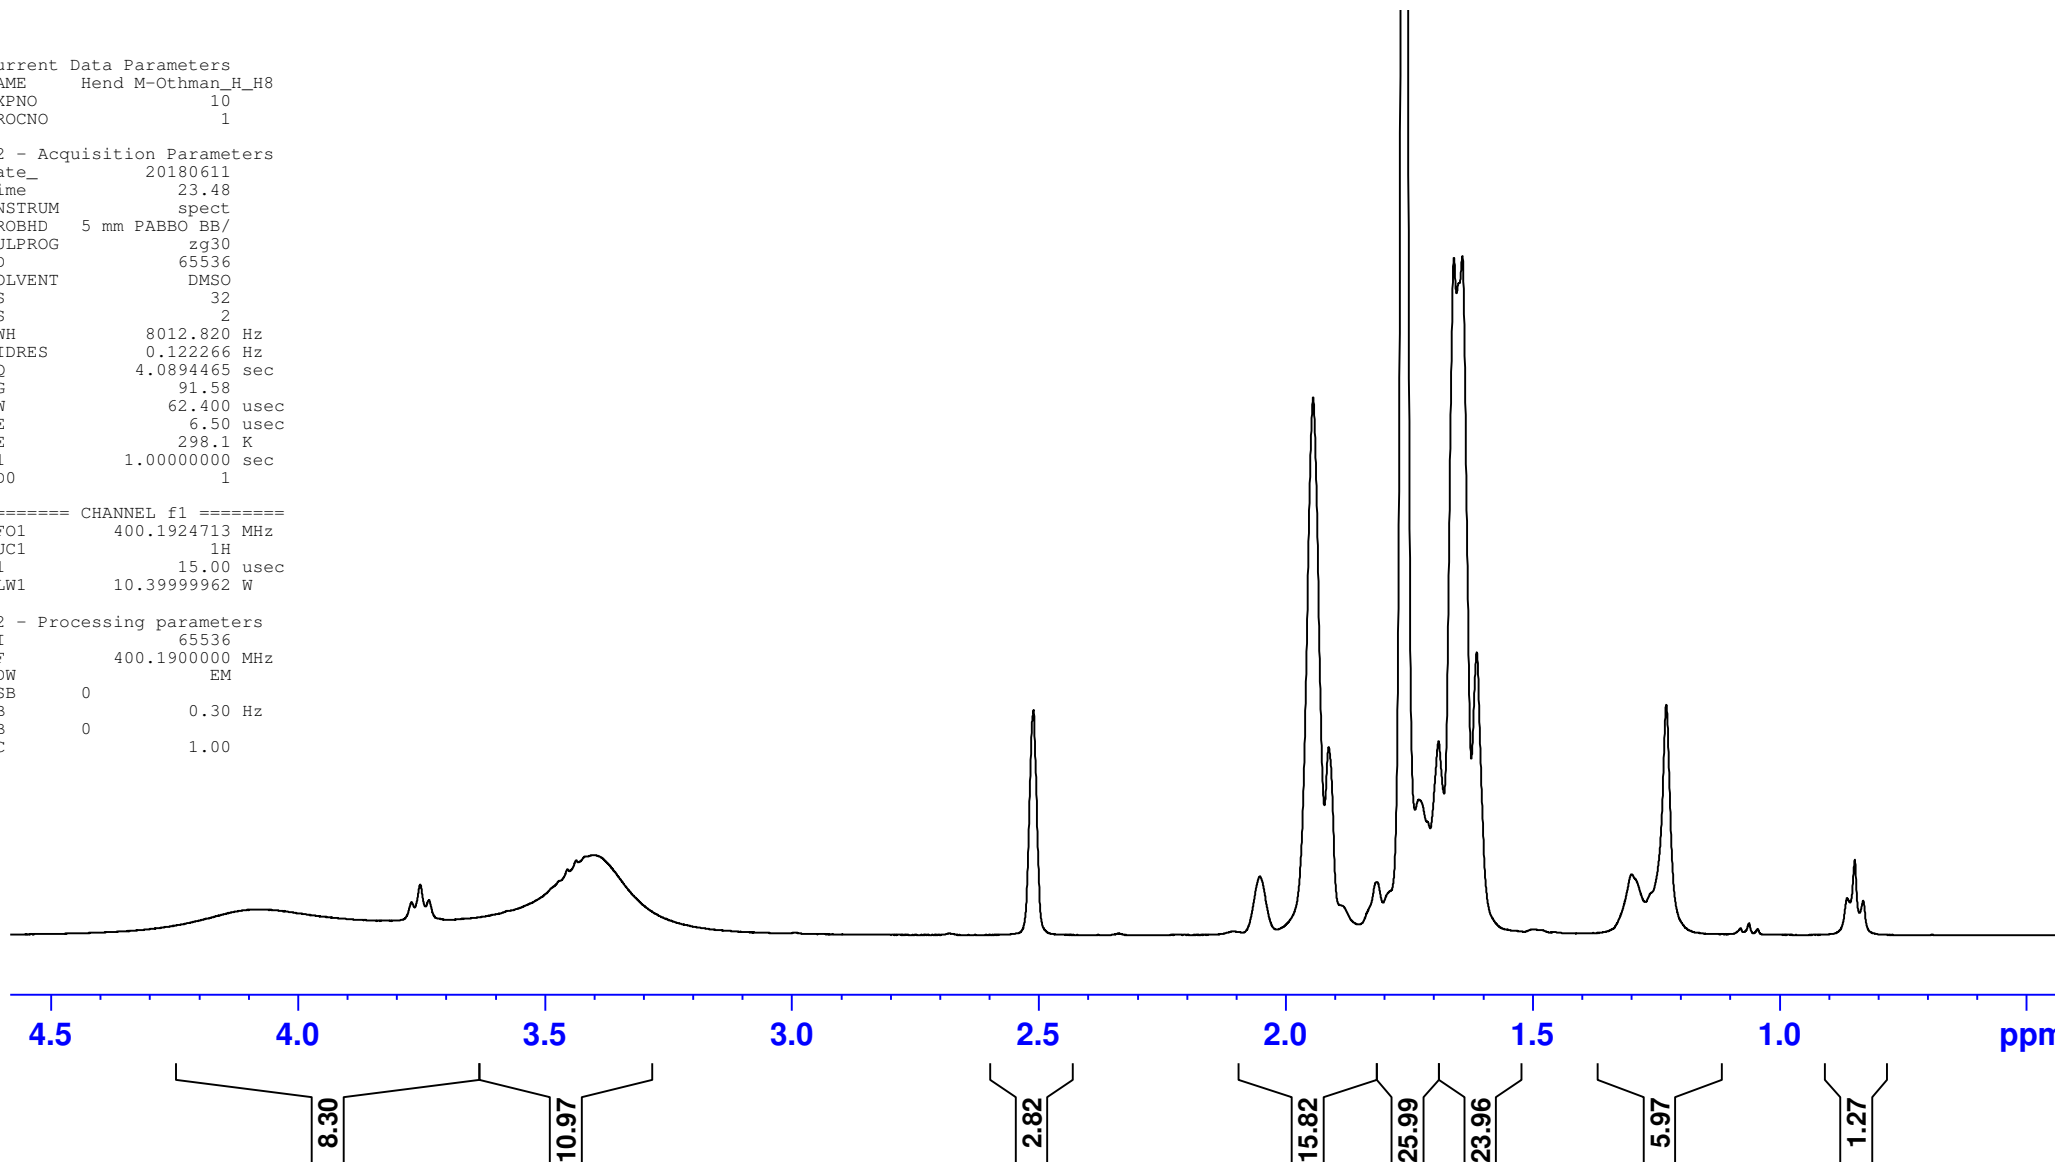

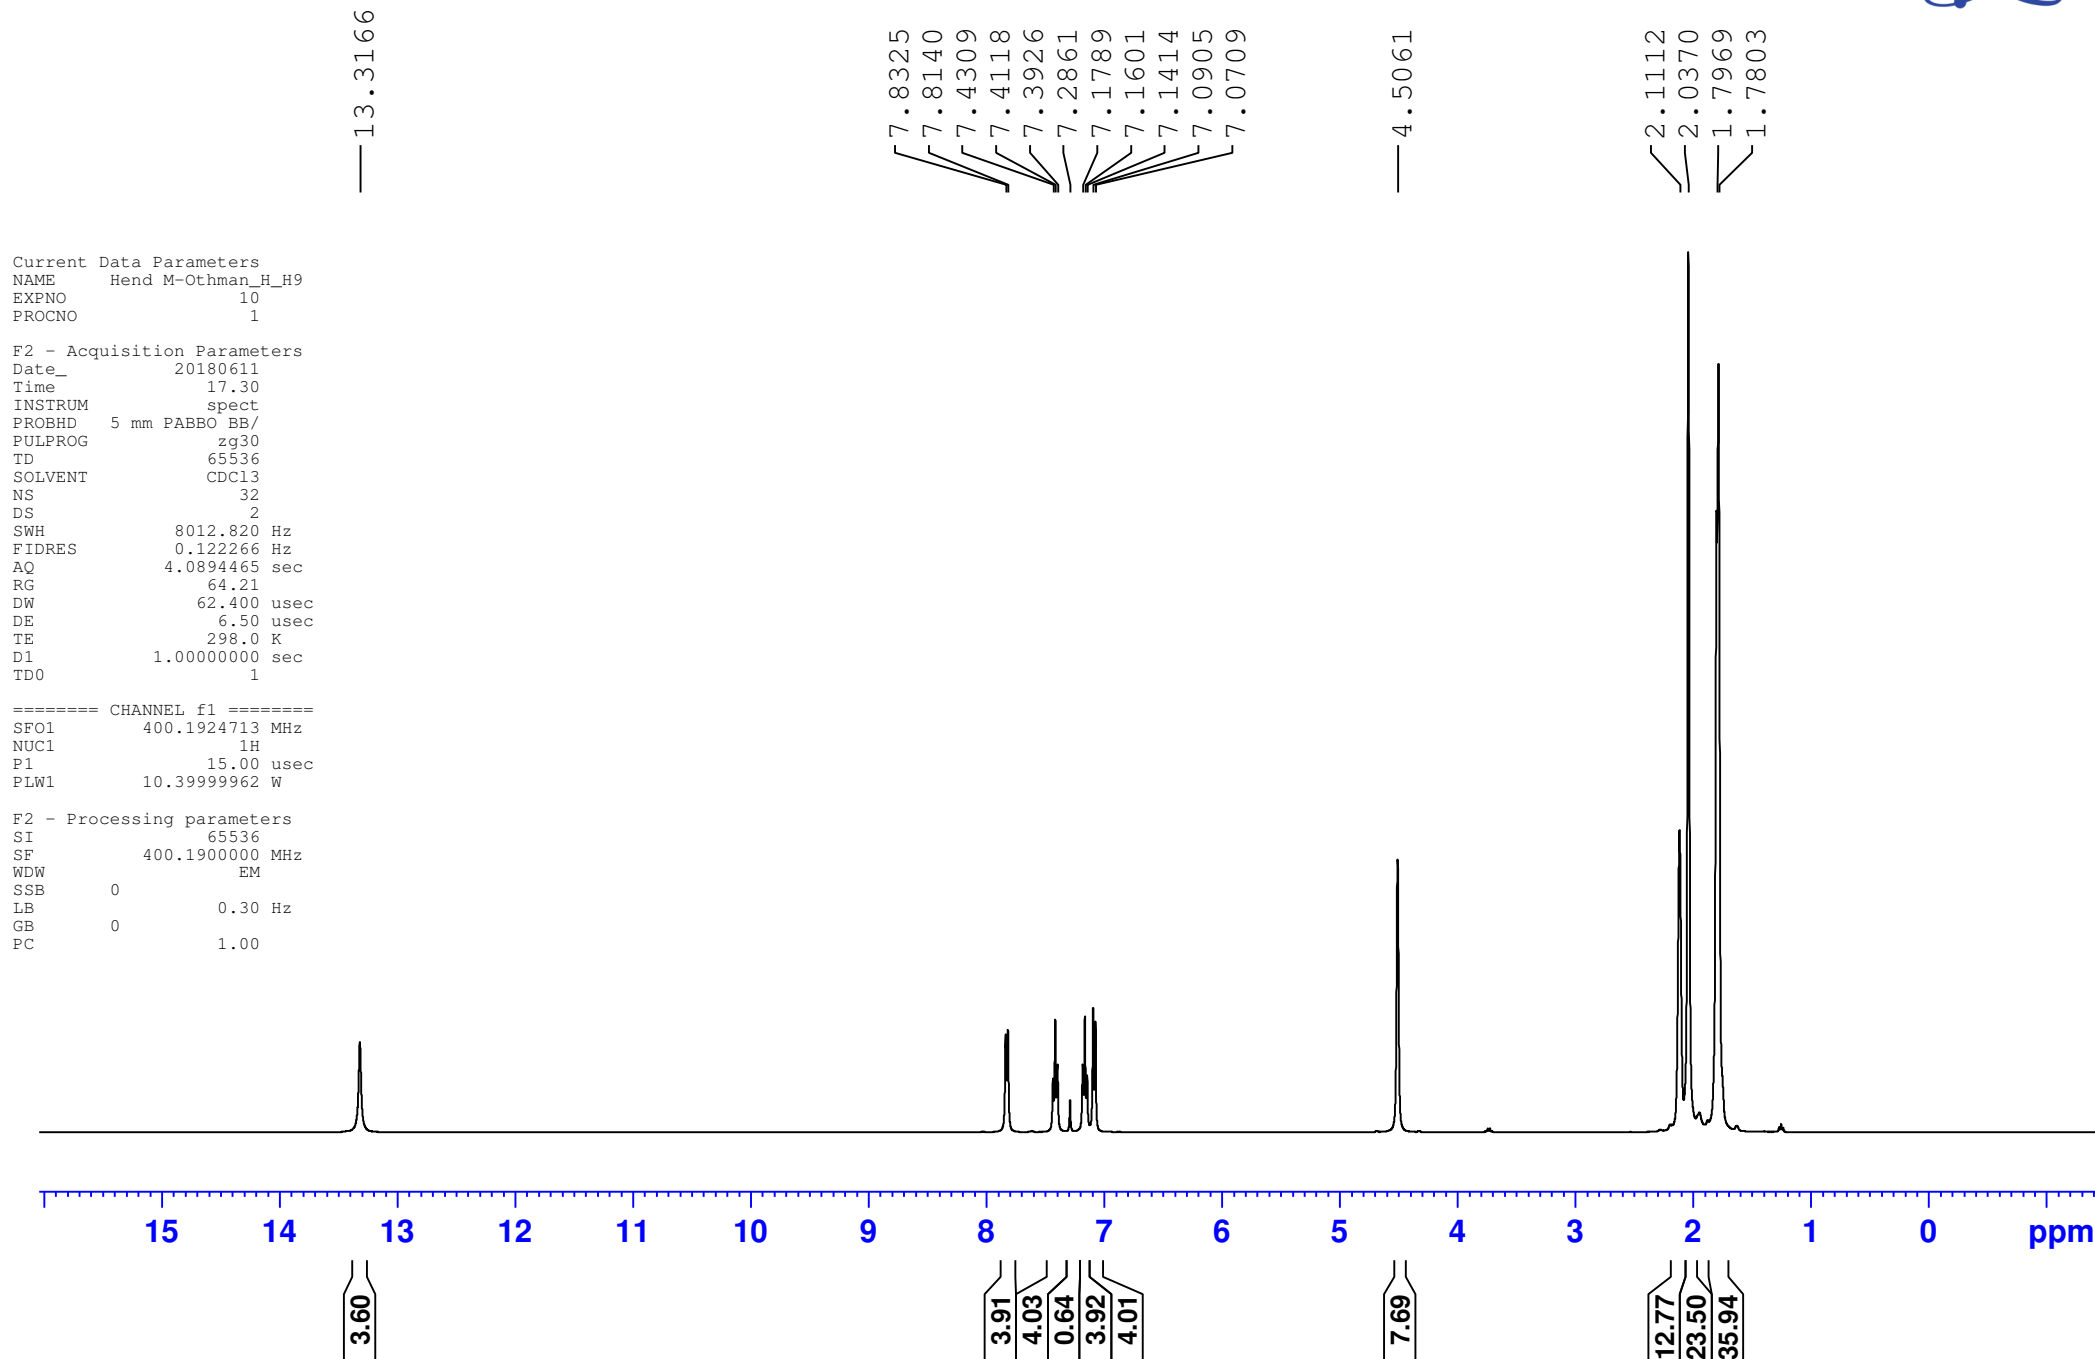

7.8325  
7.8140

7.4309  
7.4118  
7.3926

7.2861

7.1789  
7.1601  
7.1414  
7.0905  
7.0709

Current Data Parameters  
NAME Hend M-Othman\_H\_H9  
EXPNO 10  
PROCNO 1

F2 - Acquisition Parameters  
Date\_ 20180611  
Time 17.30  
INSTRUM spect  
PROBHD 5 mm PABBO BB/  
PULPROG zg30  
TD 65536  
SOLVENT CDCl3  
NS 32  
DS 2  
SWH 8012.820 Hz  
FIDRES 0.122266 Hz  
AQ 4.0894465 sec  
RG 64.21  
DW 62.400 usec  
DE 6.50 usec  
TE 298.0 K  
D1 1.00000000 sec  
TD0 1

===== CHANNEL f1 =====  
SFO1 400.1924713 MHz  
NUC1 1H  
P1 15.00 usec  
PLW1 10.39999962 W

F2 - Processing parameters  
SI 65536  
SF 400.1900000 MHz  
WDW EM  
SSB 0  
LB 0.30 Hz  
GB 0  
PC 1.00

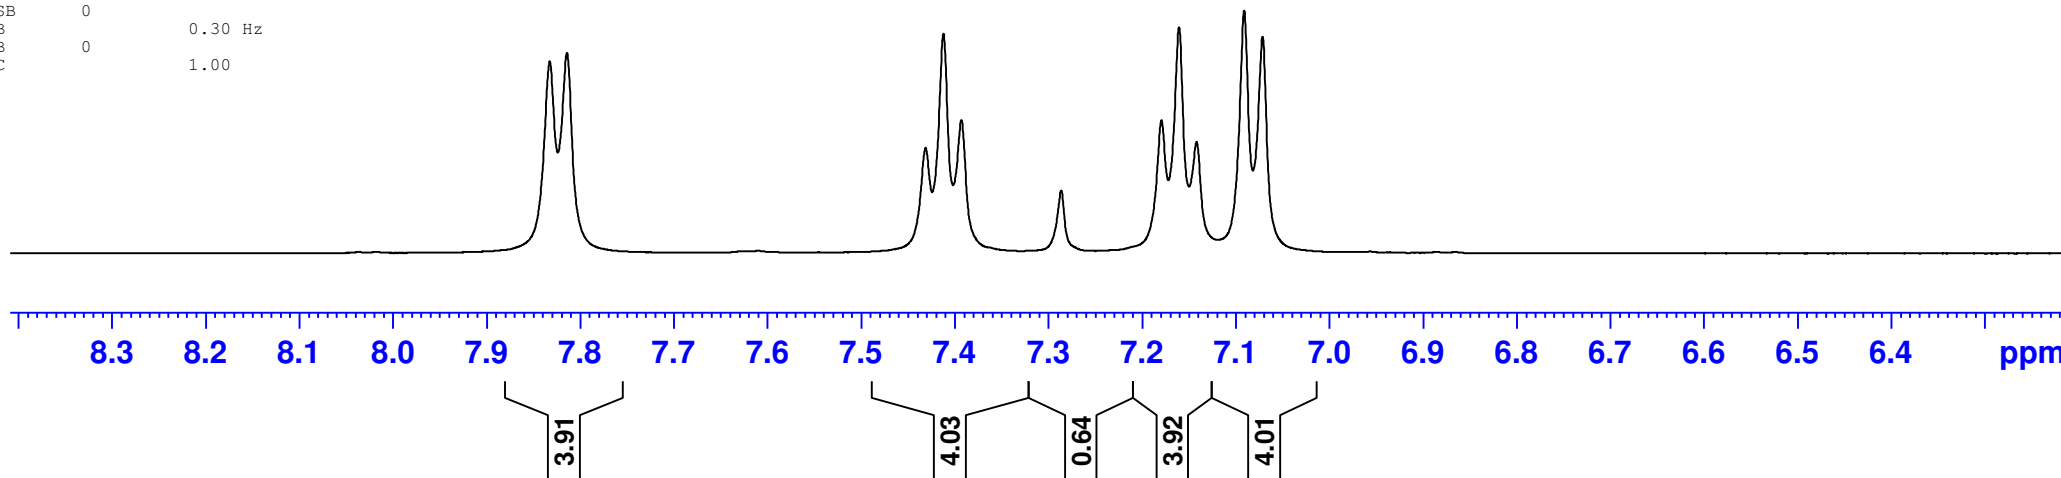

Current Data Parameters  
NAME Hend M-Othman\_H\_H9  
EXPNO 10  
PROCNO 1

F2 - Acquisition Parameters  
Date\_ 20180611  
Time 17.30  
INSTRUM spect  
PROBHD 5 mm PABBO BB/  
PULPROG zg30  
TD 65536  
SOLVENT CDCl3  
NS 32  
DS 2  
SWH 8012.820 Hz  
FIDRES 0.122266 Hz  
AQ 4.0894465 sec  
RG 64.21  
DW 62.400 usec  
DE 6.50 usec  
TE 298.0 K  
D1 1.00000000 sec  
TD0 1

===== CHANNEL f1 =====  
SFO1 400.1924713 MHz  
NUC1 1H  
P1 15.00 usec  
PLW1 10.39999962 W

F2 - Processing parameters  
SI 65536  
SF 400.1900000 MHz  
WDW EM  
SSB 0  
LB 0.30 Hz  
GB 0  
PC 1.00

— 4.5061

— 2.1112

— 2.0370

— 1.7969

— 1.7803

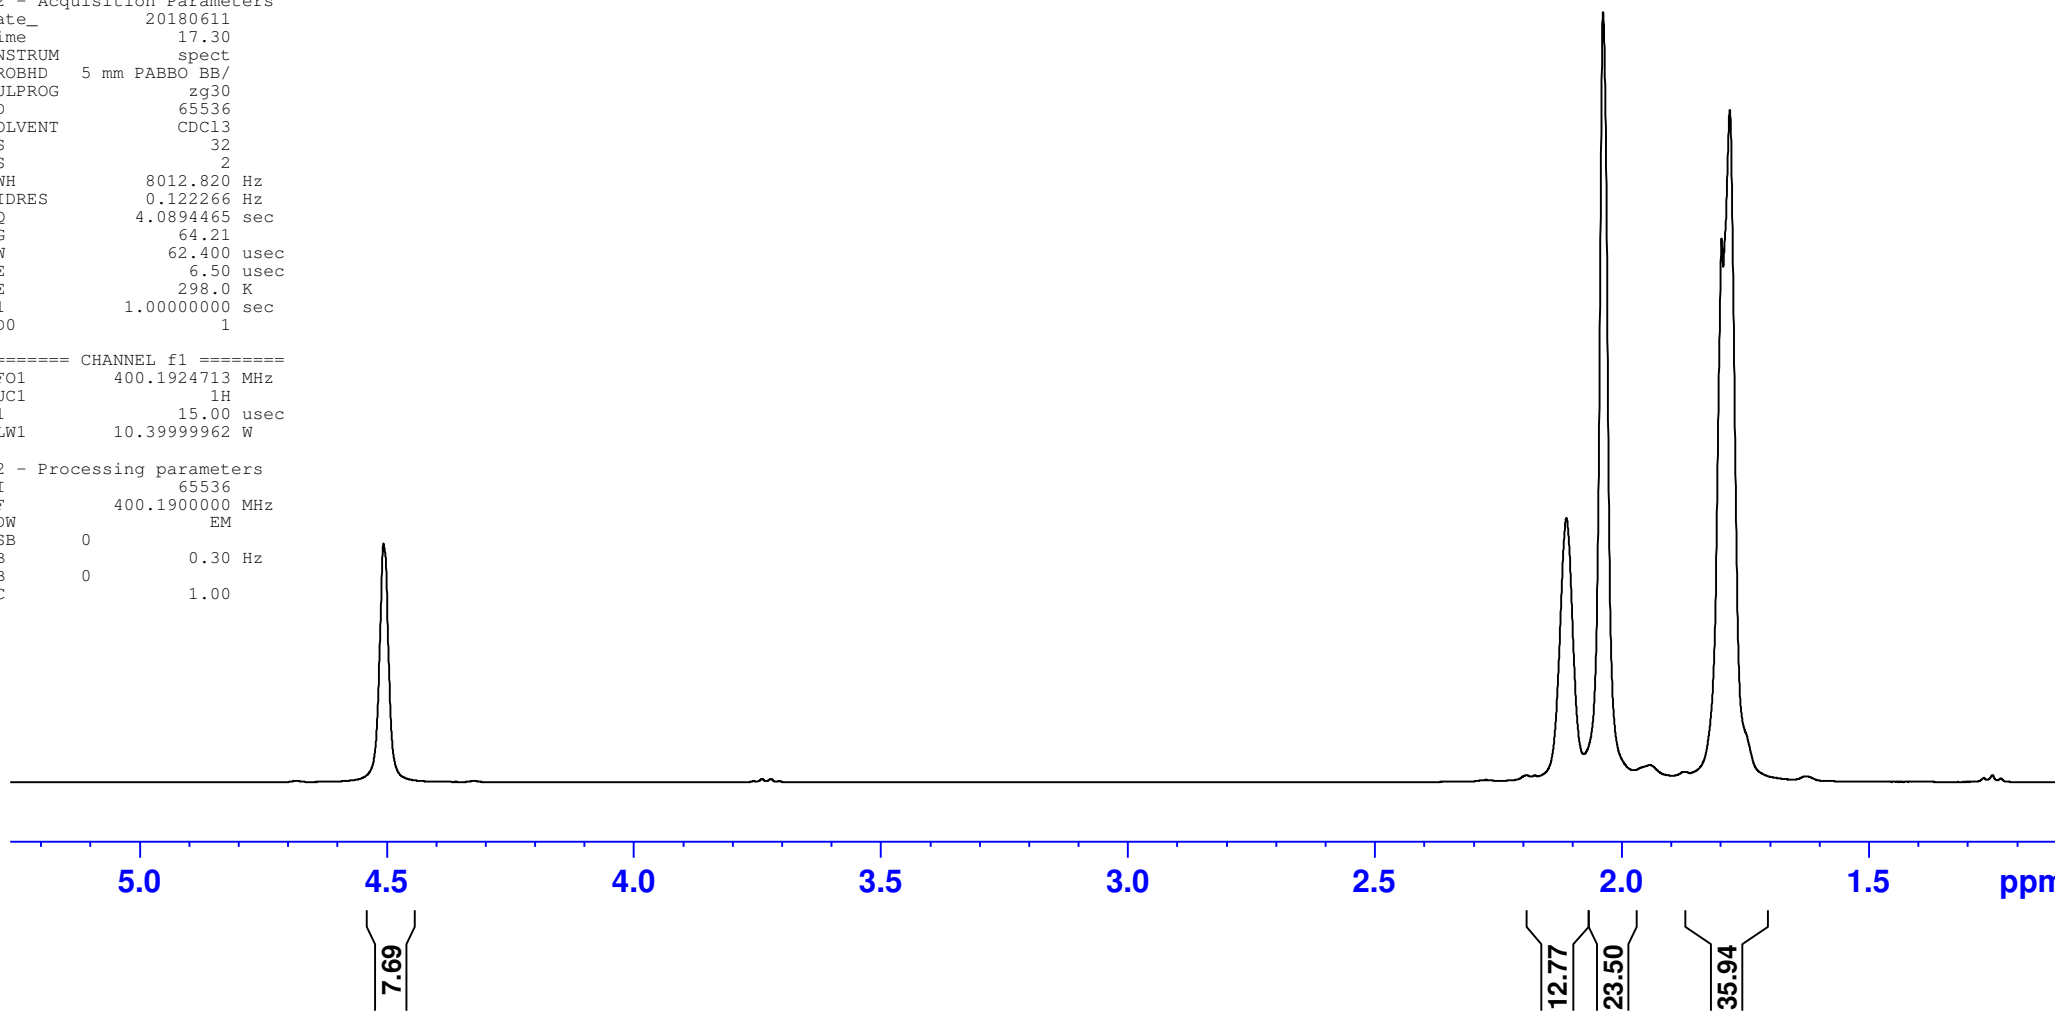

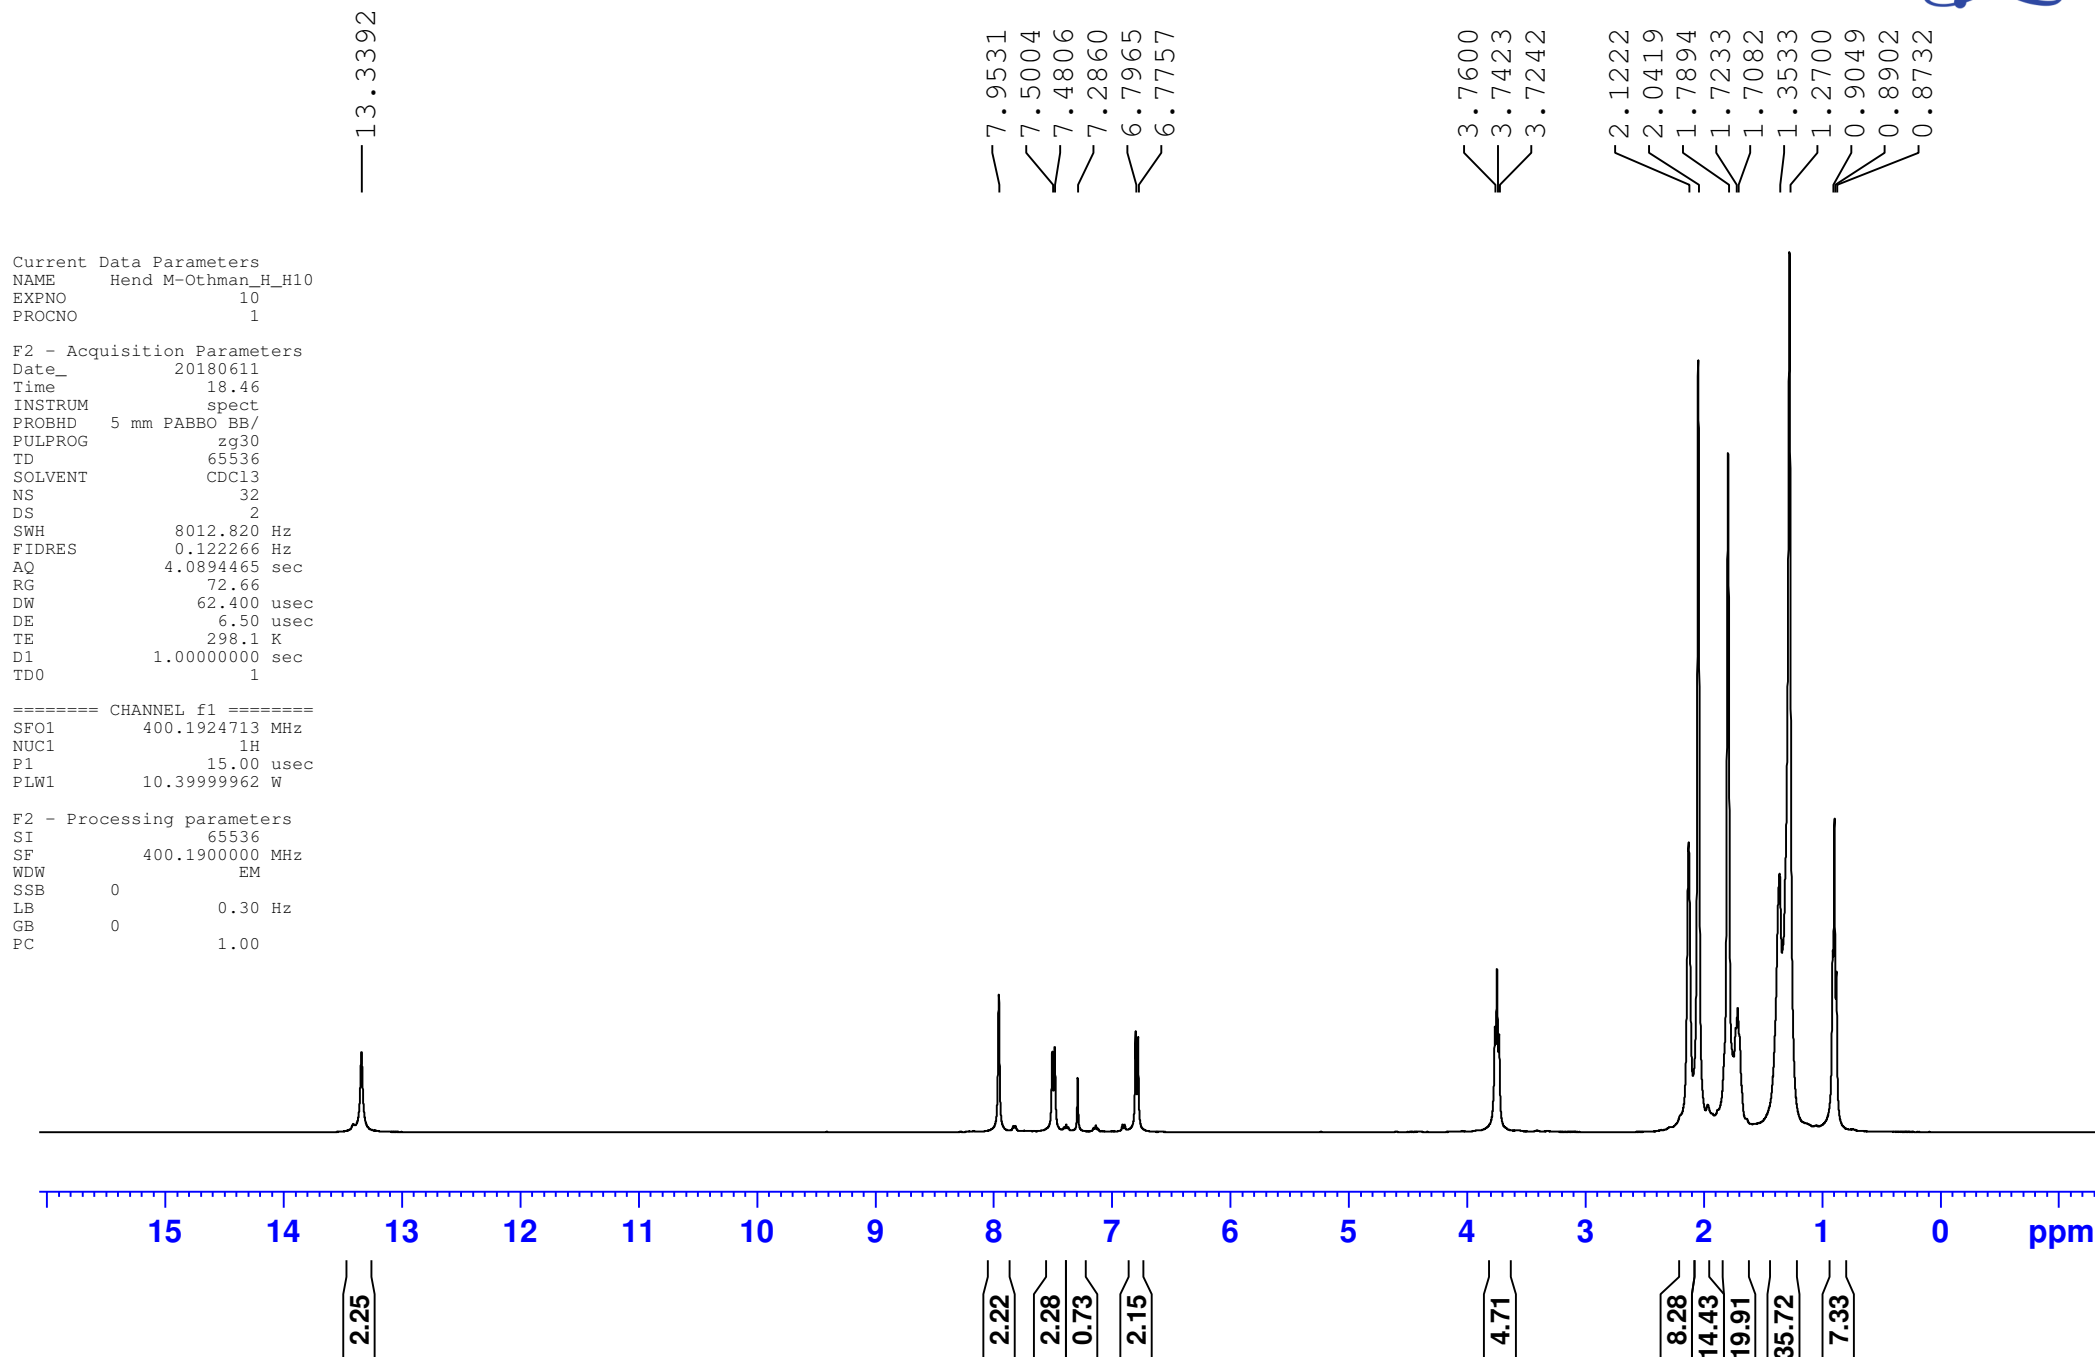

— 7.9531

7.5004  
7.4806

— 7.2860

6.7965  
6.7757

Current Data Parameters  
NAME Hend M-Othman\_H\_H10  
EXPNO 10  
PROCNO 1

F2 - Acquisition Parameters  
Date\_ 20180611  
Time 18.46  
INSTRUM spect  
PROBHD 5 mm PABBO BB/  
PULPROG zg30  
TD 65536  
SOLVENT CDCl3  
NS 32  
DS 2  
SWH 8012.820 Hz  
FIDRES 0.122266 Hz  
AQ 4.0894465 sec  
RG 72.66  
DW 62.400 usec  
DE 6.50 usec  
TE 298.1 K  
D1 1.00000000 sec  
TD0 1

===== CHANNEL f1 =====  
SFO1 400.1924713 MHz  
NUC1 1H  
P1 15.00 usec  
PLW1 10.39999962 W

F2 - Processing parameters  
SI 65536  
SF 400.1900000 MHz  
WDW EM  
SSB 0  
LB 0.30 Hz  
GB 0  
PC 1.00

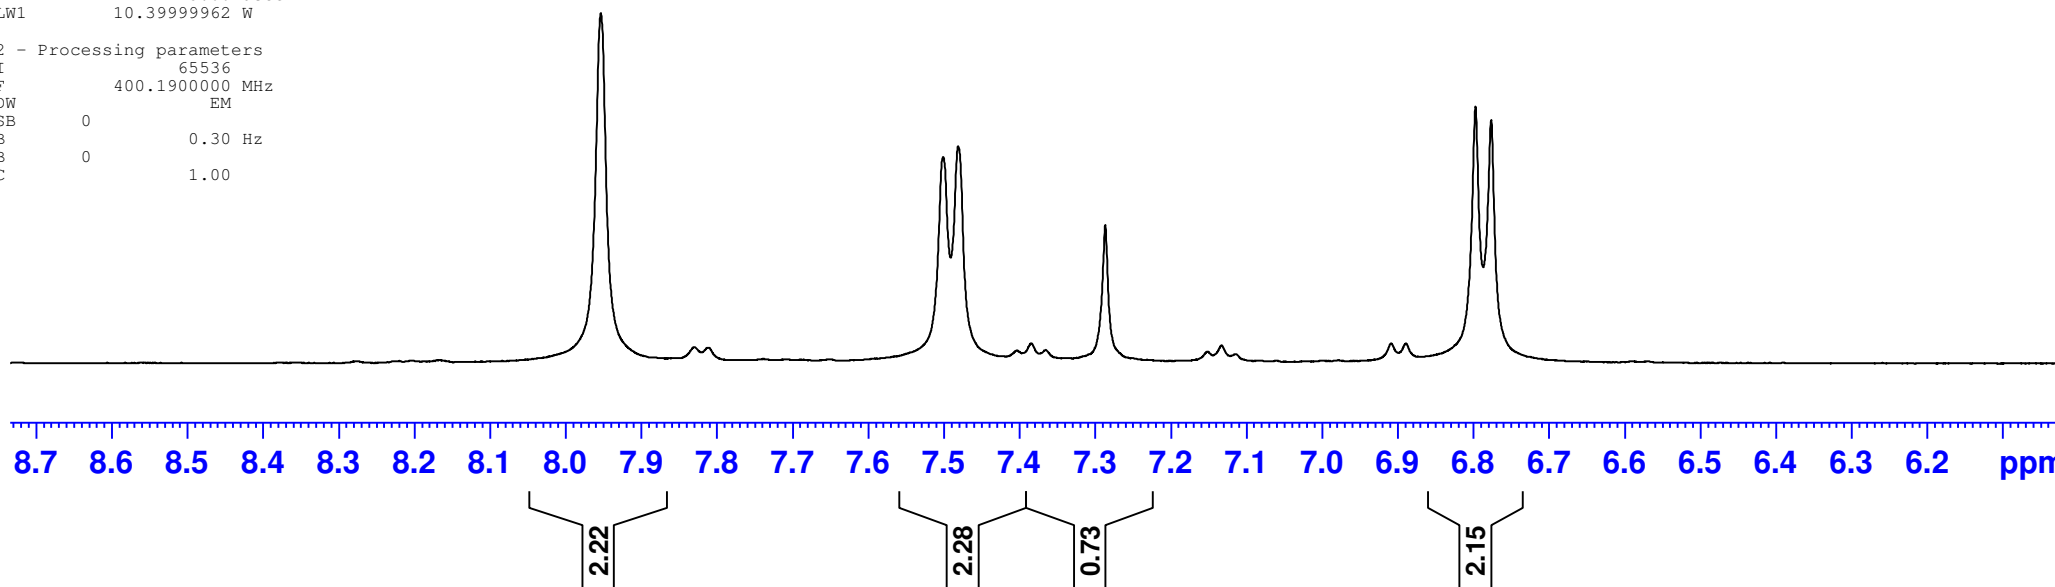

3.7600  
3.7423  
3.7242

2.1222  
2.0419

1.7894  
1.7233  
1.7082

1.3533  
1.2700

0.9049  
0.8902  
0.8732

Current Data Parameters  
NAME Hend M-Othman\_H\_H10  
EXPNO 10  
PROCNO 1

F2 - Acquisition Parameters  
Date\_ 20180611  
Time 18.46  
INSTRUM spect  
PROBHD 5 mm PABBO BB/  
PULPROG zg30  
TD 65536  
SOLVENT CDCl3  
NS 32  
DS 2  
SWH 8012.820 Hz  
FIDRES 0.122266 Hz  
AQ 4.0894465 sec  
RG 72.66  
DW 62.400 usec  
DE 6.50 usec  
TE 298.1 K  
D1 1.00000000 sec  
TD0 1

===== CHANNEL f1 =====  
SFO1 400.1924713 MHz  
NUC1 1H  
P1 15.00 usec  
PLW1 10.39999962 W

F2 - Processing parameters  
SI 65536  
SF 400.1900000 MHz  
WDW EM  
SSB 0  
LB 0.30 Hz  
GB 0  
PC 1.00

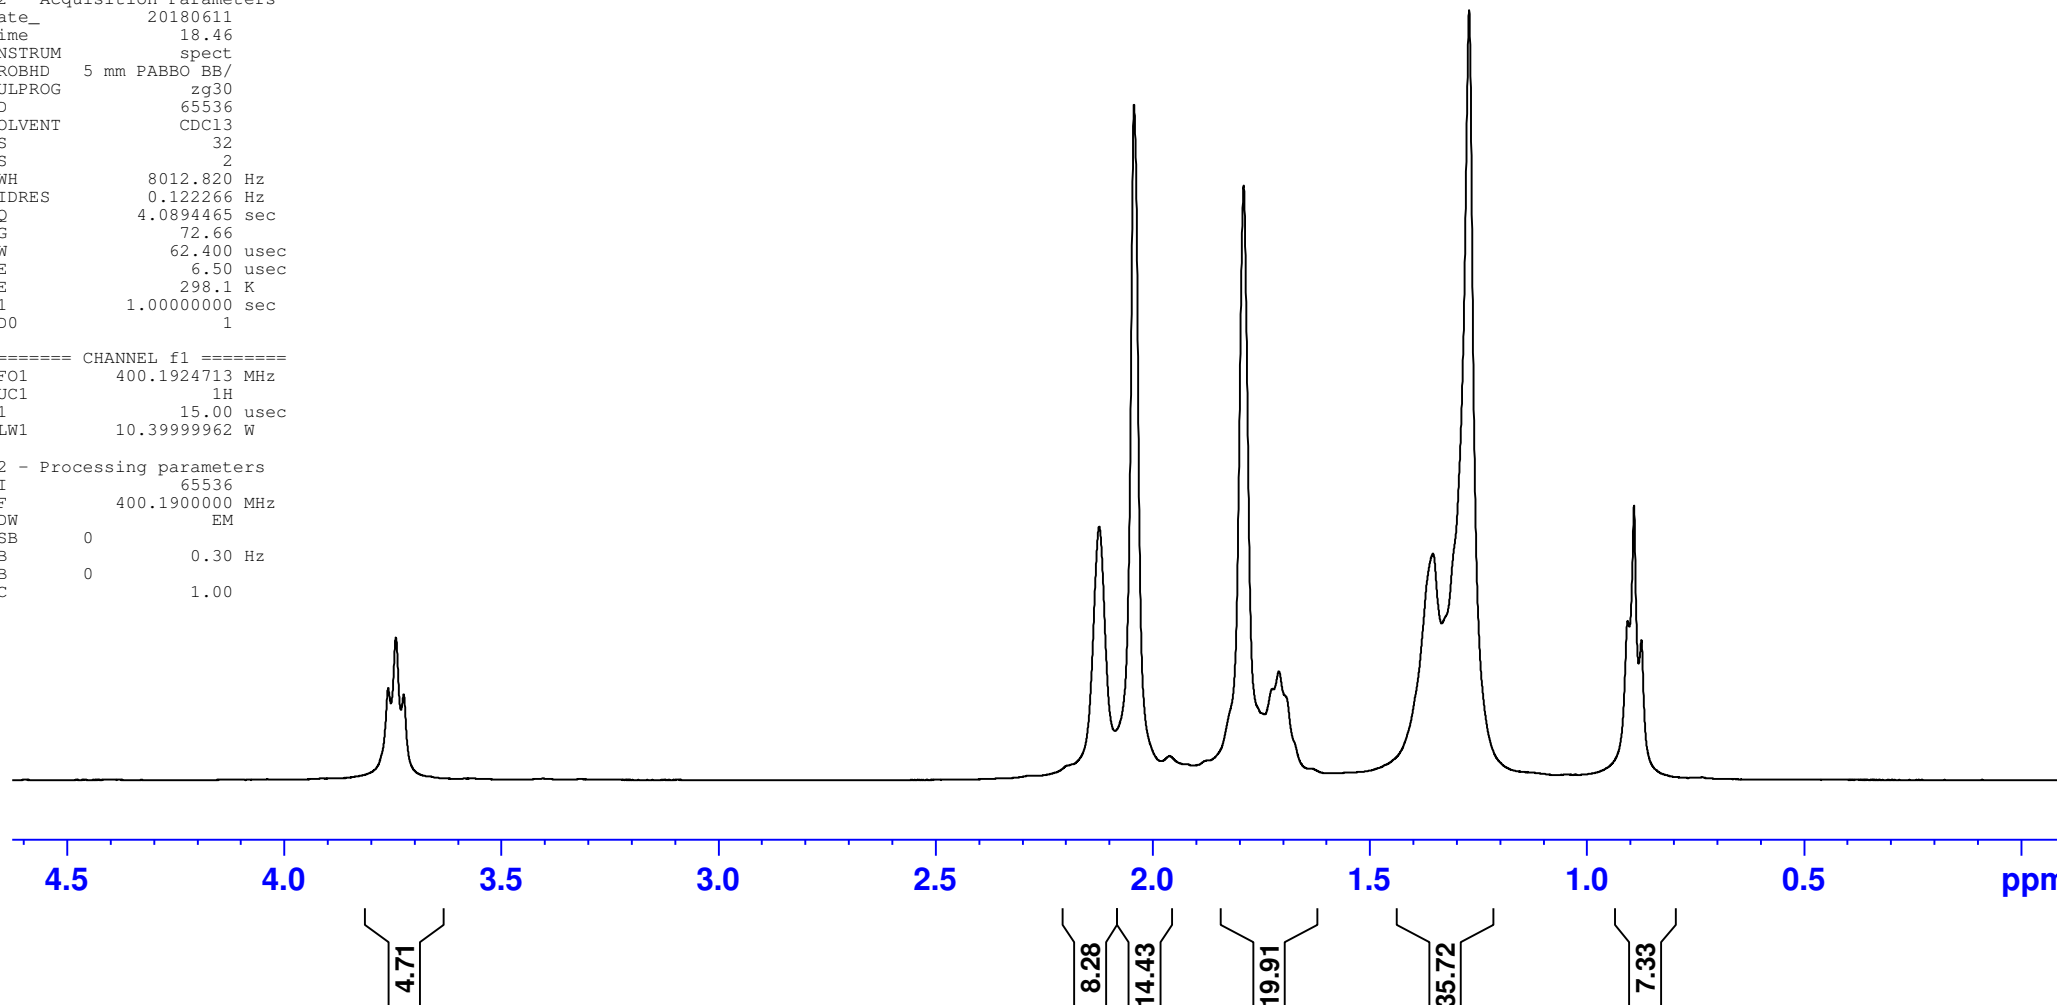

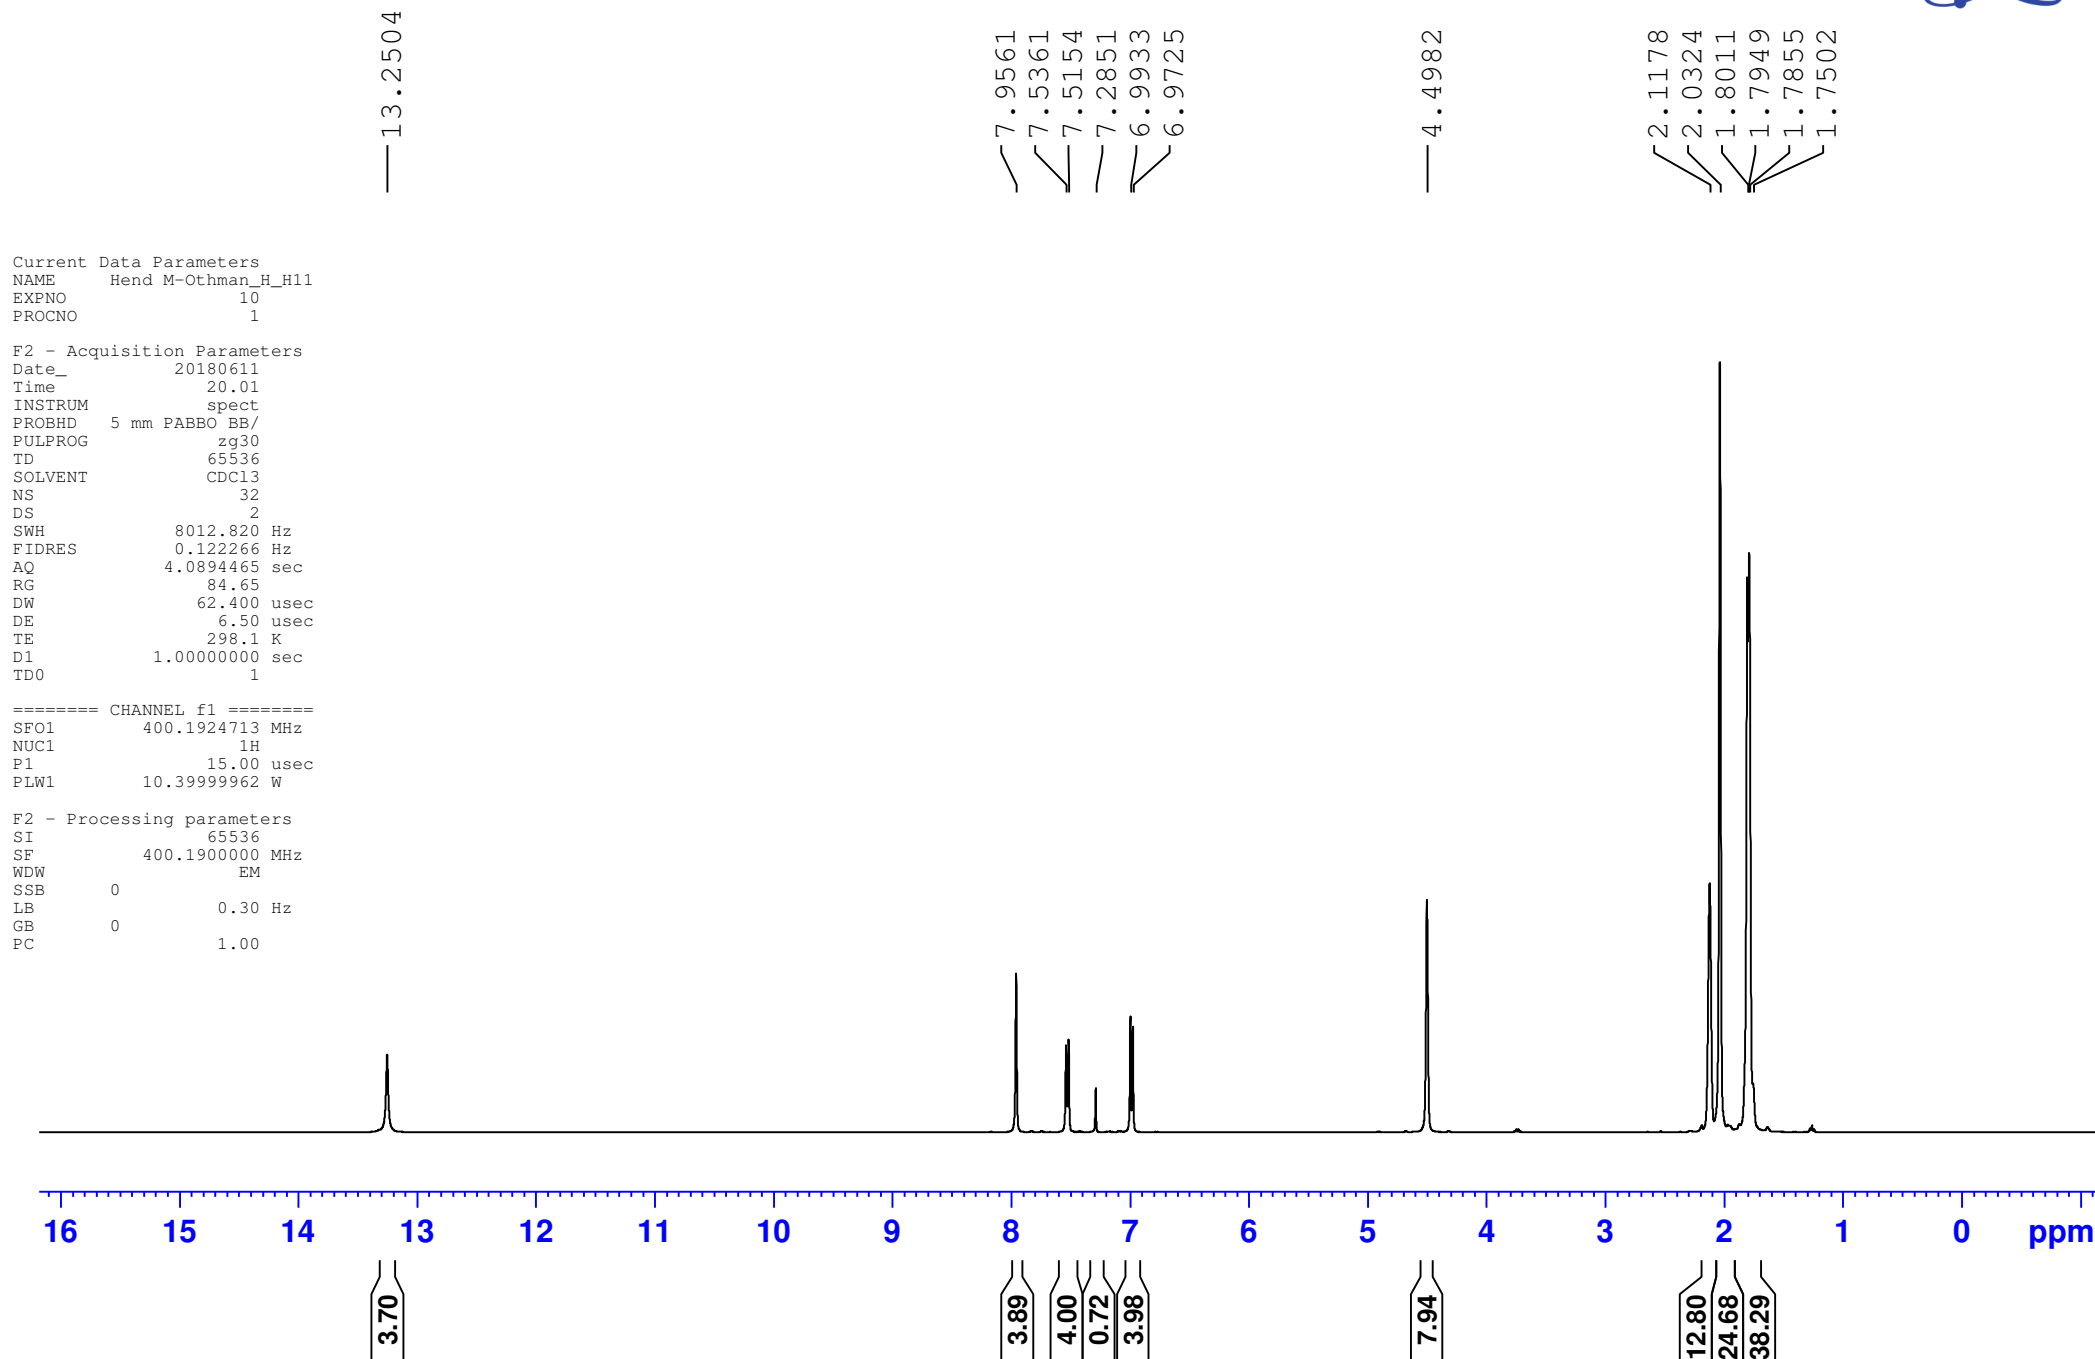

— 7.9561

7.5361  
7.5154

— 7.2851

6.9933  
6.9725

Current Data Parameters  
NAME Hend M-Othman\_H\_H11  
EXPNO 10  
PROCNO 1

F2 - Acquisition Parameters  
Date\_ 20180611  
Time 20.01  
INSTRUM spect  
PROBHD 5 mm PABBO BB/  
PULPROG zg30  
TD 65536  
SOLVENT CDCl3  
NS 32  
DS 2  
SWH 8012.820 Hz  
FIDRES 0.122266 Hz  
AQ 4.0894465 sec  
RG 84.65  
DW 62.400 usec  
DE 6.50 usec  
TE 298.1 K  
D1 1.00000000 sec  
TD0 1

===== CHANNEL f1 =====  
SFO1 400.1924713 MHz  
NUC1 1H  
P1 15.00 usec  
PLW1 10.39999962 W

F2 - Processing parameters  
SI 65536  
SF 400.1900000 MHz  
WDW EM  
SSB 0  
LB 0.30 Hz  
GB 0  
PC 1.00

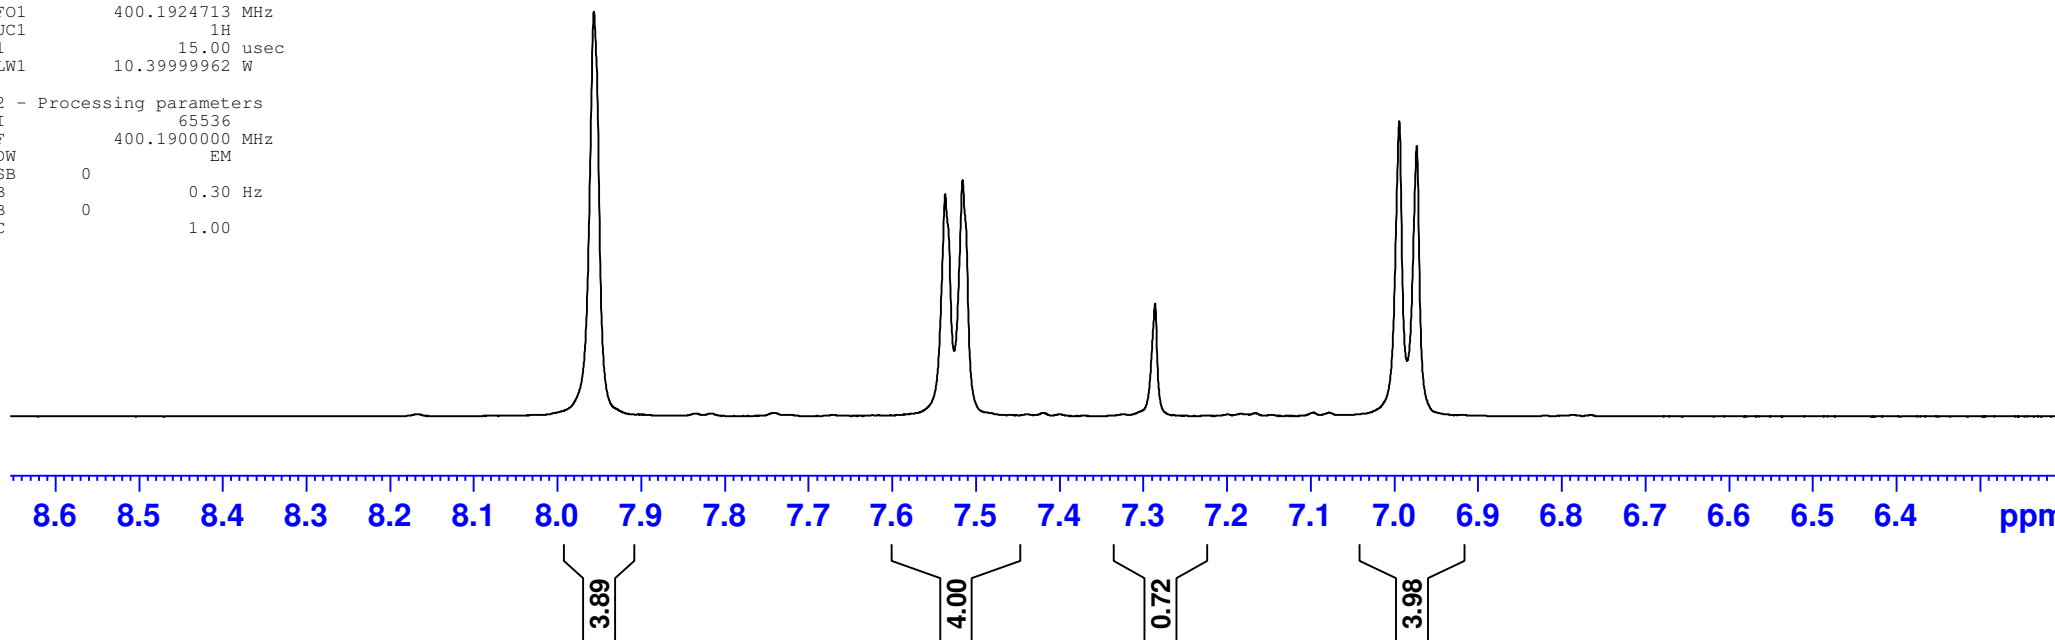

— 4.4982

— 2.1178

— 2.0324

1.8011

1.7949

1.7855

1.7502

Current Data Parameters  
NAME Hend M-Othman\_H\_H11  
EXPNO 10  
PROCNO 1

F2 - Acquisition Parameters  
Date\_ 20180611  
Time 20.01  
INSTRUM spect  
PROBHD 5 mm PABBO BB/  
PULPROG zg30  
TD 65536  
SOLVENT CDCl3  
NS 32  
DS 2  
SWH 8012.820 Hz  
FIDRES 0.122266 Hz  
AQ 4.0894465 sec  
RG 84.65  
DW 62.400 usec  
DE 6.50 usec  
TE 298.1 K  
D1 1.00000000 sec  
TD0 1

===== CHANNEL f1 =====  
SFO1 400.1924713 MHz  
NUC1 1H  
P1 15.00 usec  
PLW1 10.39999962 W

F2 - Processing parameters  
SI 65536  
SF 400.1900000 MHz  
WDW EM  
SSB 0  
LB 0.30 Hz  
GB 0  
PC 1.00

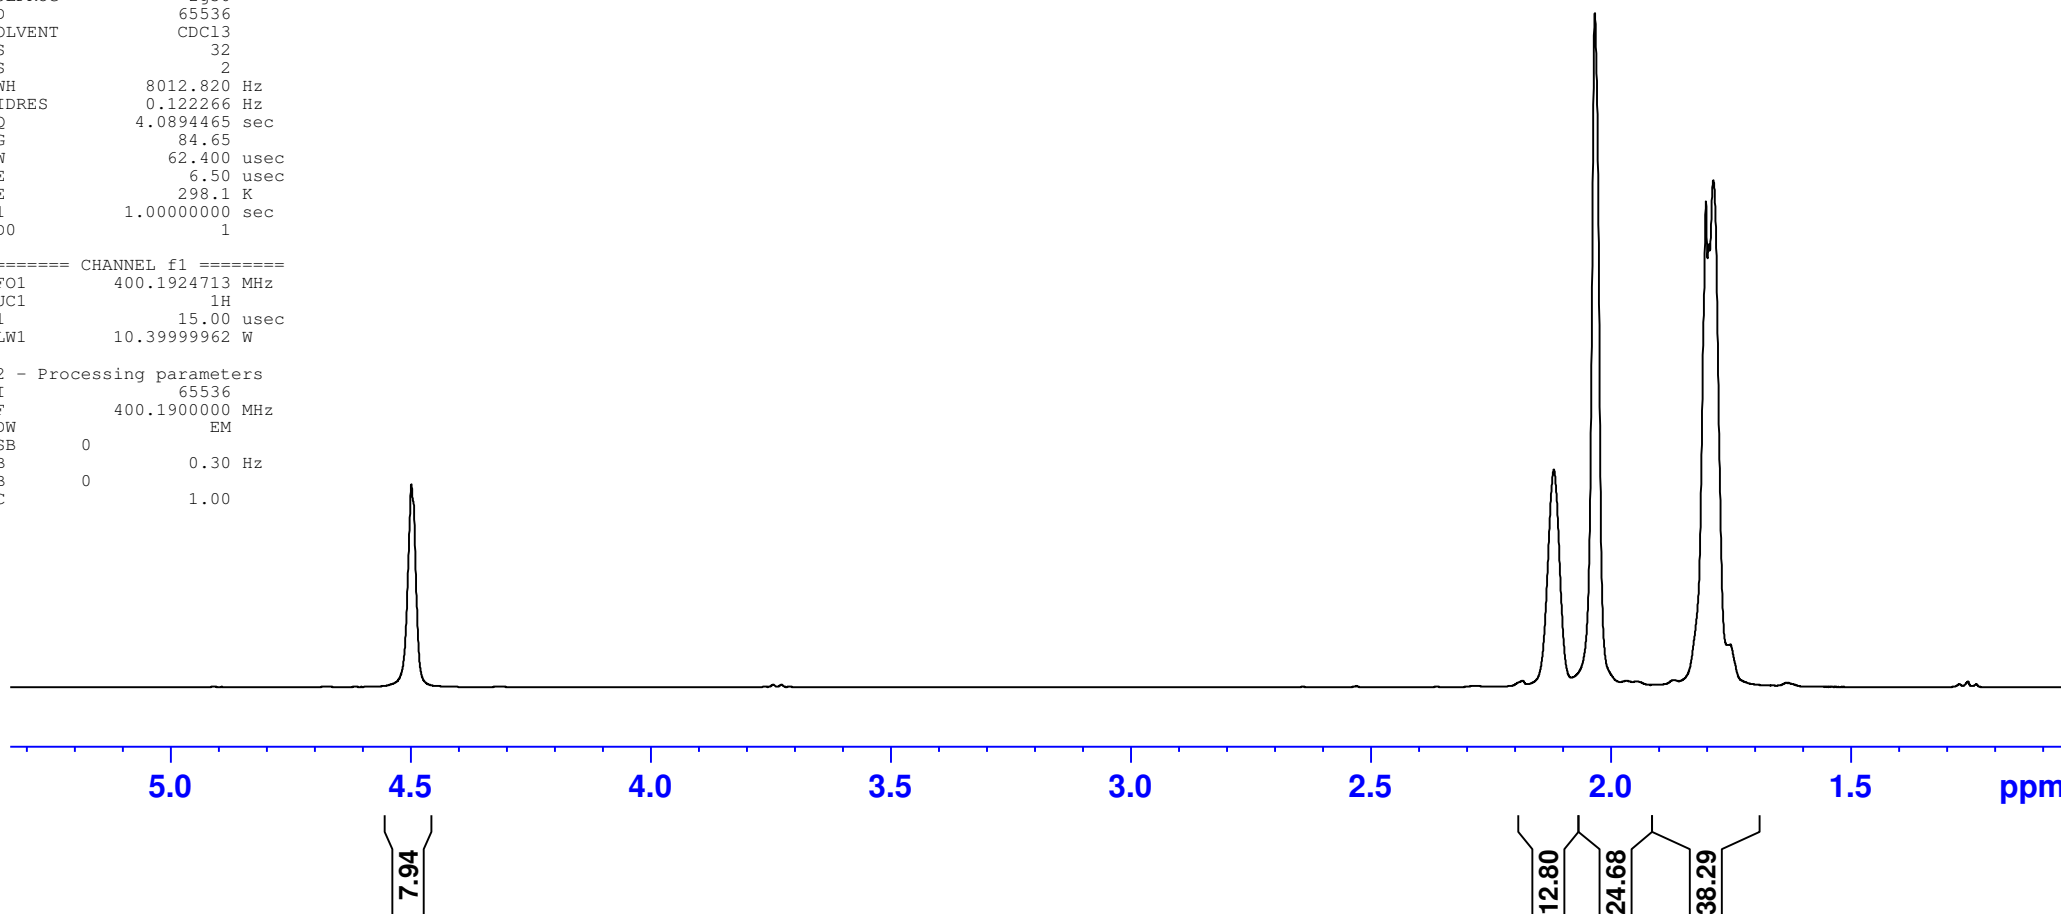

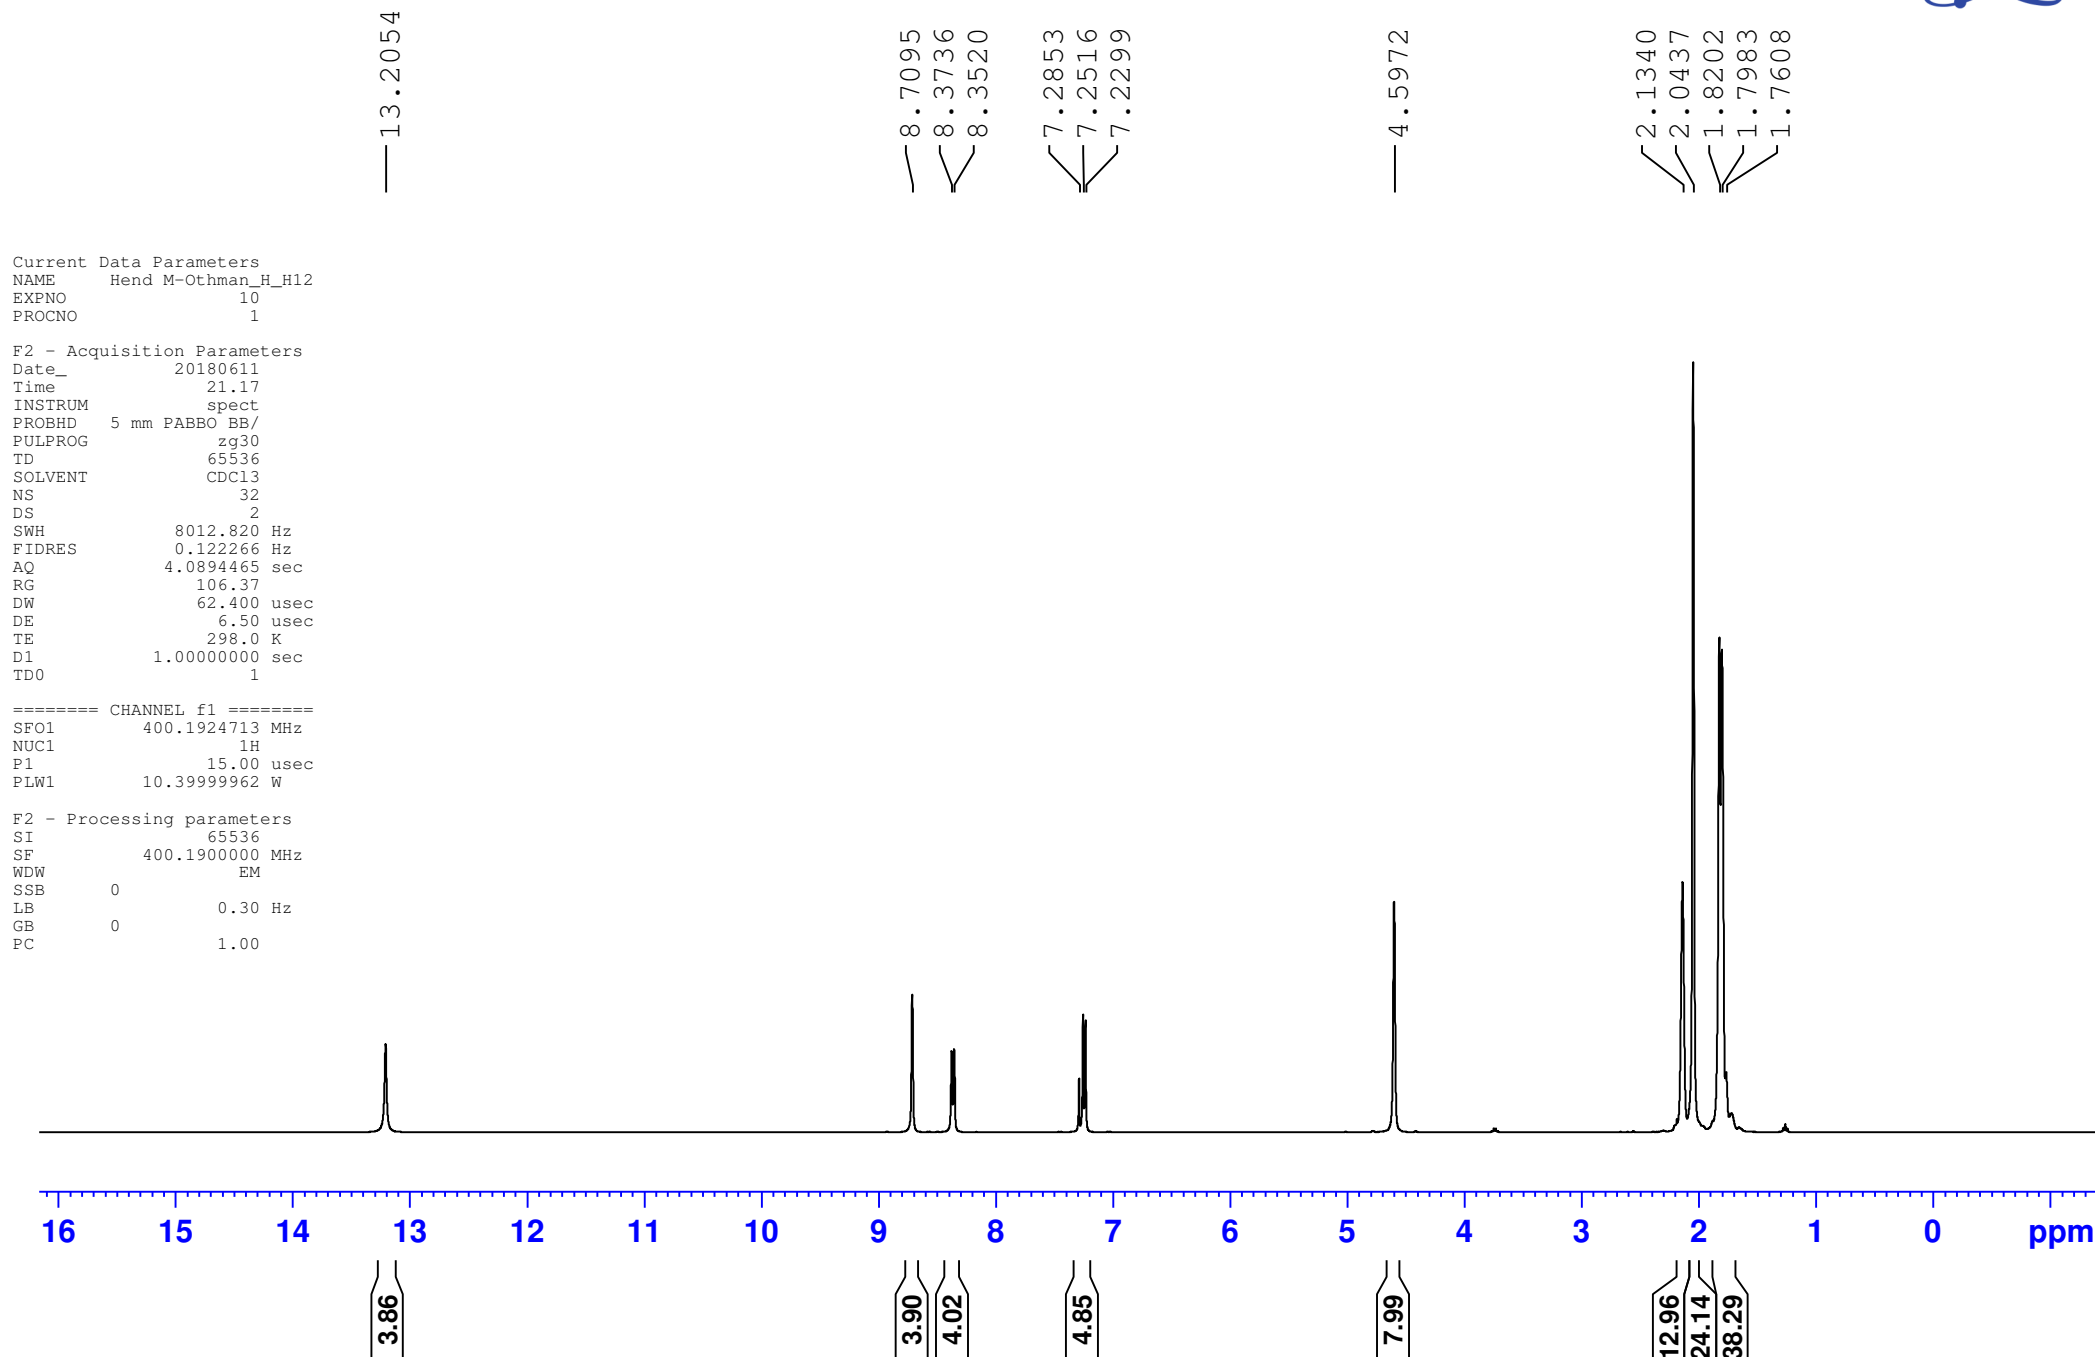

— 8.7095

\ 8.3736  
/ 8.3520\ 7.2853  
/ 7.2516  
/ 7.2299

Current Data Parameters  
NAME Hend M-Othman\_H\_H12  
EXPNO 10  
PROCNO 1

F2 - Acquisition Parameters  
Date\_ 20180611  
Time 21.17  
INSTRUM spect  
PROBHD 5 mm PABBO BB/  
PULPROG zg30  
TD 65536  
SOLVENT CDCl3  
NS 32  
DS 2  
SWH 8012.820 Hz  
FIDRES 0.122266 Hz  
AQ 4.0894465 sec  
RG 106.37  
DW 62.400 usec  
DE 6.50 usec  
TE 298.0 K  
D1 1.00000000 sec  
TD0 1

===== CHANNEL f1 =====  
SFO1 400.1924713 MHz  
NUC1 1H  
P1 15.00 usec  
PLW1 10.39999962 W

F2 - Processing parameters  
SI 65536  
SF 400.1900000 MHz  
WDW EM  
SSB 0  
LB 0.30 Hz  
GB 0  
PC 1.00

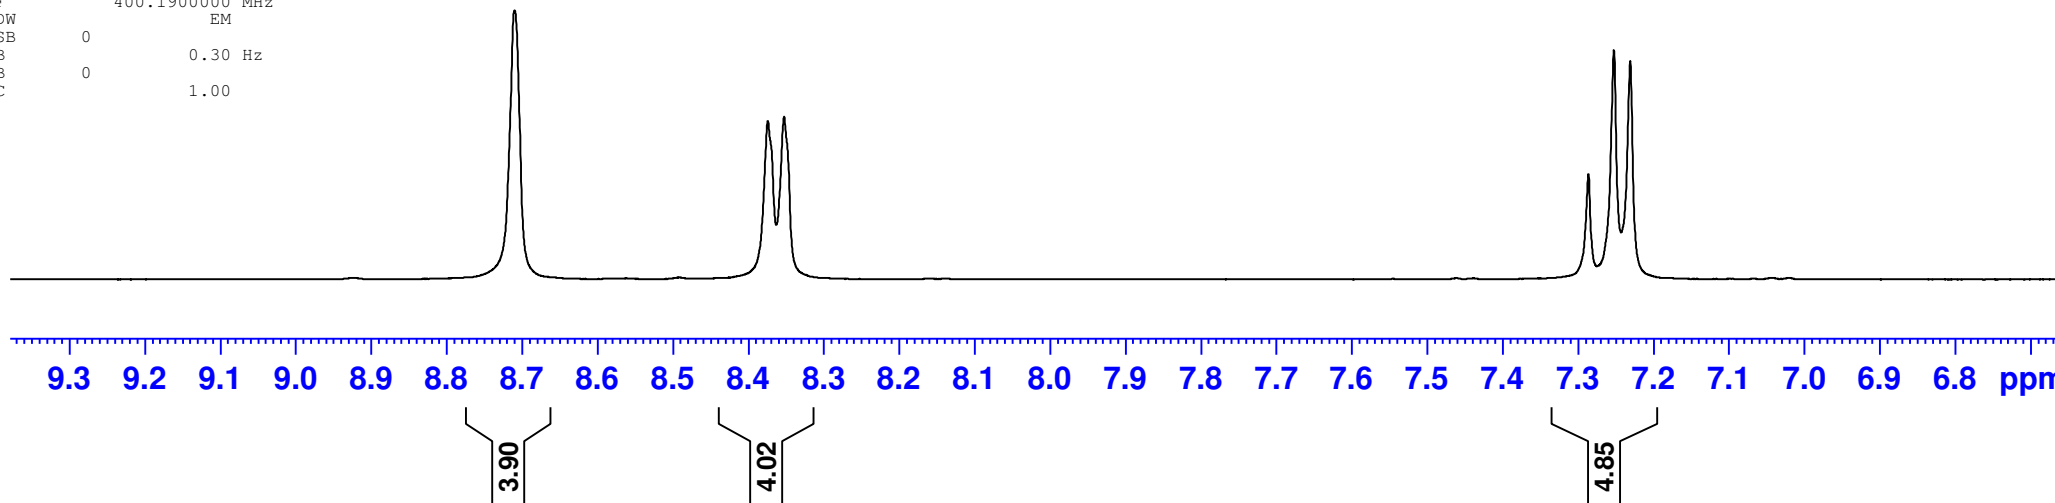

Current Data Parameters  
NAME Hend M-Othman\_H\_H12  
EXPNO 10  
PROCNO 1

F2 - Acquisition Parameters  
Date\_ 20180611  
Time 21.17  
INSTRUM spect  
PROBHD 5 mm PABBO BB/  
PULPROG zg30  
TD 65536  
SOLVENT CDCl3  
NS 32  
DS 2  
SWH 8012.820 Hz  
FIDRES 0.122266 Hz  
AQ 4.0894465 sec  
RG 106.37  
DW 62.400 usec  
DE 6.50 usec  
TE 298.0 K  
D1 1.00000000 sec  
TD0 1

===== CHANNEL f1 =====  
SFO1 400.1924713 MHz  
NUC1 1H  
P1 15.00 usec  
PLW1 10.39999962 W

F2 - Processing parameters  
SI 65536  
SF 400.1900000 MHz  
WDW EM  
SSB 0  
LB 0.30 Hz  
GB 0  
PC 1.00

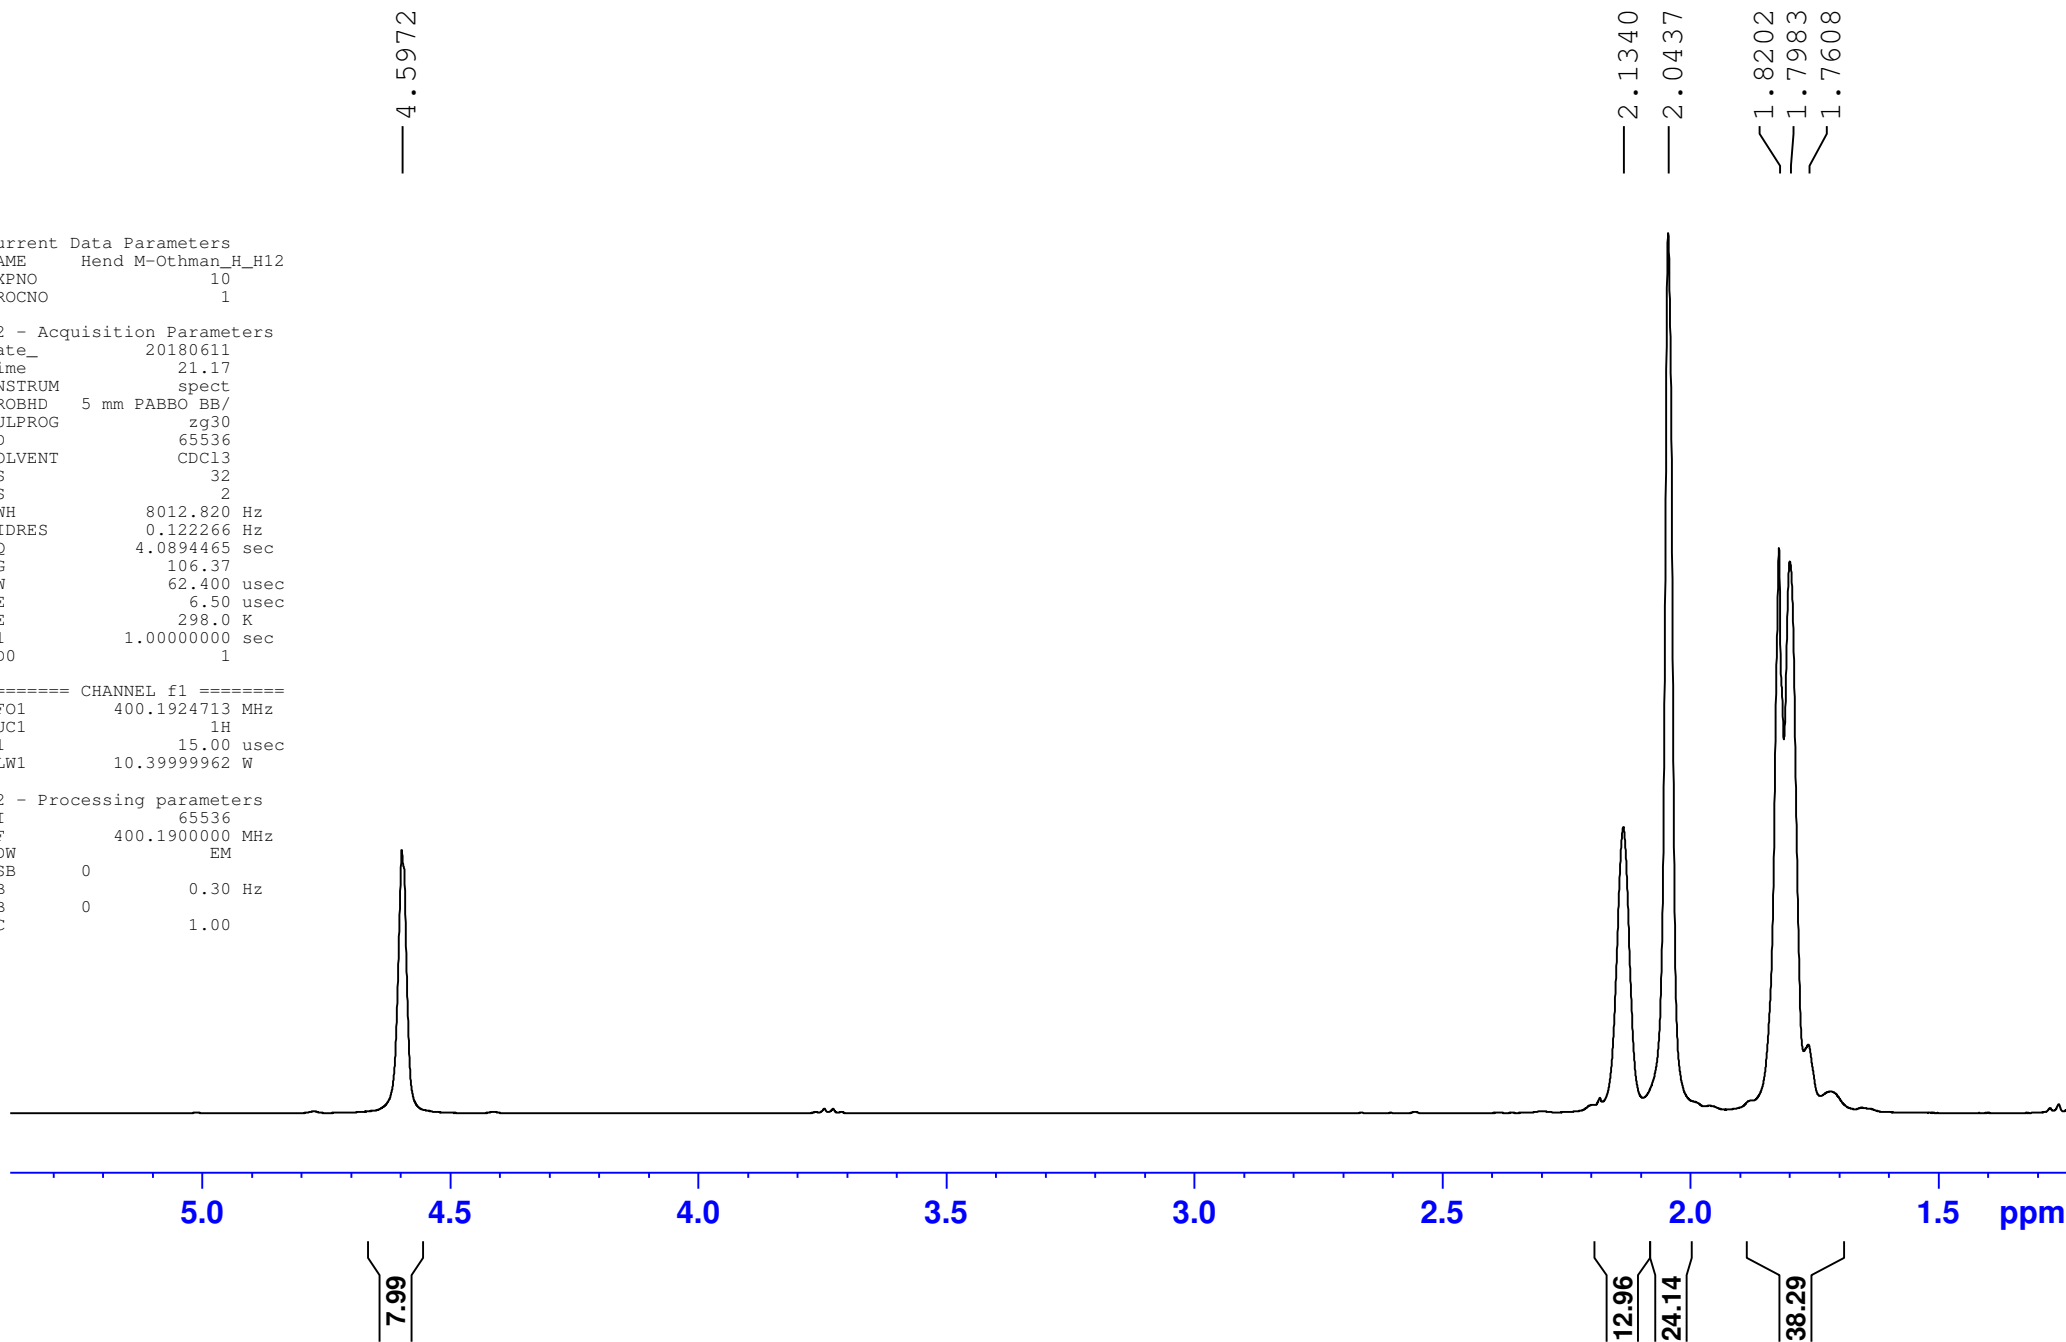

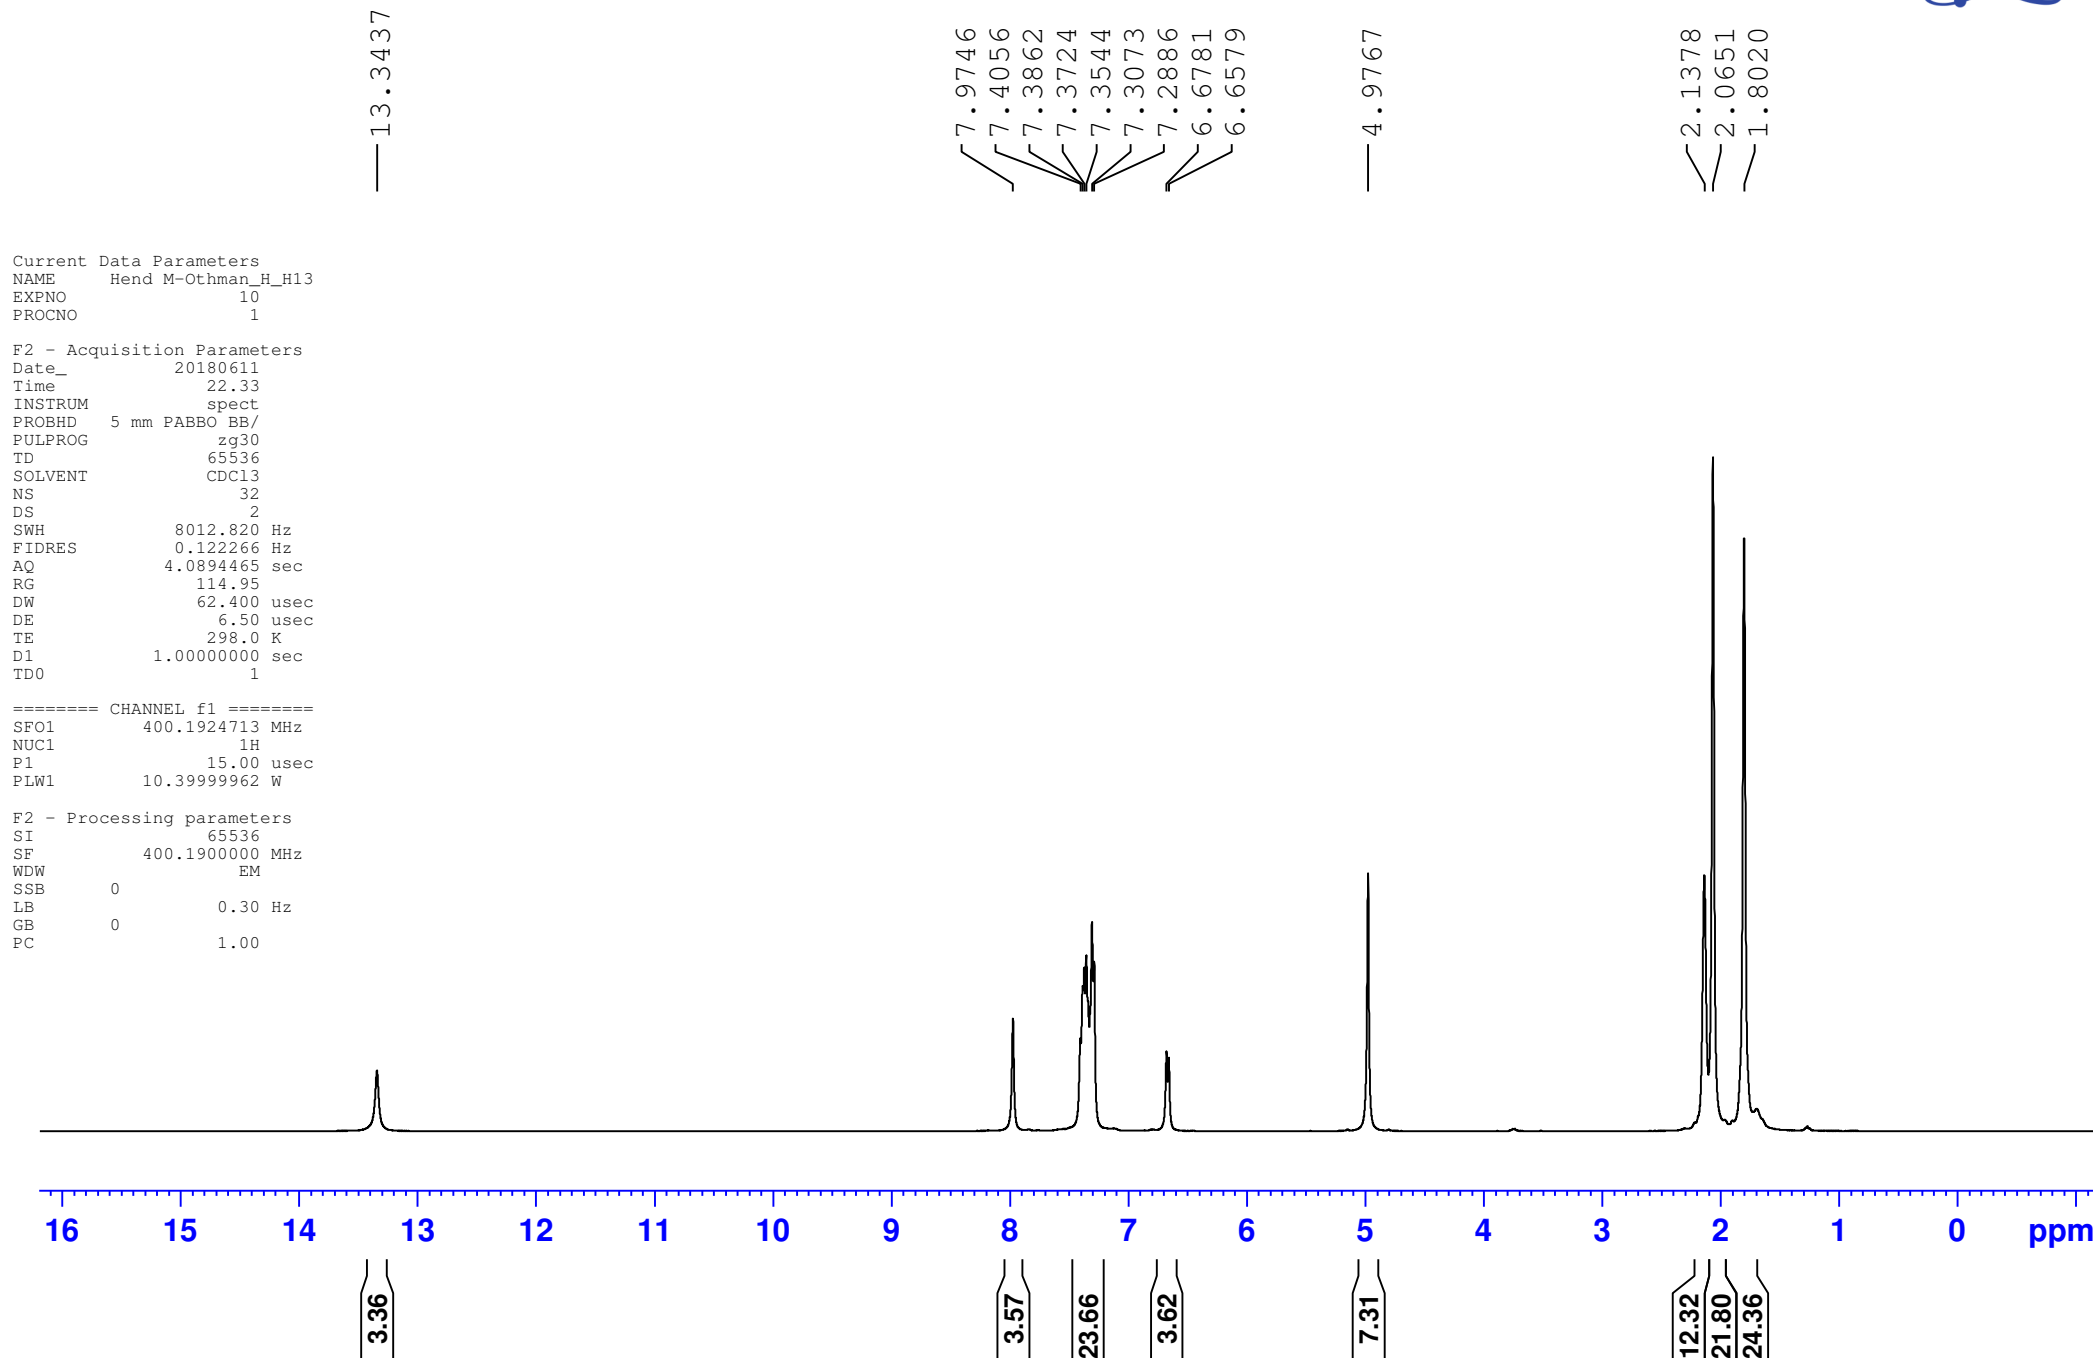

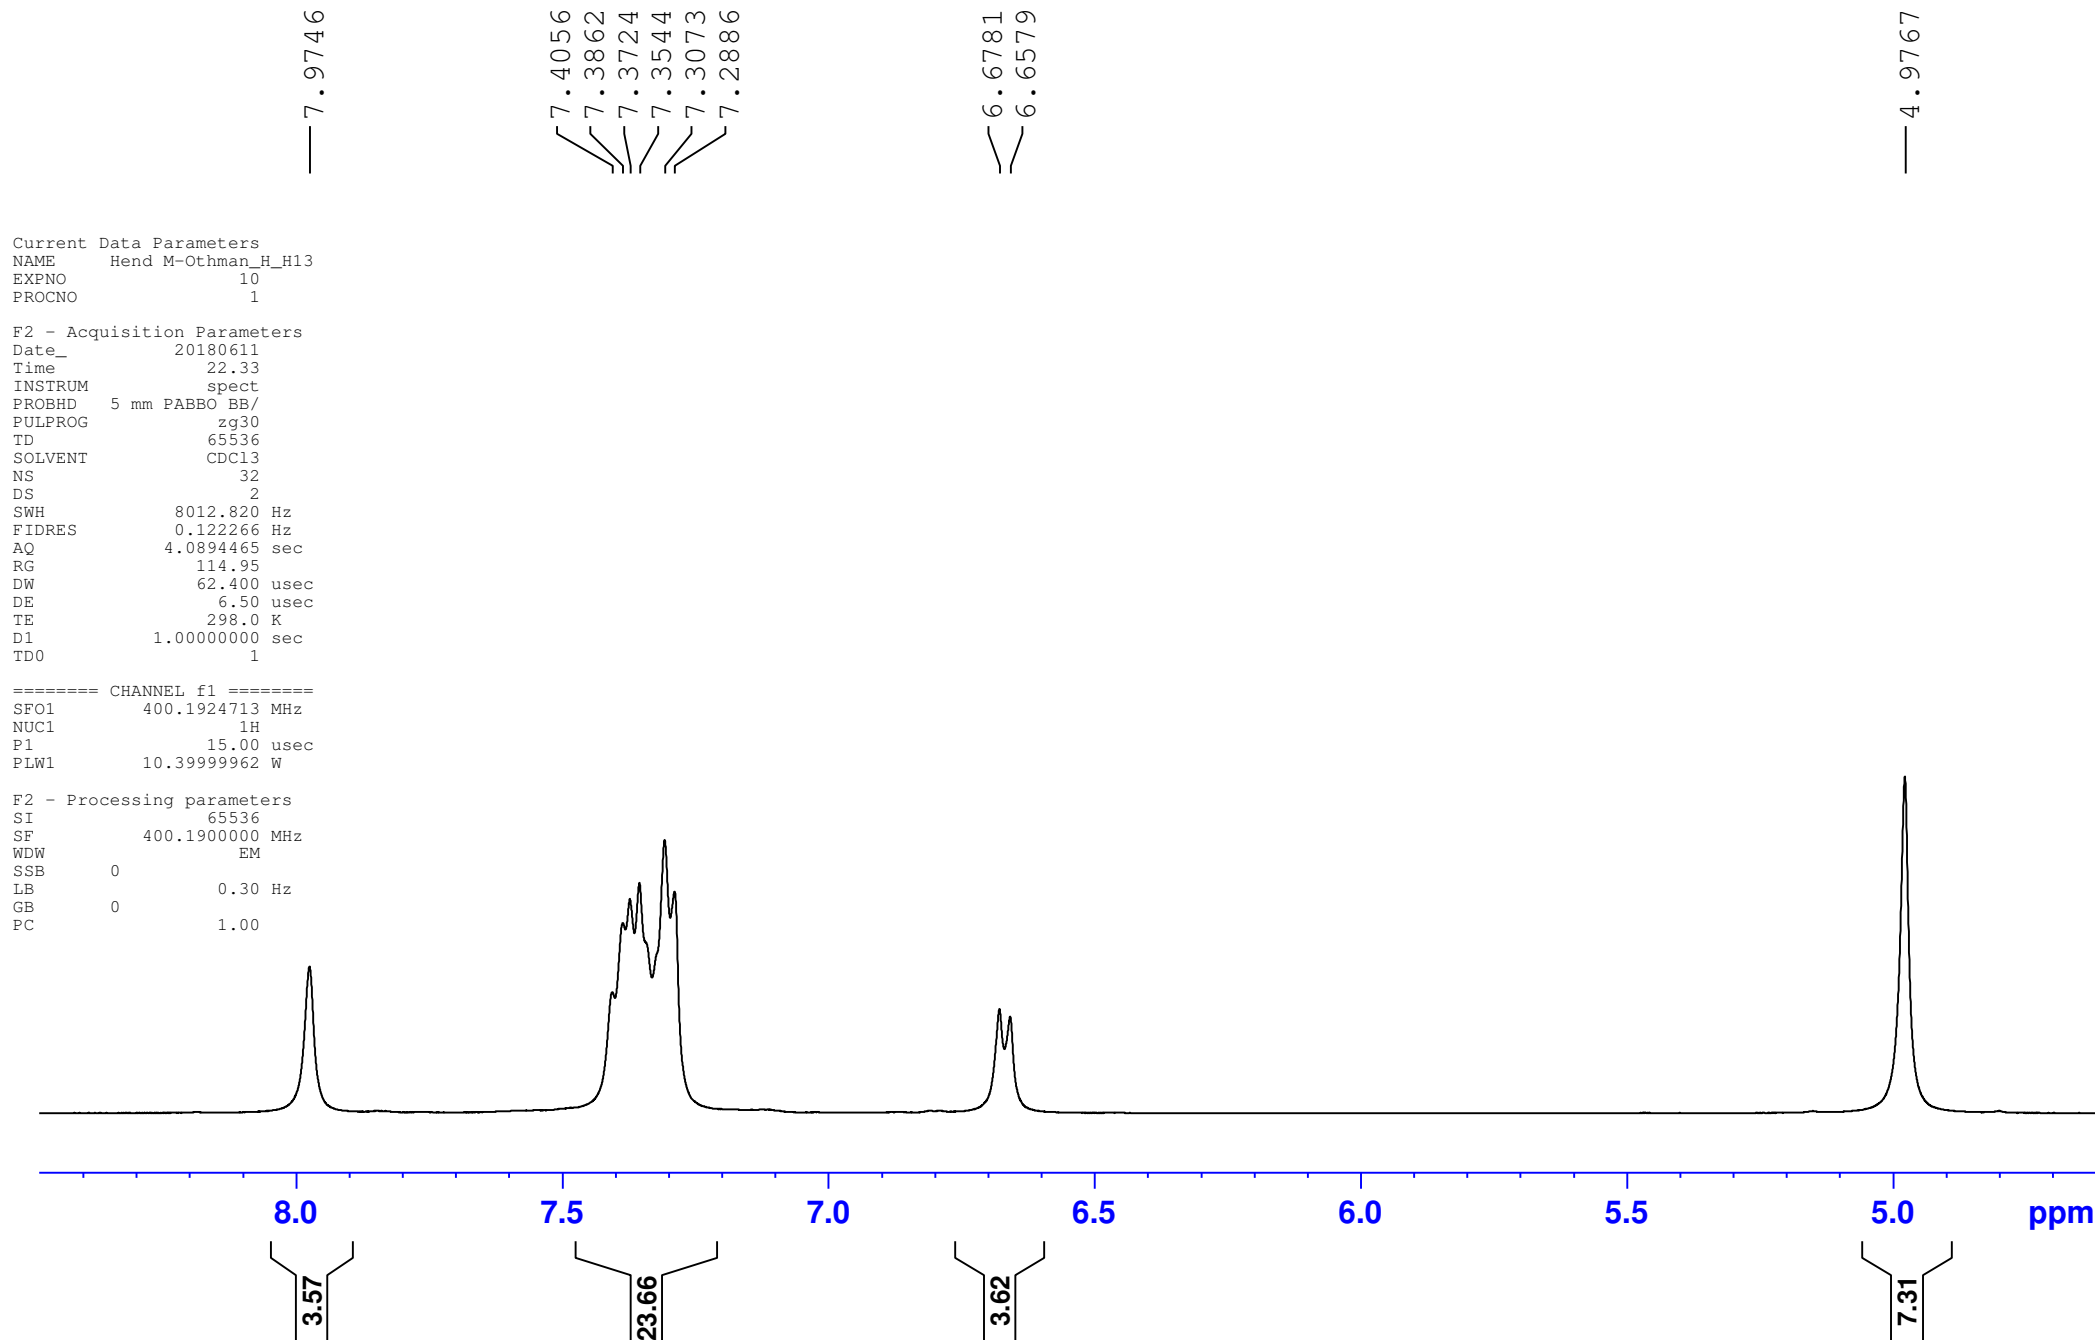

Current Data Parameters  
NAME Hend M-Othman\_H\_H13  
EXPNO 10  
PROCNO 1

F2 - Acquisition Parameters  
Date\_ 20180611  
Time 22.33  
INSTRUM spect  
PROBHD 5 mm PABBO BB/  
PULPROG zg30  
TD 65536  
SOLVENT CDCl3  
NS 32  
DS 2  
SWH 8012.820 Hz  
FIDRES 0.122266 Hz  
AQ 4.0894465 sec  
RG 114.95  
DW 62.400 usec  
DE 6.50 usec  
TE 298.0 K  
D1 1.00000000 sec  
TD0 1

===== CHANNEL f1 =====  
SFO1 400.1924713 MHz  
NUC1 1H  
P1 15.00 usec  
PLW1 10.39999962 W

F2 - Processing parameters  
SI 65536  
SF 400.1900000 MHz  
WDW EM  
SSB 0  
LB 0.30 Hz  
GB 0  
PC 1.00

— 2.1378  
— 2.0651  
— 1.8020

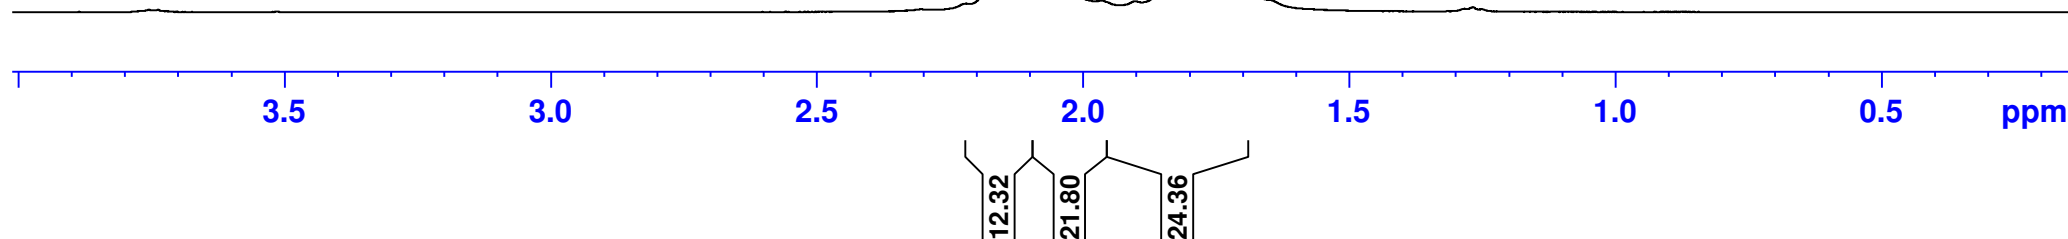

Supplement: f1 [file 6659156.f1.zip › 6659156.f1/Supplementary 2.pdf]
