# Supplementary material for: Schiff Bases of Isatin and Adamantane-1-Carbohydrazide: Synthesis, Characterization and Anticonvulsant Activity
Source: Hindawi journal article supplement (doi:10.1155/2021/6659156), 2021-01-25
Supplement: f1 [file 6659156.f1.zip]

Archive with 2 entries (2 files):
- 6659156.f1/Supplementary 1.pdf
- 6659156.f1/Supplementary 2.pdf
