# Supplementary material for: Schiff Bases of Isatin and Adamantane-1-Carbohydrazide: Synthesis, Characterization and Anticonvulsant Activity
Source: Hindawi journal article supplement (doi:10.1155/2021/6659156), 2021-01-25
Supplement: f1 [file 6659156.f1.zip › 6659156.f1/Supplementary 1.pdf]

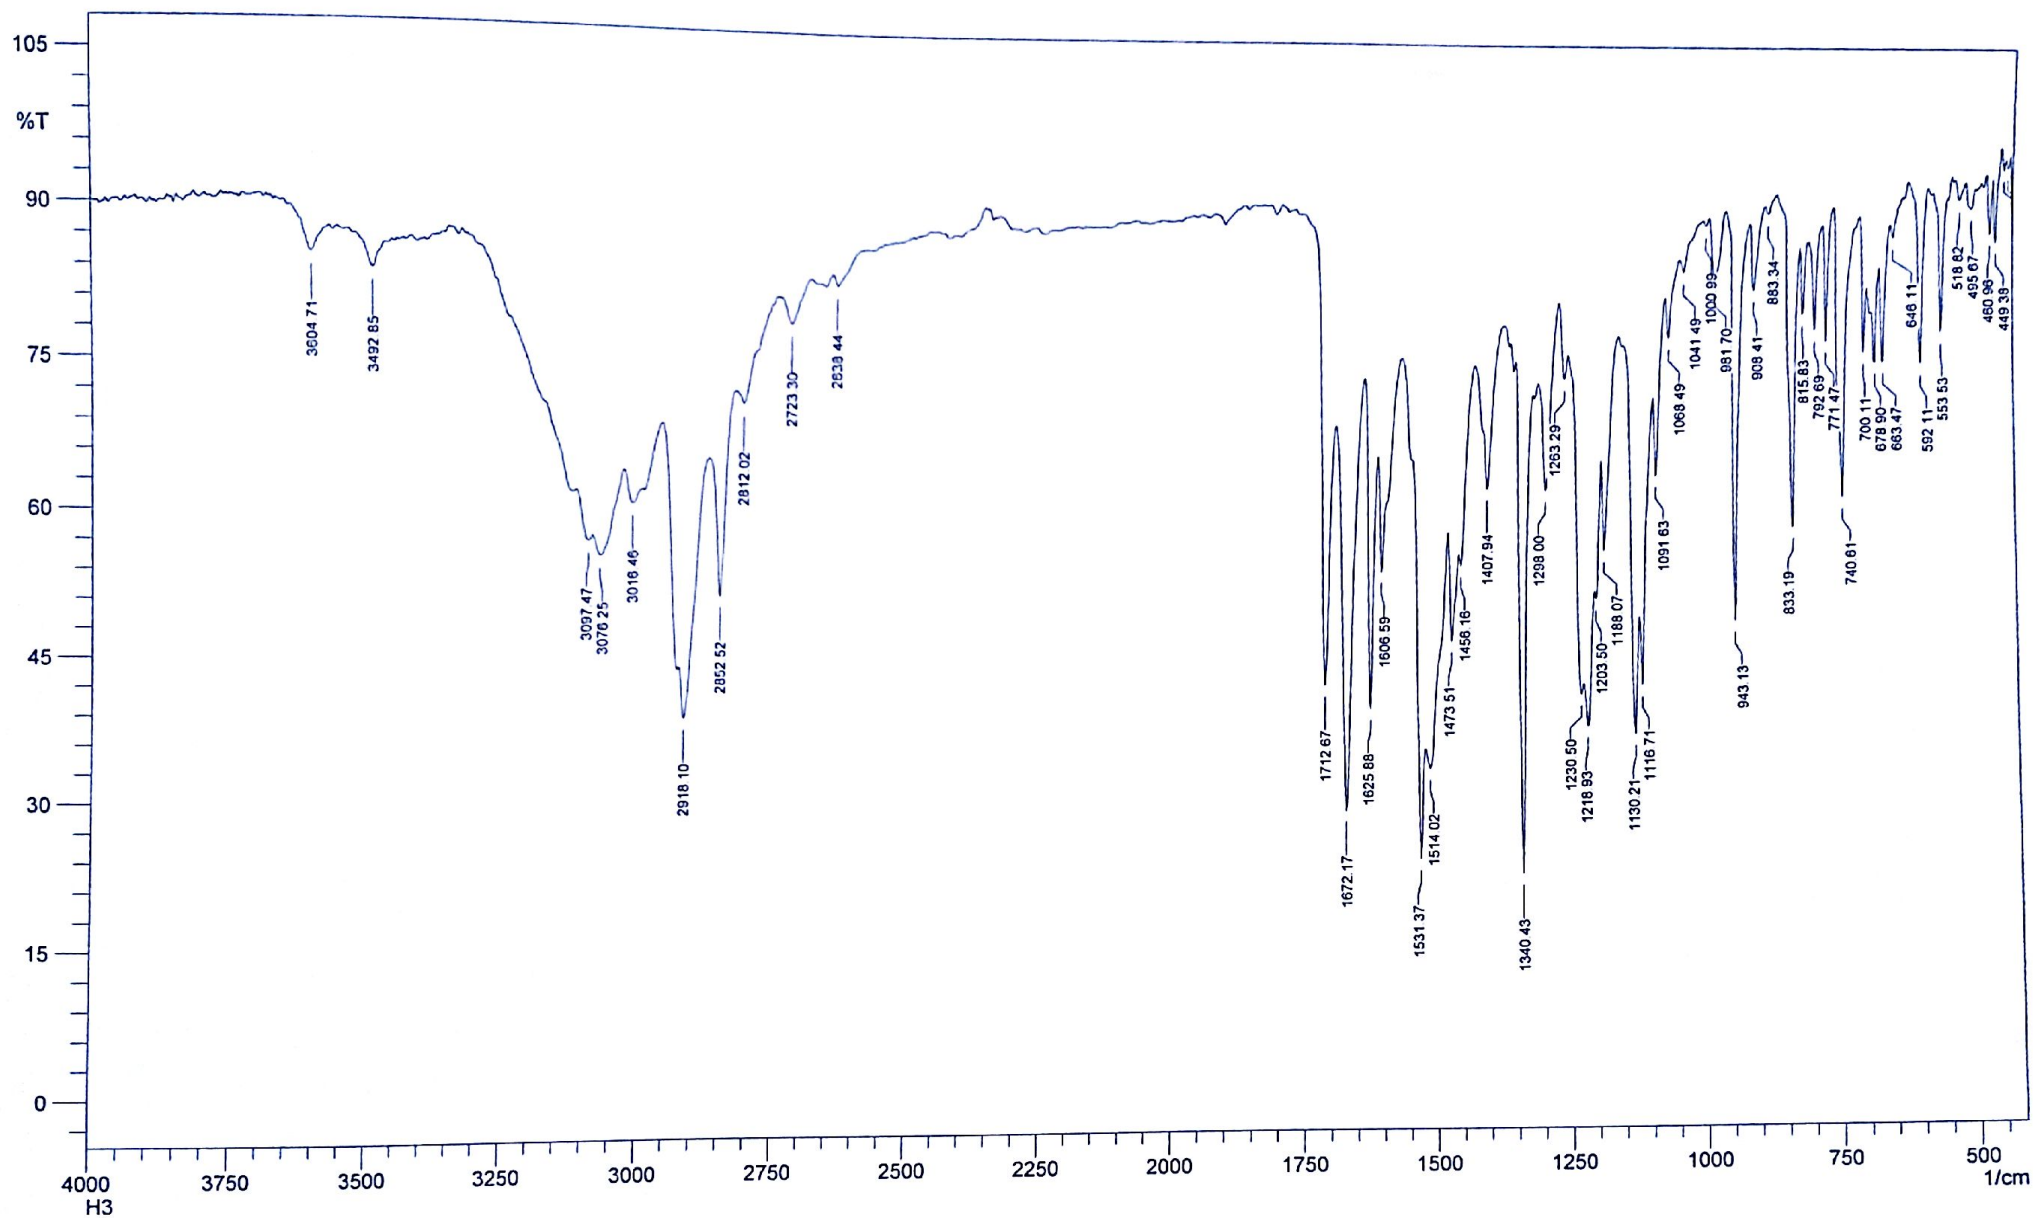

Comment;  
H3

Date/Time; 11/22/2017 1:31:14 PM  
User; Valantina

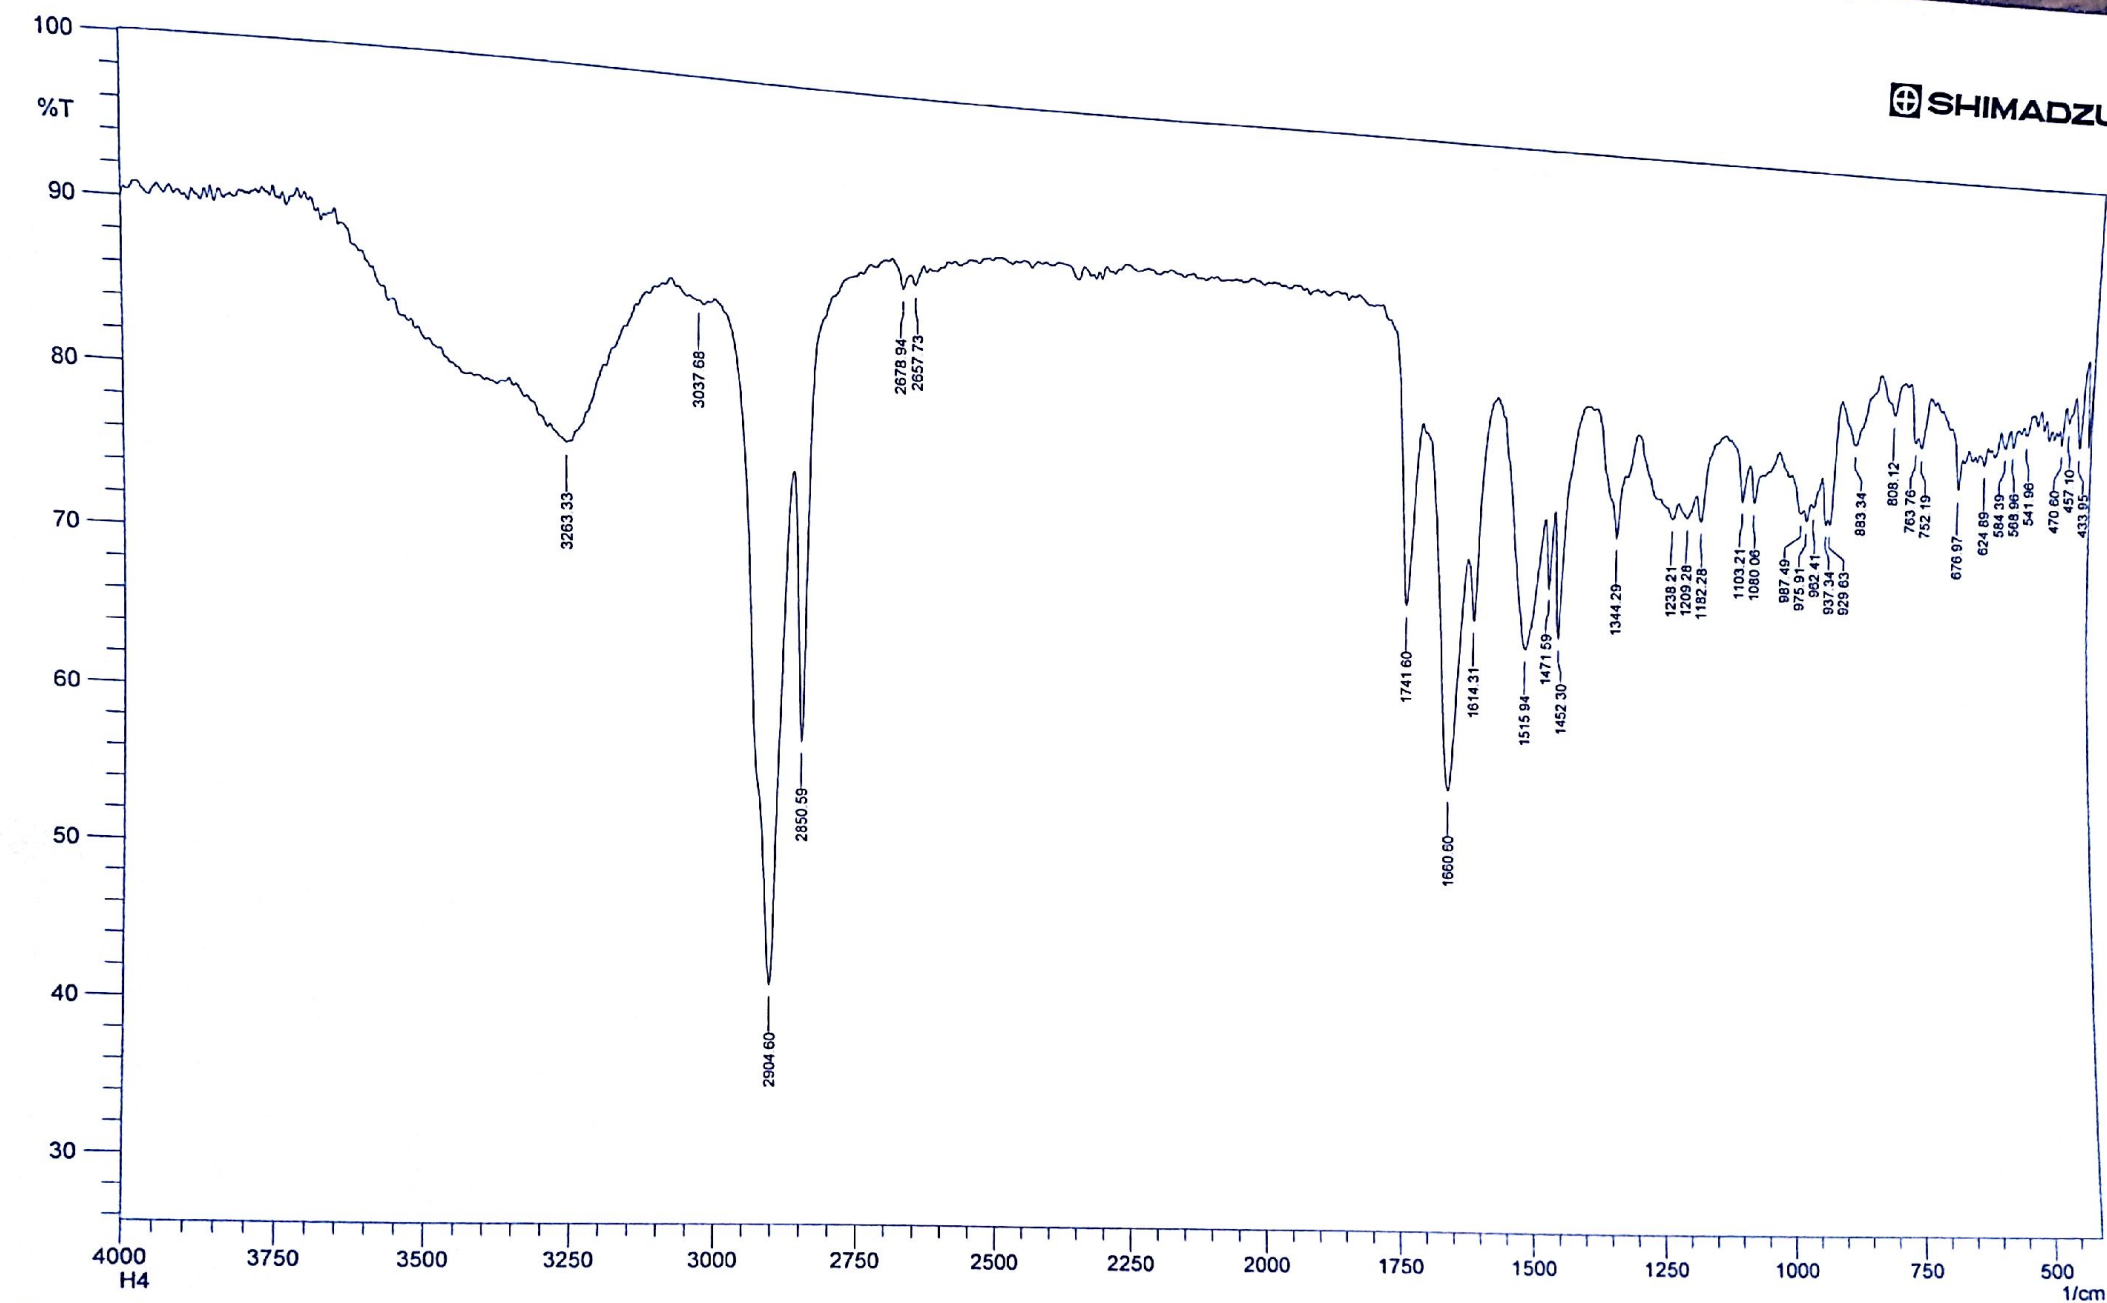

Comment;

H4

Date/Time; 11/22/2017 1:58:16 PM

User; Valentina

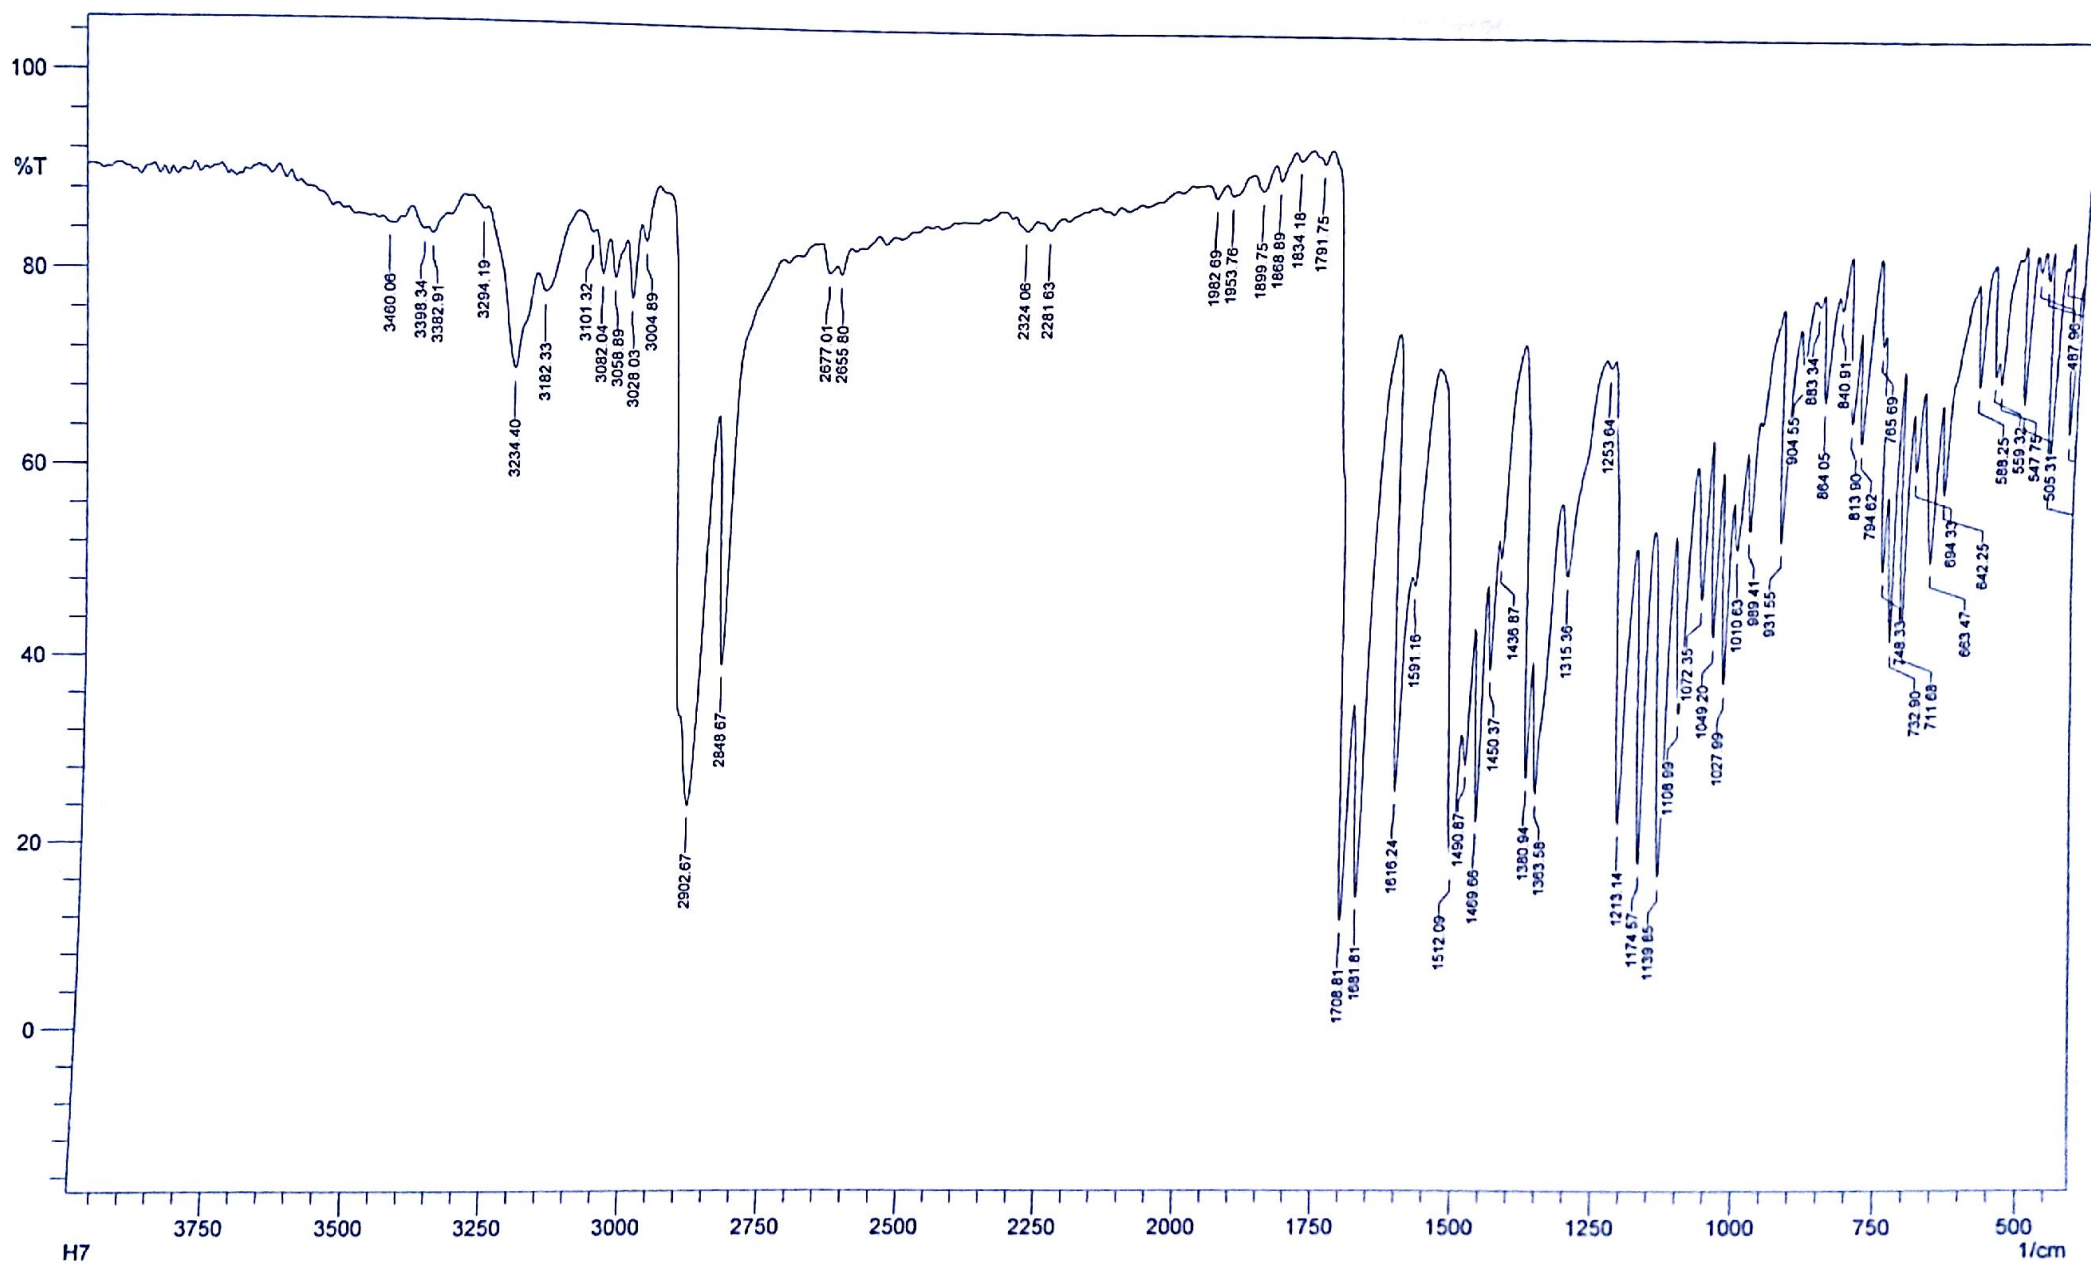

H7

Comment:

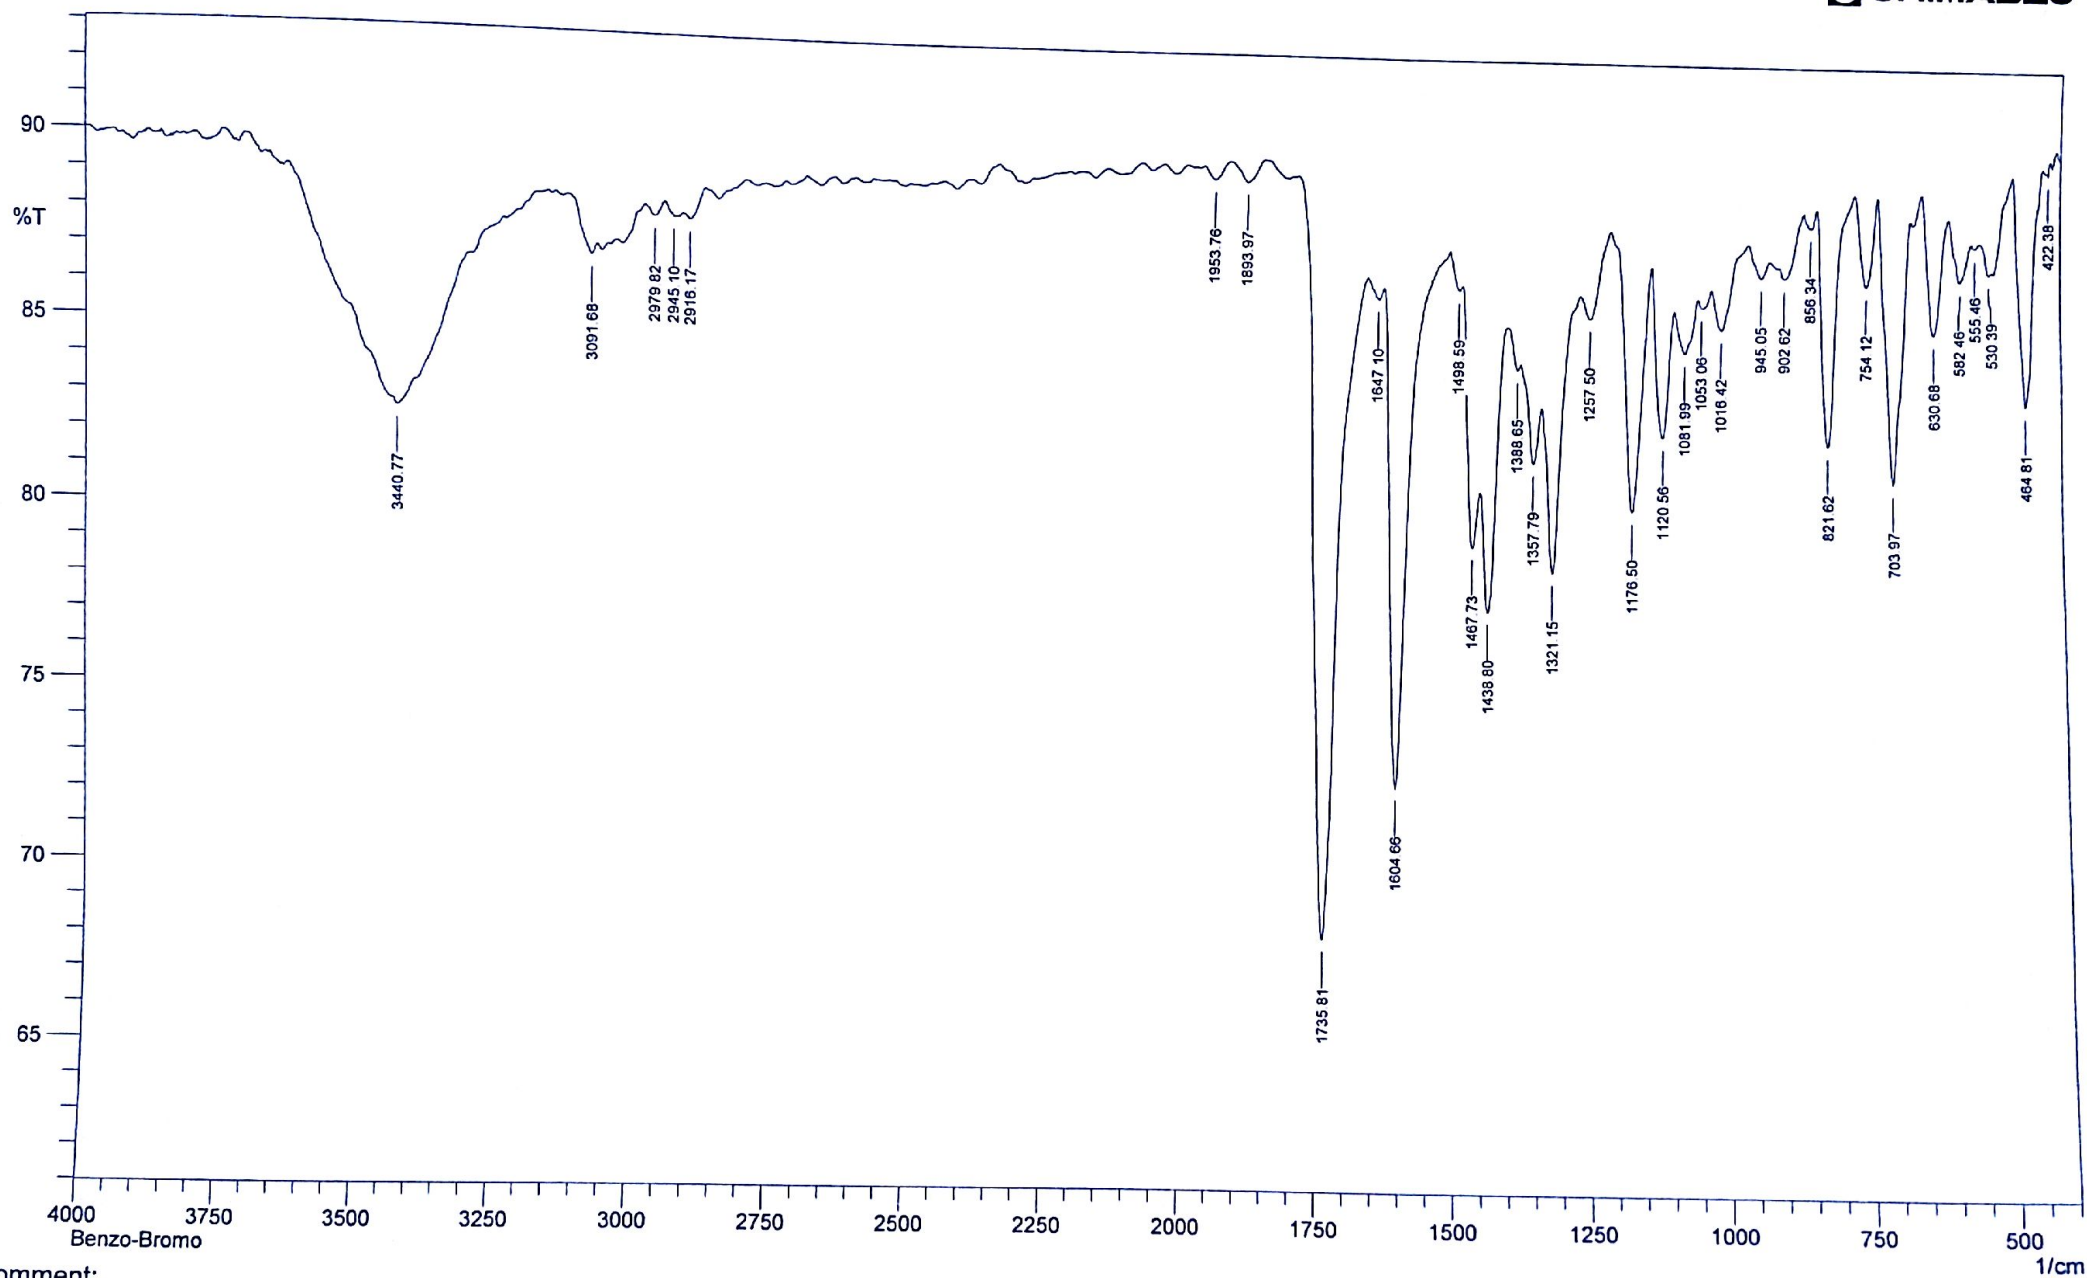

Comment;

Benzo-Bromo

Date/Time; 11/22/2017 10:20:06 AM

User: Valentina

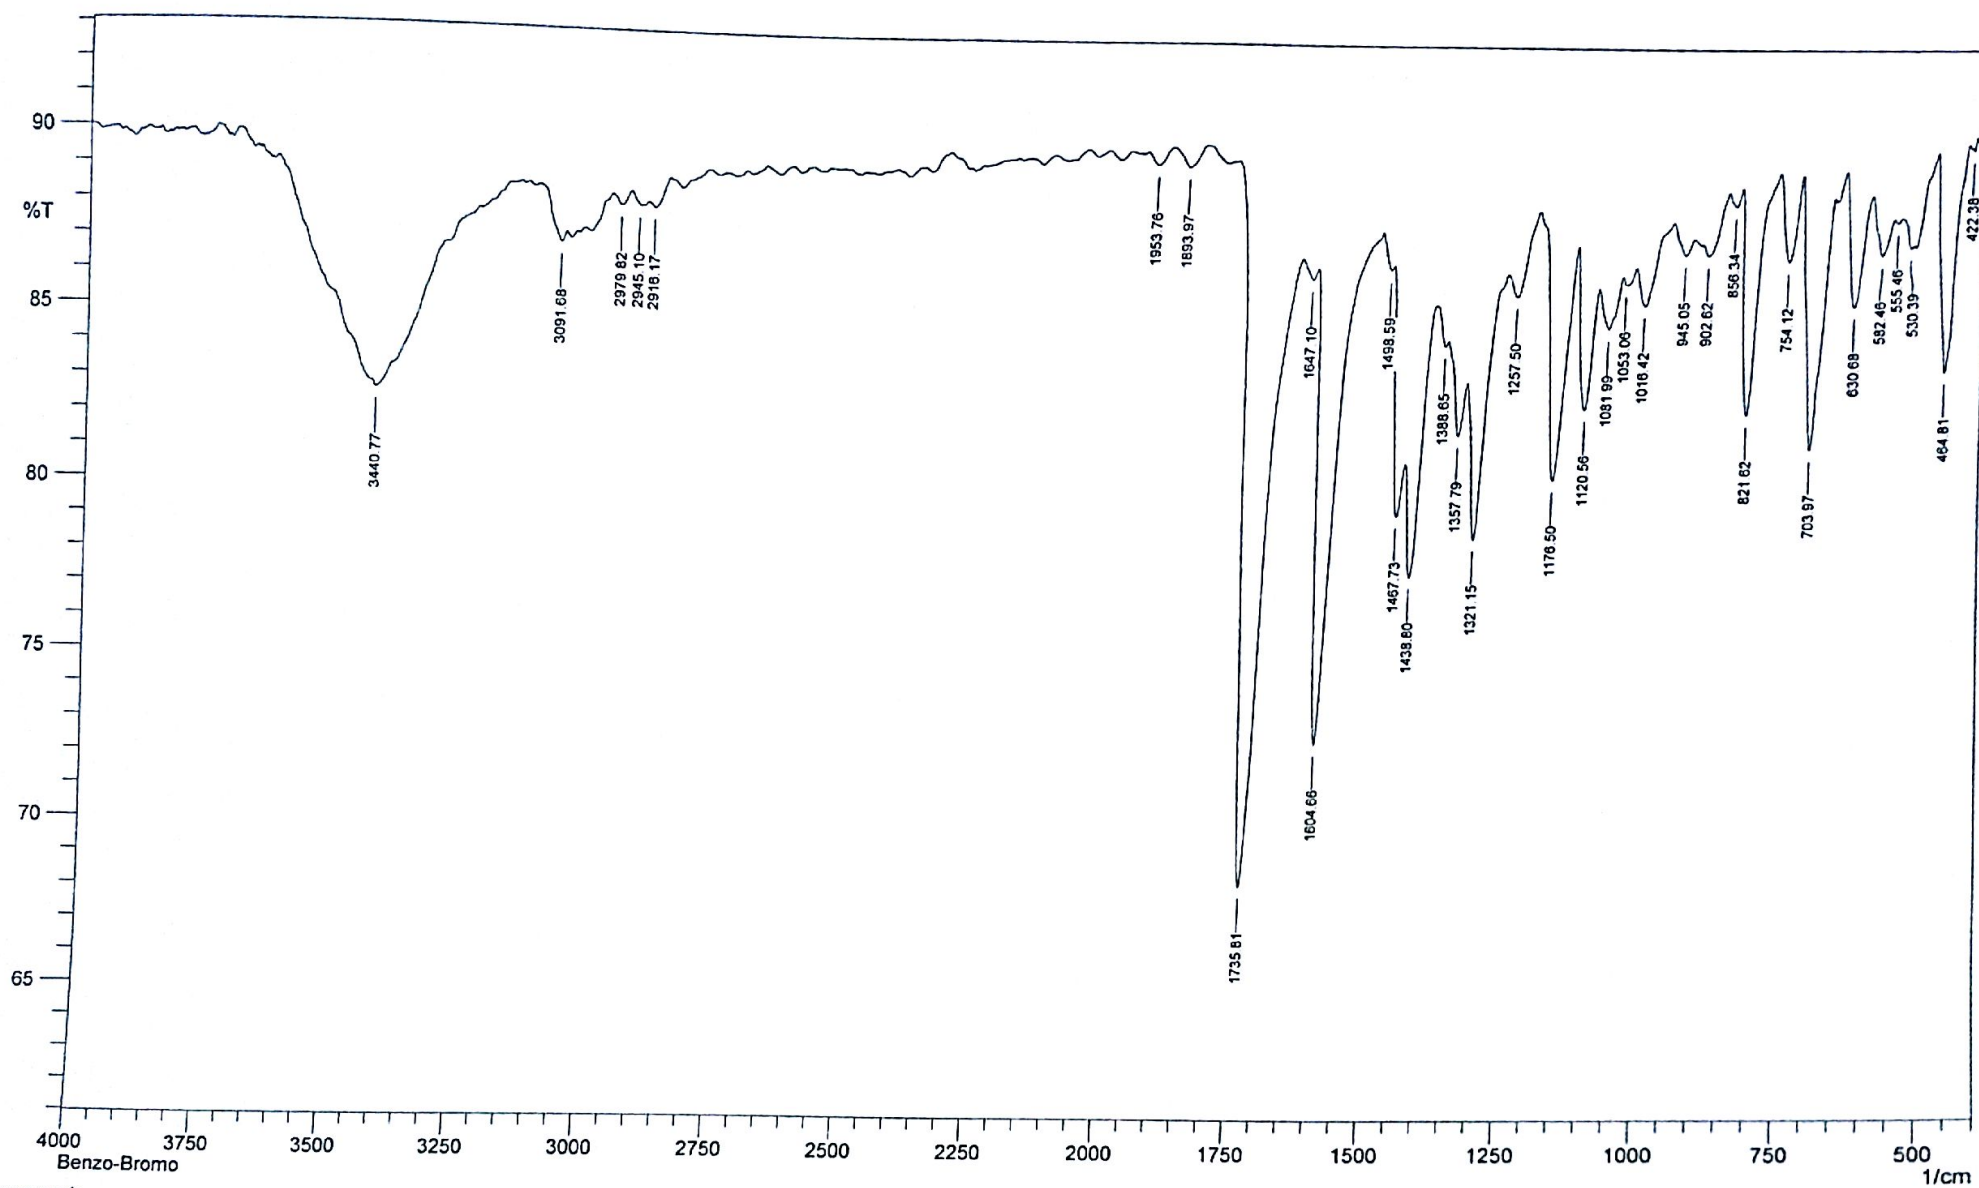

Comment;

Benzo-Bromo

Date/Time; 11/22/2017 10:20:06 AM

User; Valentina

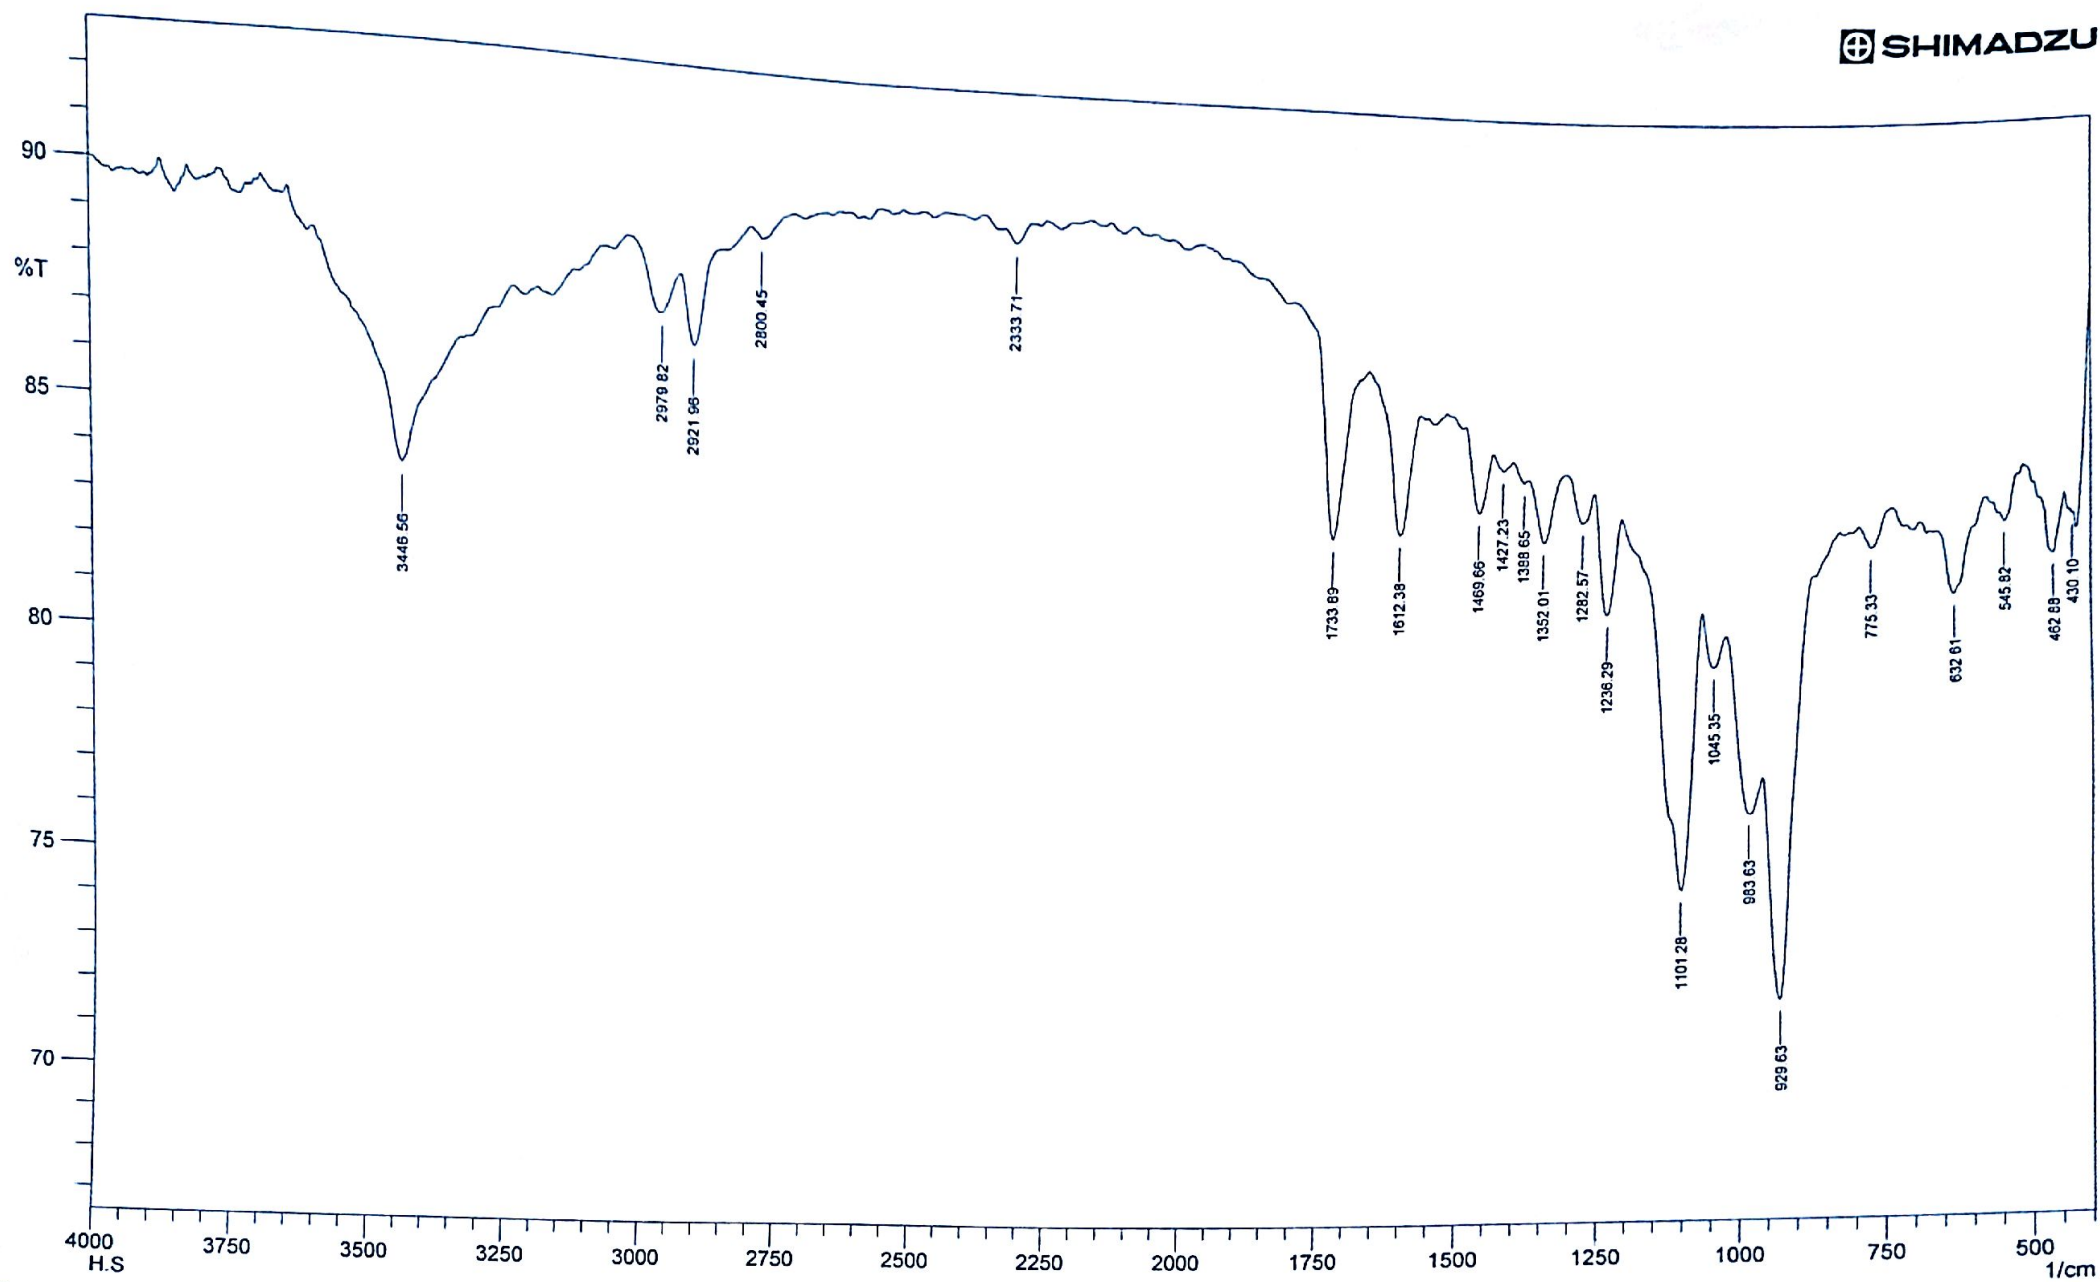

Comment;  
H.S

Date/Time; 11/22/2017 9:48:59 AM  
User; Valentina

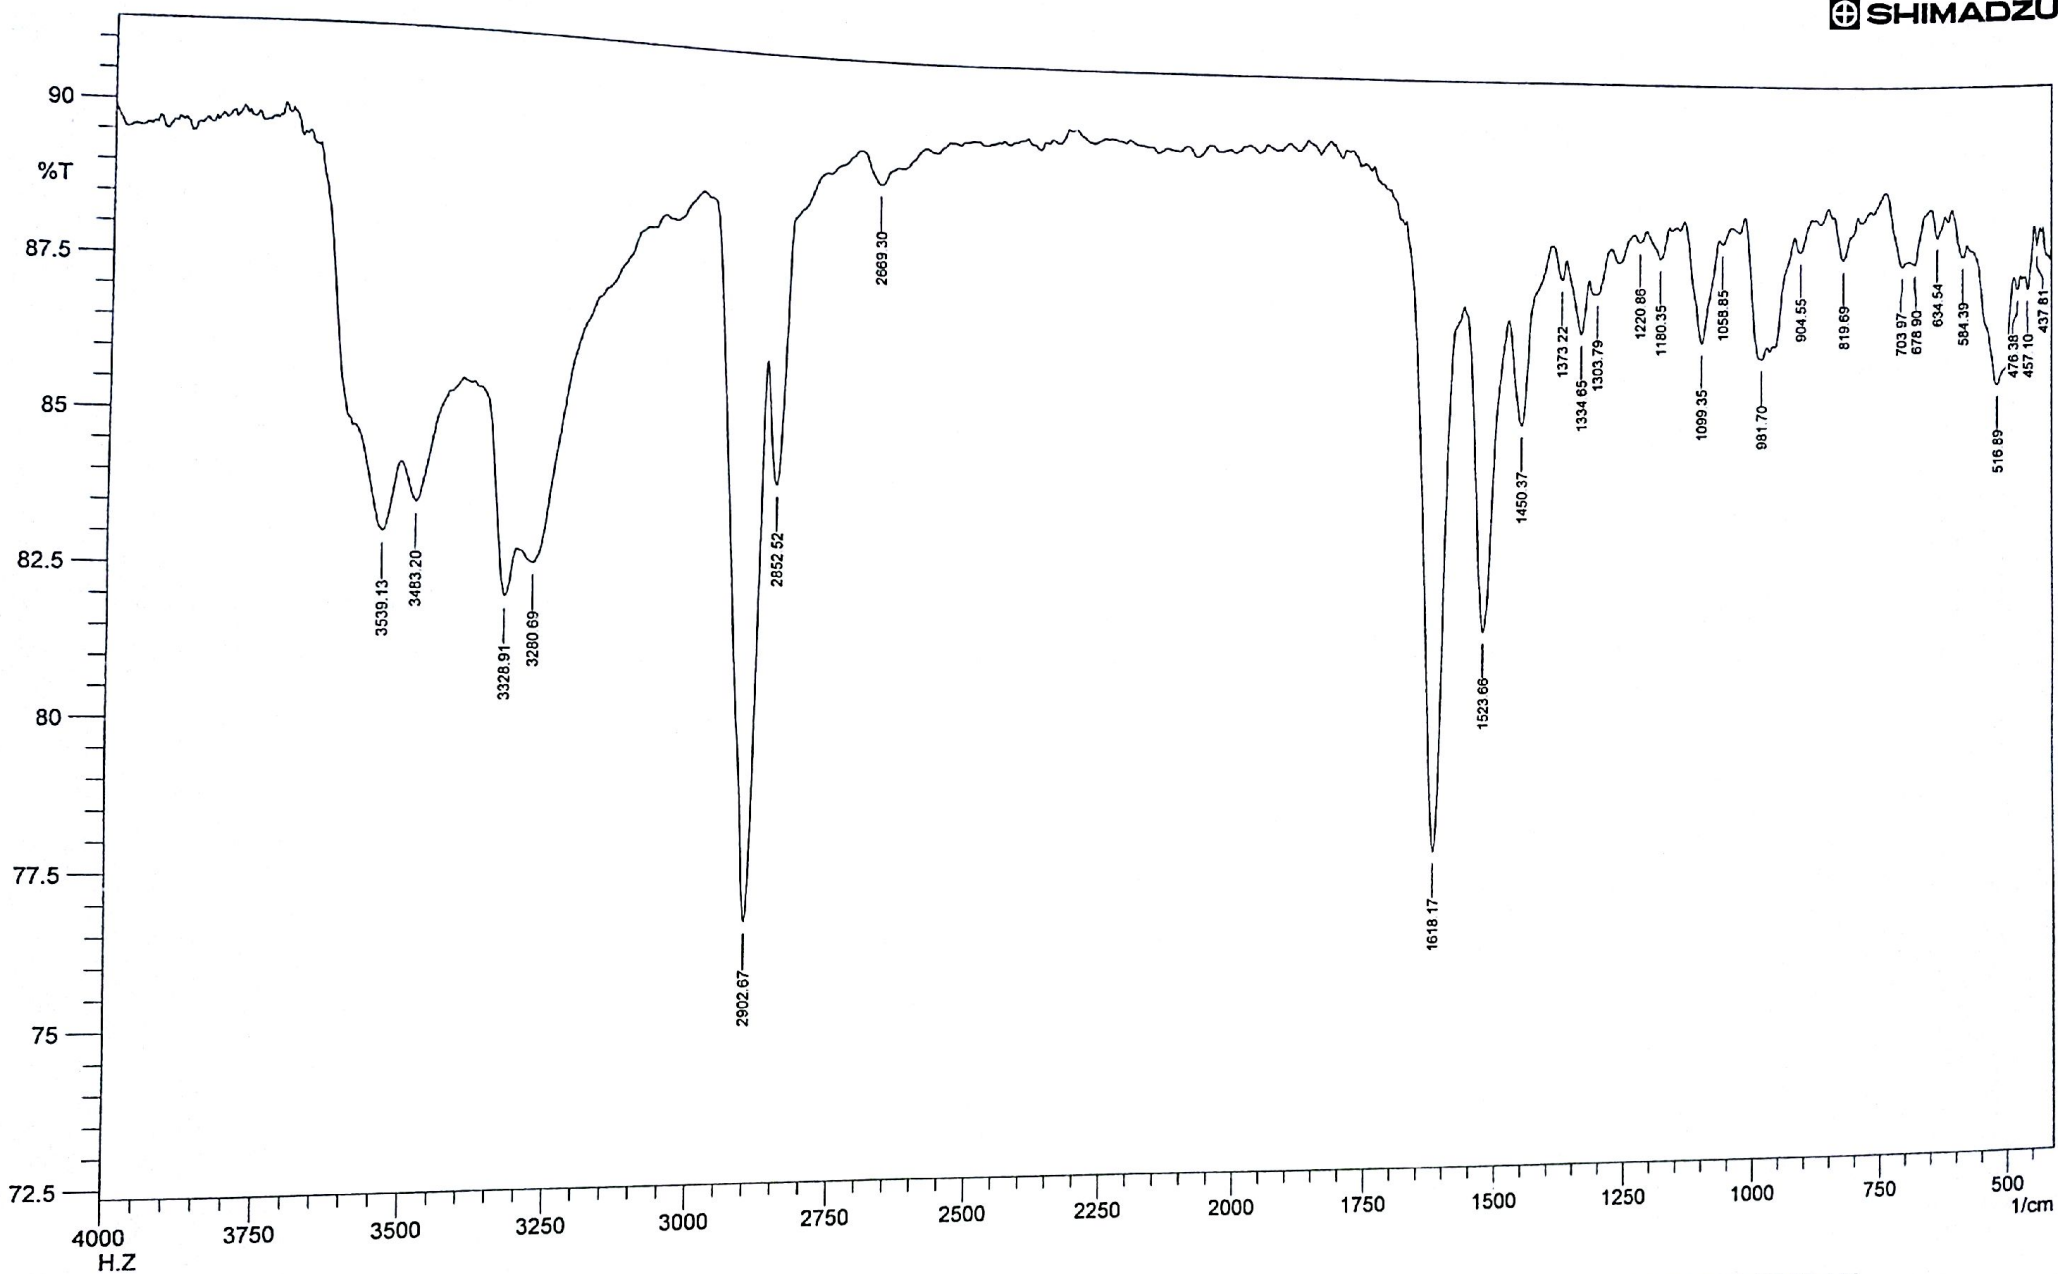

Comment;  
H.Z

Date/Time; 11/22/2017 9:56:21 AM  
User; Valantina

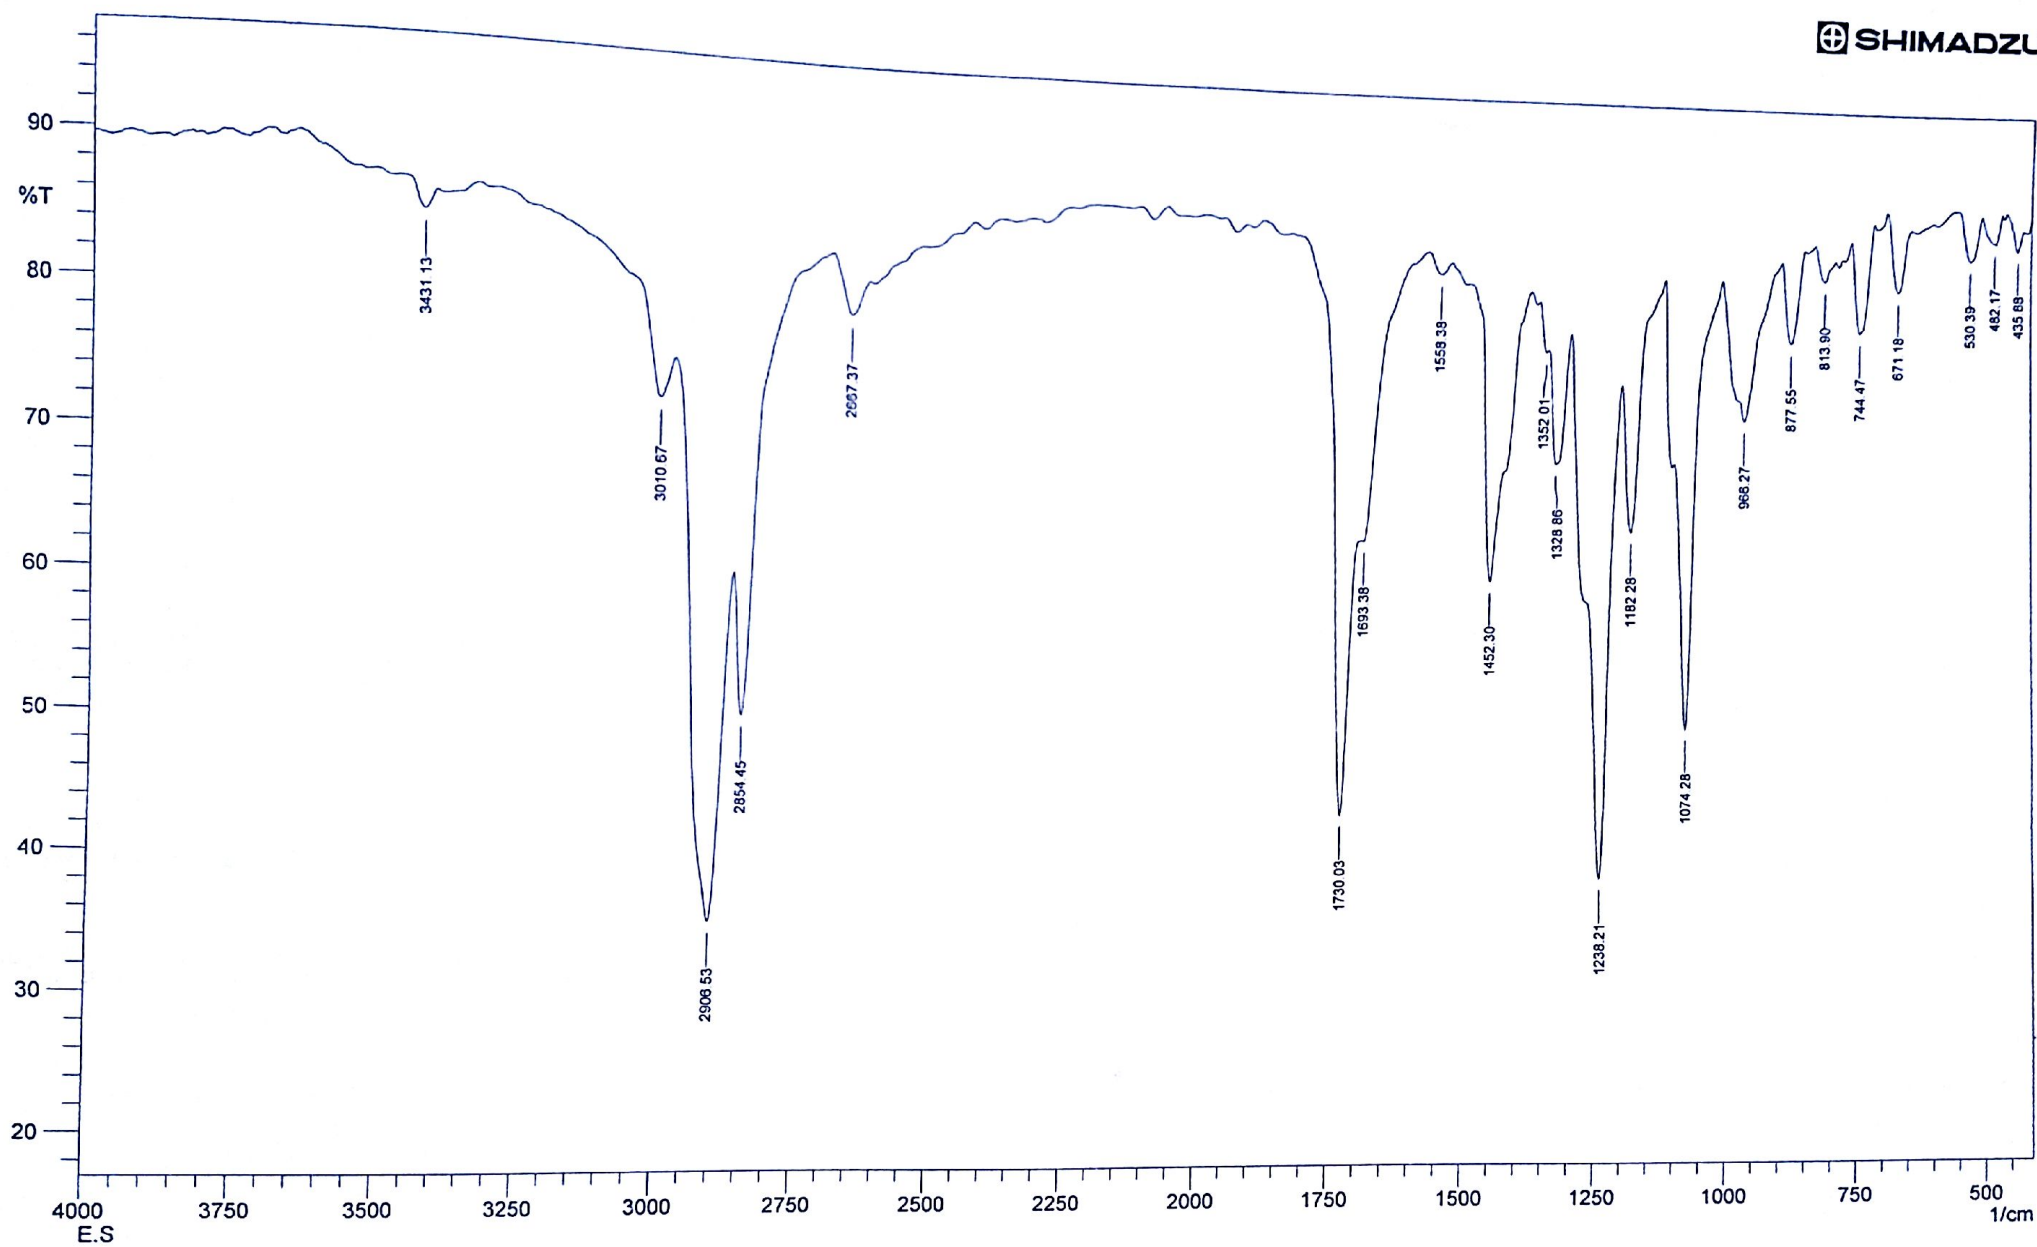

Comment;  
E.S

Date/Time; 11/22/2017 10:36:07 AM  
User; Valentina

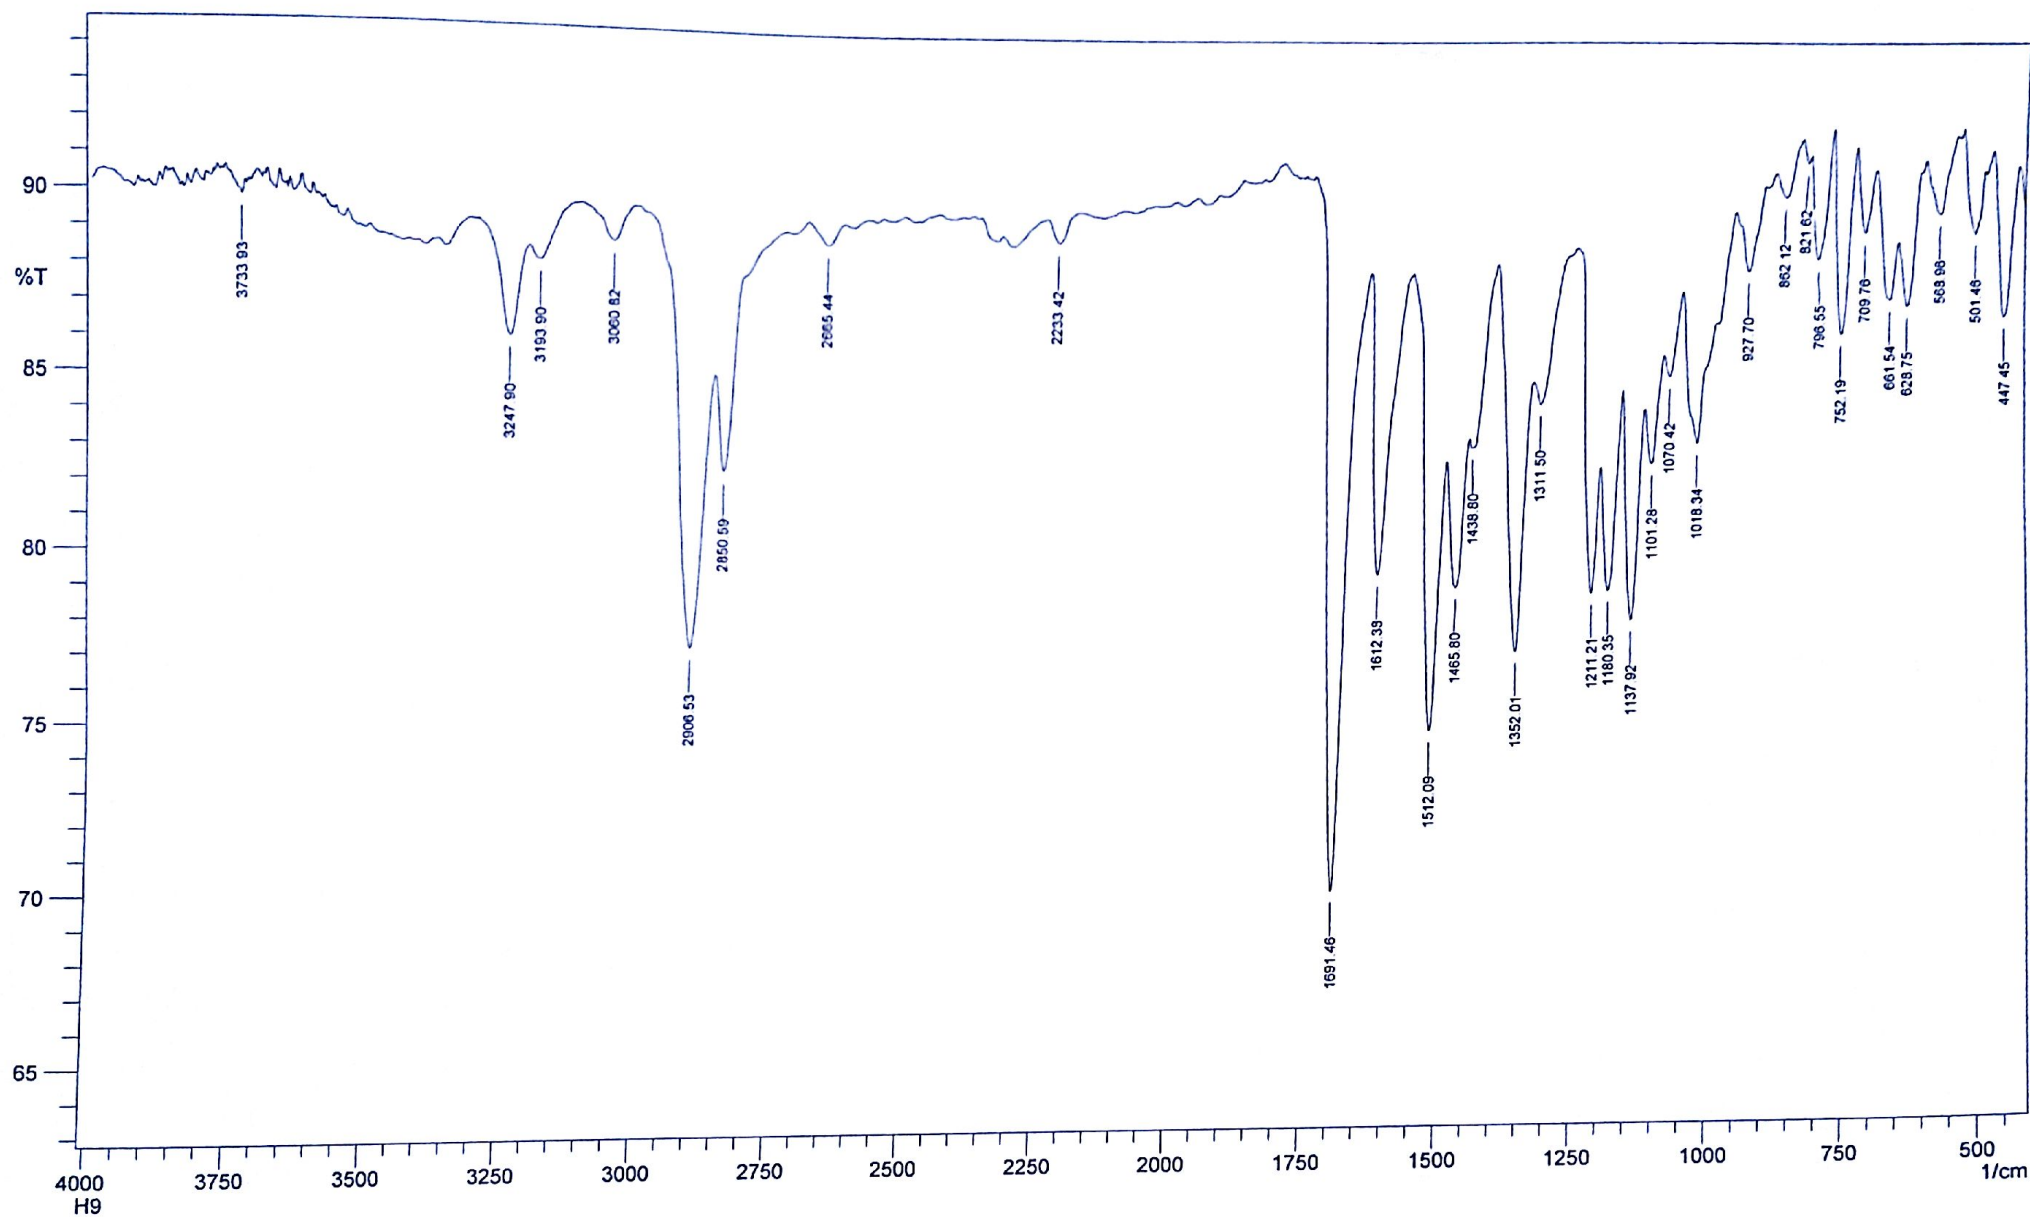

Comment;

H9

Date/Time; 11/23/2017 11:05:32 AM

User; Valantina
